# Supplementary material for: Direct and selective metal-free N6-arylation of adenosine residues for simple fluorescence labeling of DNA and RNA
Source: Royal Society of Chemistry journal article supplement (doi:10.1039/d1cc02069b), 2021-01-01
Supplement: d1cc02069b1.pdf [file d1cc02069b1.pdf]

## Supporting Information

# Direct and Selective Metal-Free N<sup>6</sup>-Arylation of Adenosine Residues for Simple Fluorescence Labeling of DNA and RNA

Guralamatta Siddappa Ravi Kumara<sup>a</sup>, Anup Pandith<sup>a</sup> and Young Jun Seo<sup>a\*</sup>

<sup>a</sup>Department of Chemistry, Jeonbuk National University, Jeonju 561-756, Republic of Korea

Tel.: +82-63-270-3417; Fax: +82-63-270-3408; E-mail: yseo@jbnu.ac.kr

### Contents

1. General Information and Gel electrophoresis
2. General procedure for synthesis of all DMTdA fluoroarylation products and their <sup>1</sup>H and <sup>13</sup>C NMR spectroscopic data
3. Discussion of procedure for fluoroarylation of deoxyadenosine nucleosides
4. **Table S1:** Optimization of fluoroarylation of the 2-deoxyadenosine
5. **Table S2:** Arylation of Deoxyadenosine-, Deoxycytosine-, and Deoxyguanosine-Containing Polythymine Oligonucleotides with Z in Phosphate Buffer
6. **Figure S1:** UV–Vis absorption and fluorescence spectra of the arylated DMTdA derivatives **2a–h**
7. **Table S3:** Fluoroarylation of Oligonucleotides with probes X, Y and Z.
8. **Figure S2:** UV–Vis absorption spectra of **6a–j**
9. **Figure S3:** Excitation-dependent fluorescence emission of oligonucleotide **6h**
10. **Figure S4:** PAGE analysis of arylated oligonucleotides **6a–c**
11. **Figure S5:** Time-dependent fluorescence spectra recorded for **6a** arylation
12. **Figure S6 and S7:** Primer extension of arylated oligonucleotide (**6d**) and its corresponding melting point data
13. HPLC data of arylated oligonucleotides (**Figures S8–S28**)
14. MALDI-TOF mass spectral data of arylated oligonucleotides (**Figures S29–S41**)
15. **Figure S42:** (a, b) Melting point and CD spectra of arylated Haripin 1 **6l** and G-quadruplex **6n**.
16. Calculation of quantum yields for arylated deoxyadenosine nucleosides in DMSO
17. <sup>1</sup>H and <sup>13</sup>C NMR spectra of all DMTdA fluoroarylation products

## 1. 1. General Information

All reagents were used from commercial sources without further purification.  $^1\text{H}$  and  $^{13}\text{C}$  NMR spectra were recorded using a Bruker AV-400 spectrometer with  $\text{CDCl}_3$  or  $\text{DMSO-}d_6$  as the solvent and tetramethylsilane as the internal standard. UV–Vis spectra were recorded at room temperature using a Cary Series UV–Vis spectrophotometer (Agilent Technologies) and a 1-cm path-length quartz cuvette; absorbance changes were measured immediately after UV irradiation of the sample solution in the cuvette. Fluorescence emission spectra were recorded at room temperature using a PF–65000 spectrofluorometer. The confocal Microscopy images were recorded with All-natural oligonucleotides were purchased from Bioneer (Seoul, Republic of Korea). Deoxyribonucleotide triphosphates mixture 2 mM each (dNTPs), nfu special enzyme and buffer were purchased from Enzynomics (Bioneer, Republic of Korea).

### Gel Electrophoresis

Native polyacrylamide gel electrophoresis (nPAGE, 18%) was adopted to characterize the DNA products. The reaction mixture (10 mL) was mixed with 2.5 mL of 6x loading buffer and loaded into the well. Gel electrophoresis was performed in 1x TBE buffer (89 mM Tris, 89 mM borate, 2 mM EDTA, pH 8.3) at a constant potential of 95/80 V for 90-180 min and a current of 3 mA, followed by scanning on a gel image system. Similarly, RCA products (15  $\mu\text{L}$ ) were mixed with the loading buffer (6x, 2.5  $\mu\text{L}$ ) and run with 2% agarose gel for 40/60 min (100/50 V) in 1x TBE buffer. The gel was stained with ethidium bromide (EB) and then photographed using a ChemiDoc MP imaging system (Bio-Rad).

## 2. General Procedure for Fluoroarylation of Deoxyadenosine Nucleoside

Dimethoxytrityl-protected deoxyadenosine (0.3 mmol) and  $\text{K}_3\text{PO}_4$  (0.6 mmol) were suspended in DMSO (1 mL) in a screw-capped glass vial and then a fluoroaryl compound (0.36 mmol) was added. The resultant mixture was stirred at 100  $^\circ\text{C}$  for 16 h. The reaction was monitored using TLC ( $\text{CH}_2\text{Cl}_2/\text{MeOH}$ , 95:5). Upon completion of the reaction, the mixture was diluted with EtOAc (20 mL) and washed with  $\text{H}_2\text{O}$  (2  $\times$  15 mL). The organic phase was separated, dried (anhydrous  $\text{Na}_2\text{SO}_4$ ), and evaporated to dryness. The residue was purified through column chromatography to yield the corresponding arylated product.

### $^1\text{H}$ and $^{13}\text{C}$ NMR Spectroscopic Data of All DMTdA Fluoroarylation Products

**2-((9-(5-((Bis(4-methoxyphenyl)(phenyl)methoxy)methyl)-4-hydroxytetrahydrofuran-2-yl)-9H-purin-6-yl)amino)benzaldehyde (2a):**

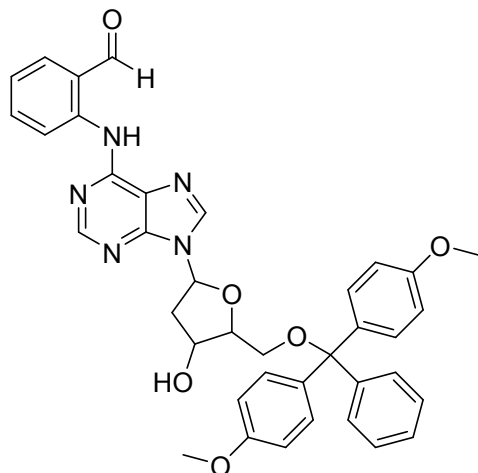

White solid, Weight – 109 mg (92%); **<sup>1</sup>H NMR (400 MHz, CDCl<sub>3</sub>):** δ 10.48 (s, 1H), 7.97 (s, 1H), 7.87 (q, 1H,  $J_1 = 6.11$  Hz,  $J_2 = 3.08$  Hz), 7.48–7.40 (m, 3H), 7.32–7.19 (m, 8H), 7.13 (d,  $J = 8.38$  Hz, 1H), 7.07 (d,  $J = 7.49$  Hz, 1H), 6.80 (dd,  $J_1 = 5.94$  Hz,  $J_2 = 2.97$  Hz, 4H), 6.47–6.43 (m, 1H), 6.02 (br s, 2H), 5.26–5.24 (m, 1H), 4.47–4.44 (m, 1H), 3.77 (s, 6H), 3.64–3.60 (m, 1H), 3.51–3.47 (m, 1H), 3.29–3.22 (m, 1H), 2.77–2.69 (m, 1H). **<sup>13</sup>C NMR (CDCl<sub>3</sub>, 100 MHz):** δ (ppm) 189.13, 159.17, 158.56, 155.56, 152.91, 149.49, 144.35, 139.31, 135.79, 135.44, 135.42, 129.96, 129.93, 128.84, 127.99, 127.87, 126.96, 125.24, 121.42, 120.28, 113.43, 113.16, 86.95, 85.05, 83.35, 78.48, 63.22, 55.16, 36.56. **MS (HRMS, FAB<sup>+</sup>):** Calculated for C<sub>38</sub>H<sub>35</sub>N<sub>5</sub>O<sub>6</sub> ([M + H]):  $m/z$  657.2666; found: 658.2669.

**4-((9-(5-((Bis(4-methoxyphenyl)(phenyl)methoxy)methyl)-4-hydroxytetrahydrofuran-2-yl)-9H-purin-6-yl)amino)benzaldehyde (2b):**

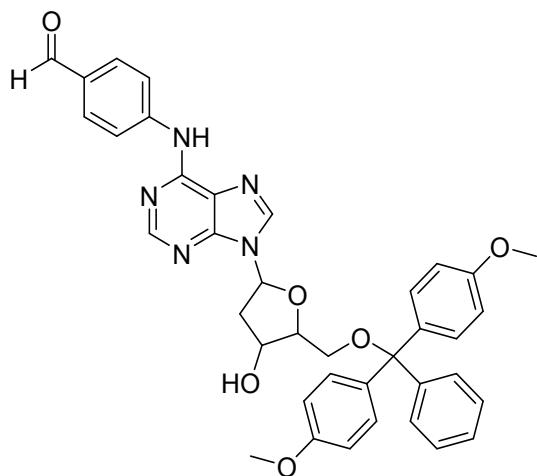

White solid, Weight – 102 mg (86%); **<sup>1</sup>H NMR (400 MHz, CDCl<sub>3</sub>):** δ 9.90 (s, 1H), 8.27 (s, 1H), 7.96 (s, 1H), 7.80 (d,  $J = 8$  Hz, 2H), 7.43–7.41 (m, 2H), 7.32–7.22 (m, 8H), 7.06 (d,  $J = 8$  Hz, 1H), 7.07 (d,  $J = 7.49$  Hz, 1H), 6.82–6.79 (m, 4H), 6.46 (dd,  $J_1 = 2.46$  Hz,  $J_2 = 5.85$  Hz, 1H), 5.62 (br s, 1H), 5.19–5.15 (m, 1H), 4.42–4.39 (m, 1H), 3.78 (s, 6H), 3.61–3.57 (m, 1H), 3.50–3.46 (m, 1H), 3.18–3.11 (m, 1H), 2.72–

2.67 (m, 1H). <sup>13</sup>C NMR (CDCl<sub>3</sub>, 100 MHz): δ (ppm) 190.68, 161.91, 158.65, 155.39, 153.03, 149.65, 144.38, 139.23, 135.45, 132.05, 130.43, 130.02, 130.01, 128.06, 127.96, 127.07, 120.31, 119.35, 115.59, 113.24, 87.06, 84.94, 83.44, 78.28, 63.37, 55.23, 36.78. MS (HRMS, FAB<sup>+</sup>): Calculated for C<sub>38</sub>H<sub>35</sub>N<sub>5</sub>O<sub>6</sub> ([M + H]): *m/z* 657.2666; found: 658.2663.

**1-(2-((9-(5-((Bis(4-methoxyphenyl)(phenyl)methoxy)methyl)-4-hydroxytetrahydrofuran-2-yl)-9H-purin-6-yl)amino)phenyl)ethan-1-one (2c):**

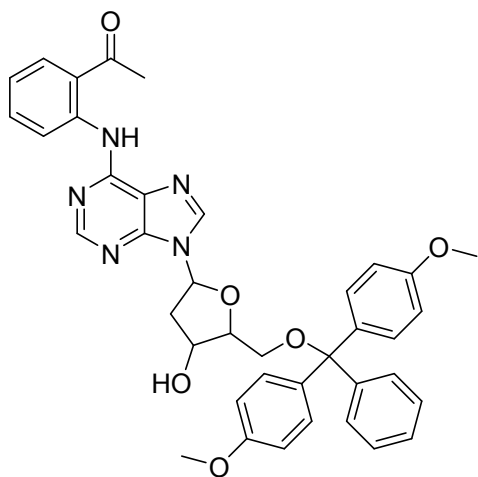

Light yellow solid, Weight – 78 mg (65%); <sup>1</sup>H NMR (400 MHz, DMSO-*d*<sub>6</sub>): δ 8.34 (s, 1H), 8.09 (s, 1H), 7.63 (dd, *J*<sub>1</sub> = 5.91 Hz, *J*<sub>2</sub> = 1.78 Hz, 1H), 7.51–7.47 (m, 1H), 7.36–7.31 (m, 5H), 7.22–7.17 (m, 6H), 7.07 (t, *J* = 7.74 Hz, 1H), 6.79 (t, *J* = 9.29 Hz, 4H), 6.44 (t, *J* = 6.72 Hz, 1H), 5.51–5.47 (m, 1H), 4.32 (q, *J* = 4.53 Hz, 1H), 3.72 (s, 3H), 3.71 (s, 3H), 3.48–3.41 (m, 2H), 3.31–3.26 (m, 1H), 2.69–2.63 (m, 2H), 2.54 (s, 3H). <sup>13</sup>C NMR (DMSO-*d*<sub>6</sub>, 100 MHz): δ (ppm) 199.66, 159.00, 158.98, 157.09, 157.03, 153.44, 149.90, 145.66, 141.25, 136.32, 136.3, 134.69, 130.82, 130.61, 130.55, 129.39, 128.72, 128.54, 127.61, 121.93, 120.41, 114.91, 114.06, 114.04, 86.81, 84.91, 78.73, 64.05, 55.94, 46.60, 35.74, 32.85. MS (HRMS, FAB<sup>+</sup>): Calculated for C<sub>39</sub>H<sub>37</sub>N<sub>5</sub>O<sub>6</sub> ([M + H]): *m/z* 671.2822; found: 672.2824.

**1-(4-((9-(5-((Bis(4-methoxyphenyl)(phenyl)methoxy)methyl)-4-hydroxytetrahydrofuran-2-yl)-9H-purin-6-yl)amino)phenyl)ethan-1-one (2d):**



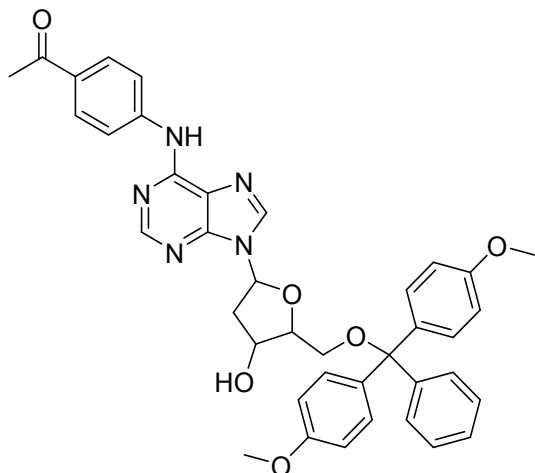

White solid, Weight – 65 mg (54%); **<sup>1</sup>H NMR (400 MHz, CDCl<sub>3</sub>)**: δ 8.28 (s, 1H), 7.98 (s, 1H), 7.89 (d, *J* = 8.89 Hz, 2H), 7.41 (d, *J* = 7.02 Hz, 2H), 7.32–7.22 (m, 8H), 6.98 (d, *J* = 8.9 Hz, 1H), 6.82 (d, *J* = 1.77 Hz, 2H), 6.80 (d, *J* = 1.77 Hz, 2H), 6.44 (q, *J* = 4.67 Hz, 1H), 5.67 (br s, 2H), 5.17–5.15 (m, 1H) 4.41–4.39 (m, 1H), 3.78 (s, 6H), 3.59–3.55 (m, 1H), 3.49–3.45 (m, 1H), 3.15–3.08 (m, 1H) 2.71–2.67 (m, 1H), 2.56 (s, 3H). **<sup>13</sup>C NMR (CDCl<sub>3</sub>, 100 MHz)**: δ (ppm) 196.64, 160.79, 158.64, 155.41, 153.01, 149.66, 144.39, 139.19, 135.48, 135.46, 130.87, 130.68, 130.03, 128.07, 127.95, 127.04, 115.0, 113.23, 87.03, 84.91, 83.51, 78.10, 63.42, 55.22, 36.89, 26.34. **MS (HRMS, FAB<sup>+</sup>)**: Calculated for C<sub>39</sub>H<sub>37</sub>N<sub>5</sub>O<sub>6</sub> ([M + H]): *m/z* 671.2822; found: 672.2825.

**2-((9-(5-((Bis(4-methoxyphenyl)(phenyl)methoxy)methyl)-4-hydroxytetrahydrofuran-2-yl)-9H-purin-6-yl)amino)benzonitrile (2e):**

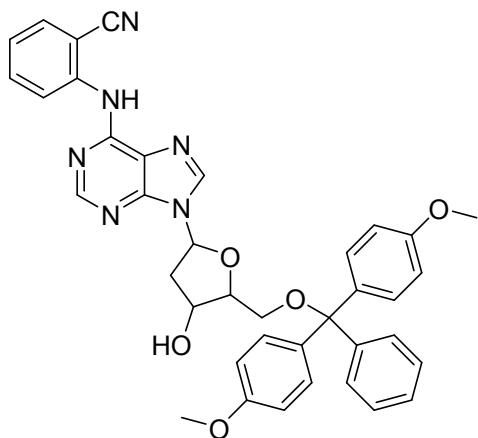

White solid, Weight – 110 mg (93%); **<sup>1</sup>H NMR (400 MHz, CDCl<sub>3</sub>)**: δ 8.14 (s, 1H), 7.87 (s, 1H), 7.56–7.52 (m, 1H), 7.38–7.32 (m, 2H), 7.24–7.12 (m, 9H), 6.98 (t, *J* = 7.56 Hz, 1H), 6.75–6.71 (m, 4H), 6.37 (q, *J* = 4.66 Hz, 1H), 5.66 (br s, 2H), 5.15–5.13 (m, 1H), 4.38–4.35 (m, 1H), 3.71 (s, 6H), 3.61–3.57 (m, 1H), 3.43–3.38 (m, 1H), 3.34–3.27 (m, 1H), 2.66–2.60 (m, 2H). **<sup>13</sup>C NMR (CDCl<sub>3</sub>, 100 MHz)**: δ (ppm) 158.71,

158.58, 155.42, 152.81, 149.57, 144.42, 139.97, 135.50, 134.28, 134.11, 133.54, 130.01, 129.99, 128.05, 127.90, 126.99, 121.48, 120.56, 116.57, 116.38, 113.39, 113.18, 102.69, 87.01, 85.49, 83.07, 79.12, 63.16, 55.21, 35.73. **MS (HRMS, FAB<sup>+</sup>):** Calculated for C<sub>38</sub>H<sub>34</sub>N<sub>6</sub>O<sub>5</sub> ([M + H]): *m/z* 654.2669; found: 655.2671.

**4-((9-(5-((Bis(4-methoxyphenyl)(phenyl)methoxy)methyl)-4-hydroxytetrahydrofuran-2-yl)-9H-purin-6-yl)amino)benzonitrile (2f):**

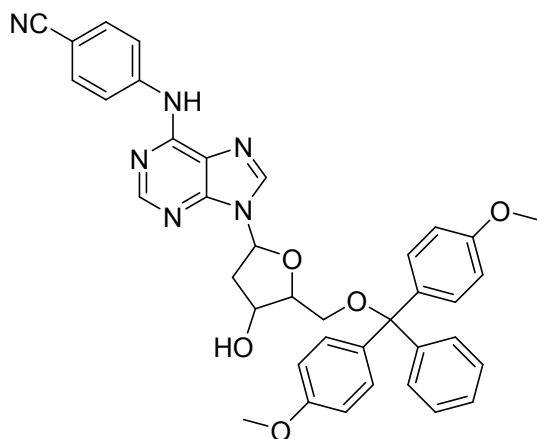

White solid, Weight – 113 mg (96%); **<sup>1</sup>H NMR (400 MHz, CDCl<sub>3</sub>):** δ 8.19 (s, 1H), 7.87 (s, 1H), 7.48–7.46 (m, 2H), 7.34–7.32 (m, 2H), 7.24–7.18 (m, 8H), 6.97–6.95 (m, 2H), 6.75–6.72 (m, 4H), 6.80 (q, *J* = 4.69 Hz, 1H), 5.57 (br s, 2H), 5.06–5.05 (m, 1H), 4.30–4.28 (m, 1H), 3.71 (s, 6H), 3.54–3.50 (m, 1H), 3.42–3.38 (m, 1H), 3.10–3.04 (m, 1H), 2.62–2.5 (m, 1H). **<sup>13</sup>C NMR (CDCl<sub>3</sub>, 100 MHz):** δ (ppm) 160.27, 158.70, 155.45, 153.05, 149.66, 144.38, 139.27, 135.41, 134.17, 130.04, 130.03, 128.07, 128.01, 127.14, 120.37, 118.99, 116.05, 113.28, 104.77, 87.17, 84.98, 83.29, 78.38, 63.33, 55.28, 36.57. **MS (HRMS, FAB<sup>+</sup>):** Calculated for C<sub>38</sub>H<sub>34</sub>N<sub>6</sub>O<sub>5</sub> ([M + H]): *m/z* 654.2669; found: 655.2653.

**2-((Bis(4-methoxyphenyl)(phenyl)methoxy)methyl)-5-(6-((2-nitrophenyl)amino)-9H-purin-9-yl)tetrahydrofuran-3-ol (2g):**

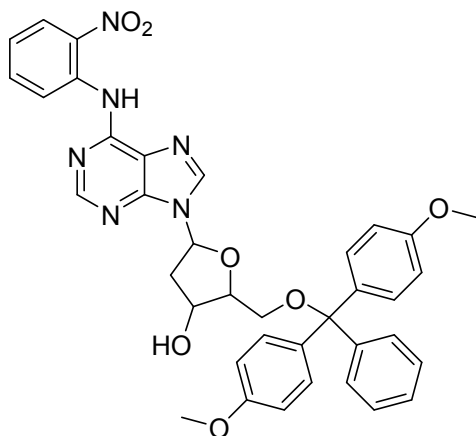

Yellow solid, Weight – 114 mg (94%); **<sup>1</sup>H NMR (400 MHz, CDCl<sub>3</sub>)**: δ 8.14 (s, 1H), 7.86 (s, 1H), 7.80–7.78 (m, 1H), 7.37–7.32 (m, 3H), 7.25–7.14 (m, 9H), 7.02–6.98 (m, 1H), 6.74–6.71 (m, 4H), 6.34 (q, *J* = 4.67 Hz, 1H), 5.60 (br s, 2H), 5.17– 5.15 (m, 1H), 4.38–4.35 (m, 1H), 3.71 (s, 3H), 3.70 (s, 3H), 3.60–3.56 (m, 1H), 3.41–3.37 (m, 1H), 3.32–3.25 (m, 1H), 2.65–2.59 (m, 1H). **<sup>13</sup>C NMR (CDCl<sub>3</sub>, 100 MHz)**: δ (ppm) 158.64, 155.46, 152.87, 150.40, 149.64, 144.47, 140.46, 140.0, 135.55, 134.04, 130.05, 130.03, 128.10, 127.95, 127.04, 125.94, 121.14, 120.61, 115.72, 113.23, 87.06, 85.54, 83.03, 79.75, 63.15, 55.26, 35.80. **MS (HRMS, FAB<sup>+</sup>)**: Calculated for C<sub>37</sub>H<sub>34</sub>N<sub>6</sub>O<sub>7</sub> ([M + H]): *m/z* 674.2567; found: 675.2571.

**2-((Bis(4-methoxyphenyl)(phenyl)methoxy)methyl)-5-(6-((4-nitrophenyl)amino)-9H-purin-9-yl)tetrahydrofuran-3-ol (2h):**

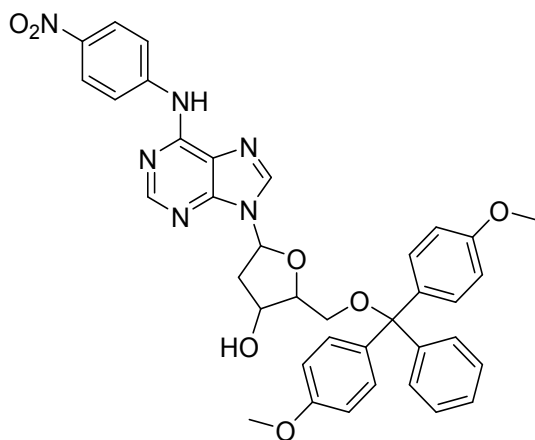

Yellow solid, Weight – 108 mg (89%); **<sup>1</sup>H NMR (400 MHz, CDCl<sub>3</sub>)**: δ 8.27 (s, 1H), 8.16–8.14 (m, 2H), 7.94 (s, 1H), 7.42–7.40 (m, 2H), 7.31–7.23 (m, 8H), 7.05–7.23 (m, 2H), 6.83–6.80 (m, 4H), 6.45 (q, 1H, *J* = 4.68 Hz), 5.66 (br s, 2H), 5.18–5.16 (m, 1H), 4.39–4.37 (m, 1H), 3.79 (s, 6H), 3.63–3.58 (m, 1H), 3.50–3.47 (m, 1H), 3.21–3.14 (m, 1H), 2.71–2.66 (m, 1H). **<sup>13</sup>C NMR (CDCl<sub>3</sub>, 100 MHz)**: δ (ppm) 161.94, 158.69, 155.44, 153.02, 149.61, 144.28, 141.96, 139.24, 135.38, 135.36, 130.02, 130.0, 128.04, 127.99, 127.13, 126.02, 120.33, 115.31, 113.26, 87.17, 84.95, 83.3, 78.78, 63.25, 55.24, 36.52. **MS (HRMS, FAB<sup>+</sup>)**: Calculated for C<sub>37</sub>H<sub>34</sub>N<sub>6</sub>O<sub>7</sub> ([M + H]): *m/z* 674.2567; found: 675.2569.

**4-((1-(5-((Bis(4-methoxyphenyl)(phenyl)methoxy)methyl)-4-hydroxytetrahydrofur-2-yl)-2-oxo-1,2-dihydropyrimidin-4-yl)amino)benzotrile (3f):**

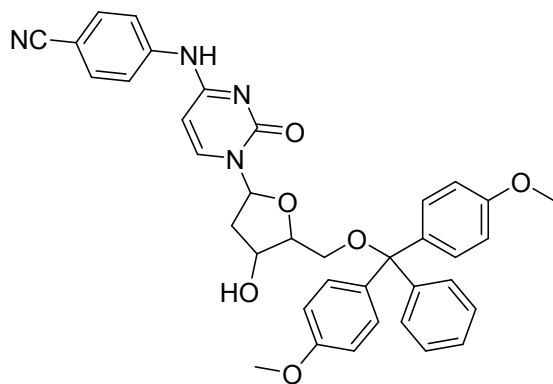

White solid, Weight – 109 mg (92%); **<sup>1</sup>H NMR (400 MHz, CDCl<sub>3</sub>)**: δ 7.84 (d, 1H, *J* = 7.84 Hz), 7.49 (d, 2H, *J* = 8.91 Hz), 7.40–7.31 (m, 2H), 7.29–7.26 (m, 9H), 6.84–6.81 (m, 5H), 6.35–6.32 (m, 1H), 5.57 (d, 1H, *J* = 7.41 Hz), 4.85–4.84 (m, 1H), 4.26–4.27 (m, 1H), 3.79–3.78 (m, 6H), 3.58–3.54 (m, 1H), 3.47–3.44 (m, 1H), 2.81–2.75 (m, 1H). **MS (HRMS, FAB<sup>+</sup>)**: Calculated for C<sub>37</sub>H<sub>34</sub>N<sub>4</sub>O<sub>6</sub> ([M + H]): *m/z* 630.2557; found: 631.2564.

**(E)-2-((9-((5-((Bis(4-methoxyphenyl)(phenyl)methoxy)methyl)-4-hydroxytetrahydrofuran-2-yl)-9H-purin-6-yl)amino)-5-(2-(pyridin-4-yl)vinyl)benzonitrile (2h):**

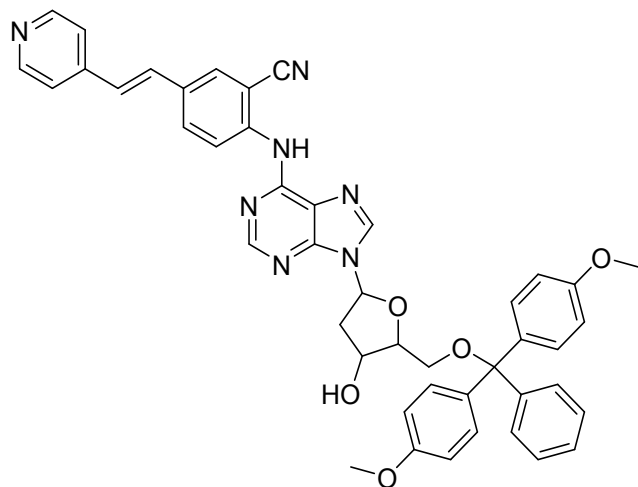

Pale yellow solid, Weight – 89 mg (65%); **<sup>1</sup>H NMR (400 MHz, DMSO-*d*<sub>6</sub>)**: δ 8.58 (d, *J* = 5.96 Hz, 2H), 8.36 (d, *J* = 4.93 Hz, 1H), 8.26–8.23 (m, 2H), 8.08–8.03 (m, 2H), 7.58–7.56 (m, 1H), 7.54–7.53 (m, 2H), 7.4–7.32 (m, 3H), 7.25–7.18 (m, 8H), 6.82–6.78 (m, 4H), 6.36 (t, *J* = 6.38 Hz, 1H), 5.36 (br s, 1H), 4.49–4.48 (m, 1H), 4.00–3.97 (q, 1H, *J* = 5.8 Hz, 1H), 3.72 (s, 6H), 3.17 (d, *J* = 4.64 Hz, 2H), 2.91–2.85 (m, 2H), 2.36–2.30 (m, 1H). **<sup>13</sup>C NMR (CDCl<sub>3</sub>, 100 MHz)**: δ (ppm) 158.46, 156.52, 152.96, 150.63, 149.81, 149.58, 145.36, 144.12, 139.90, 136.09, 136.02, 134.91, 134.82, 134.53, 134.5, 132.33, 130.27, 130.15, 130.27, 130.15, 130.09, 128.85, 128.83, 128.17, 128.14, 127.04, 124.88, 121.43, 119.73, 117.68, 117.48, 114.34,

113.54, 104.17, 86.22, 85.88, 83.79, 71.15, 64.52, 55.46, 46.14. **MS (HRMS, FAB<sup>+</sup>):** Calculated for C<sub>45</sub>H<sub>39</sub>N<sub>7</sub>O<sub>5</sub> ([M + H]): *m/z* 758.3013; found: 758.3019.

**(E)-4-(4-((9-(5-((Bis(4-methoxyphenyl)(phenyl)methoxy)methyl)-4-hydroxytetrahydrofuran-2-yl)-9H-purin-6-yl)amino)-3-cyanostyryl)-1-methylpyridin-1-ium iodide (3f):**

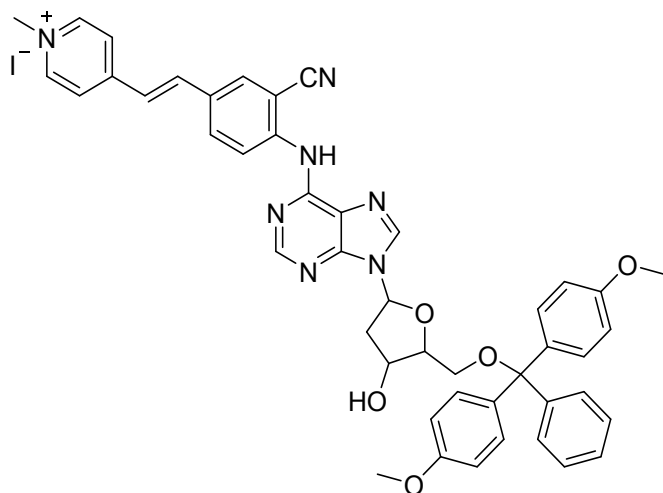

Orange red solid, Weight – 47 mg (943%); **<sup>1</sup>H NMR (400 MHz, DMSO-*d*<sub>6</sub>):** δ 8.91 (d, *J* = 6.11 Hz, 2H), 8.34 (d, *J* = 5.64 Hz, 1H), 8.23–8.19 (m, 3H), 8.14–8.08 (m, 2H), 7.99 (d, *J* = 16.44 Hz, 1H), 7.70–7.61 (m, 2H), 7.34–7.32 (m, 2H), 7.24–7.19 (m, 8H), 6.82–6.77 (m, 4H), 6.35 (t, *J* = 6.38 Hz, 1H), 5.36–5.35 (m, 1H), 4.48 (s, 1H), 4.29 (s, 3H), 3.98–3.97 (m, 1H), 3.72 (s, 6H), 3.17 (d, *J* = 4.64 Hz), 2.9–2.85 (m, 2H), 2.35–2.28 (m, 1H). **<sup>13</sup>C NMR (400 MHz, DMSO-*d*<sub>6</sub>):** δ (ppm) 158.96, 152.21, 149.57, 14, 2H 5.89, 145.35, 139.91, 137.45, 136.08, 136.02, 135.93, 133.39, 132.7, 103.14, 130.09, 128.17, 128.14, 127.05, 126.91, 126.0, 125.98, 124.33, 119.72, 118.09, 117.89, 114.13, 113.54, 113.53, 101.73, 87.96, 86.21, 85.87, 83.79, 71.14, 64.51, 55.48, 47.64, 46.25, 21.00. **MS (HRMS, FAB<sup>+</sup>):** Calculated for C<sub>46</sub>H<sub>42</sub>N<sub>7</sub>O<sub>5</sub> ([M + H]): *m/z* 772.3242; found: 772.3239.

**(E)-2-Fluoro-5-(2-(pyrid-4-yl)vinyl)benzonitrile (Y):**

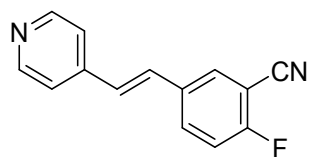

White solid, Weight – 556 mg (64%); **<sup>1</sup>H NMR (400 MHz, DMSO-*d*<sub>6</sub>):** δ 8.58–8.57 (m, 2H), 7.76–7.70 (m, 2H), 7.45 (d, *J* = 8.0 Hz, 2H), 7.26–7.19 (m, 2H), 6.98 (d, *J* = 18.0 Hz, 1H). **<sup>13</sup>C NMR (CDCl<sub>3</sub>, 100 MHz):** δ (ppm) 162.08 (*J* = 260.8 Hz), 150.35, 149.94, 143.50, 133.59 (*J* = 3.77 Hz), 133.13 (*J* = 8.79 Hz), 131.58,

129.50, 128.52 ( $J = 8.79$  Hz), 124.20, 120.96, 117.08 ( $J = 22.38$  Hz), 113.61, 102.08 ( $J = 22.38$  Hz); **MS (HRMS, FAB<sup>+</sup>)**: Calculated for C<sub>15</sub>H<sub>12</sub>N<sub>2</sub>FI ([M + H]):  $m/z$  224.0750; found: 224.0753.

**((E)-4-(3-Cyano-4-fluorostyryl)-1-methylpyridin-1-ium iodide (Z):**

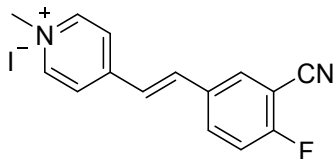

Yellow solid, Weight – 798 mg (95%); **<sup>1</sup>H NMR (400 MHz, DMSO-*d*<sub>6</sub>)**:  $\delta$  8.92 (d,  $J = 7.48$  Hz, 2H), 8.35 (dd,  $J_1 = 3.97$  Hz,  $J_2 = 2.15$  Hz, 1H), 8.20 (d,  $J_1 = 6.61$  Hz, 2H), 8.16–8.12 (m, 1H), 8.01 (d,  $J = 17.84$  Hz, 1H), 7.72–7.63 (m, 2H), 4.30 (s, 3H). **<sup>13</sup>C NMR (CDCl<sub>3</sub>, 100 MHz)**:  $\delta$  (ppm) 163.27 ( $J = 248.4$  Hz), 152.18, 145.91, 137.44, 136.05 ( $J = 9.66$  Hz), 133.38, 128.24, 126.90, 120.0, 117.08 ( $J = 2.07$  Hz), 124.31, 118.01 ( $J = 20.31$  Hz), 114.15, 101.65 ( $J = 20.31$  Hz), 47.63; **MS (HRMS, FAB<sup>+</sup>)**: Calculated for C<sub>15</sub>H<sub>12</sub>N<sub>2</sub>FI ([M + H]):  $m/z$  239.0979; found: 239.0983.

**<sup>6</sup>N-(4CyanoPhenyl)Adeneine:**

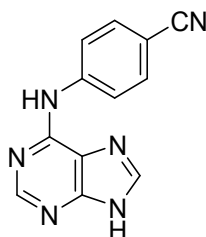

White solid, Weight – 77 mg (65%); **<sup>1</sup>H NMR (400 MHz, DMSO-*d*<sub>6</sub>)**:  $\delta$  8.47 (s, 1H), 8.25 (s, 1H), 8.20 (d,  $J_1 = 6.61$  Hz, 2H), 7.83–7.81(m, 4H), 7.24 (d,  $J = 8.0$  Hz, 2H). **<sup>13</sup>C NMR (CDCl<sub>3</sub>, 100 MHz)**:  $\delta$  (ppm) 160.77, 155.31, 151.26, 149.23, 140.98, 134.85, 119.71, 119.48, 116.86, 103.92; **MS (HRMS, FAB<sup>+</sup>)**: Calculated for C<sub>15</sub>H<sub>12</sub>N<sub>2</sub>FI ([M + H]):  $m/z$  237.0810; found: 237.0816.

### 3. Discussion of procedure for Fluoroarylation of Deoxyadenosine Nucleosides

When using K<sub>2</sub>CO<sub>3</sub> as the base and DMF as the solvent and heating at 90 °C for 24 h, no product was obtained (Table S1, entry 1). Suspecting that the free OH groups were the reason behind the failed reaction, we protected them with *tert*-butyldimethylsilyl groups and repeated the reaction, but again observed no product (Table S1, entry 2). Next, we changed the base to NaH (60% in mineral oil) to ensure more effective deprotonation of the amino group of the deoxyadenosine moiety, but found only that complete degradation of the starting material had occurred (Table S1, entry 3). Changing the solvent to DMSO also led to no reaction (Table S1, entry 4). Gratifyingly, when we changed the base to K<sub>3</sub>PO<sub>4</sub> (which resembles the phosphate backbone of a nucleic acid) in DMSO at 90 °C, the arylation did

proceed, but the  $^1\text{H}$  NMR spectrum of the product **2a1** (Supporting Information, Fig. S41) suggested that multiple arylation had occurred, on both the OH groups at the 5' and 3' ends (Table S1, entry 5). When we applied a reported procedure for the arylation of unprotected deoxyadenosine using *p*-bromobenzaldehyde,<sup>31</sup> we observed very slow conversion and a low yield (ca. 10%, by TLC; Table S1, entry 6). To our delight, protecting the 5' end with a DMT group and reacting with *p*-fluorobenzaldehyde in DMSO using  $\text{K}_3\text{PO}_4$  as the base provided the product in 84% yield after 24 h (Table S1, entry 7). Increasing the temperature and shortening the reaction time to 16 h resulted in a slightly improved yield (86%; Table S1, entry 8).

When adenine alone was subjected to standard reaction condition, the  $^6\text{N}$ -arylated product was obtained solely.

#### 4. Table S1: Control Table for N-Arylation of Deoxyadenosine Derivatives

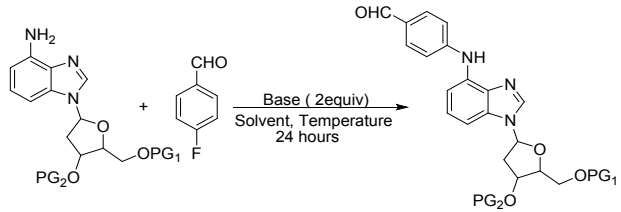

| Entry          | Protecting Group (PG) | Base                    | Solvent | Temp. (°C) | Yield <sup>a</sup> (%) |
|----------------|-----------------------|-------------------------|---------|------------|------------------------|
| 1              | PG1-H, PG2-H          | $\text{K}_2\text{CO}_3$ | DMF     | 90         | 0                      |
| 2              | PG1-TBS, PG2-TBS      | $\text{K}_2\text{CO}_3$ | DMF     | 90         | 0                      |
| 3              | PG1-TBS, PG2-TBS      | NaH (60%)               | DMF     | RT-90      | 0                      |
| 4              | PG1-H, PG2-H          | $\text{K}_2\text{CO}_3$ | DMSO    | 90         | 0                      |
| 5              | PG1-H, PG2-H          | $\text{K}_3\text{PO}_4$ | DMSO    | 90         | 0 <sup>d</sup>         |
| 6 <sup>b</sup> | PG1-H, PG2-H          | $\text{K}_3\text{PO}_4$ | DMSO    | 90         | ca. 10                 |
| 7              | PG1-DMT, PG2-H        | $\text{K}_3\text{PO}_4$ | DMSO    | 90         | 84                     |
| 8 <sup>c</sup> | PG1-DMT, PG2-H        | $\text{K}_3\text{PO}_4$ | DMSO    | 110        | 86                     |

<sup>a</sup>Isolated yield. <sup>b</sup>*p*-Bromobenzaldehyde (1.2 equiv), DMEDA (1 equiv), and CuI (1 equiv) were used.

<sup>c</sup>Reaction time was 16 h. <sup>d</sup>Diarylated side product obtained as the major product (62%;  $^1\text{H}$  NMR, Fig. S51).

## 5. Photophysical properties of the Arylated DMT nucleosides

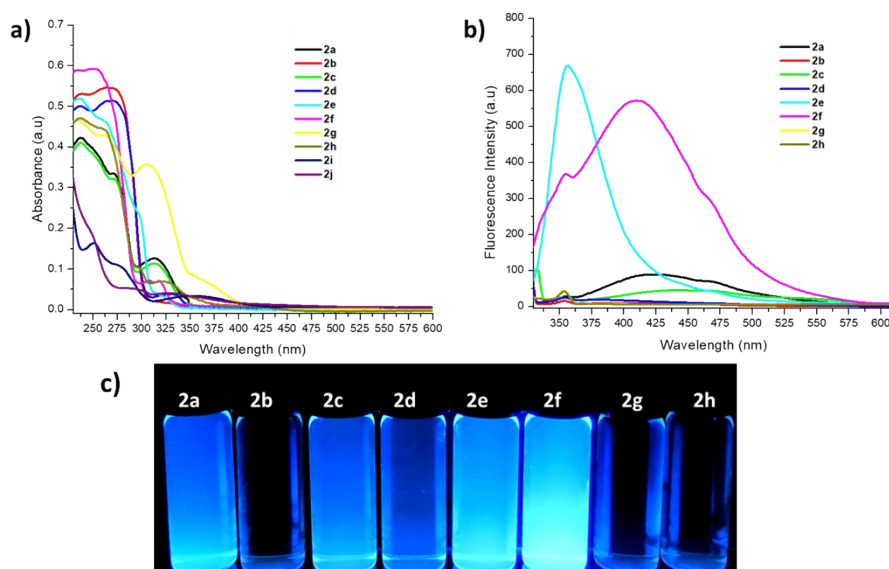

**Figure S1:** (a) UV-Vis absorption and (b) fluorescence spectra of the arylated DMTdA derivatives **2a–h** (16 mM) in DMSO. (c) Photograph of solutions of the arylated DMT deoxyadenosine derivatives **2a–h** (16 mM) in DMSO under long-range UV light (365 nm).

## 6. Table S2: Arylation of Deoxyadenosine-, Deoxycytosine-, and Deoxyguanosine-Containing Polythymine Oligonucleotides with Z in Phosphate Buffer

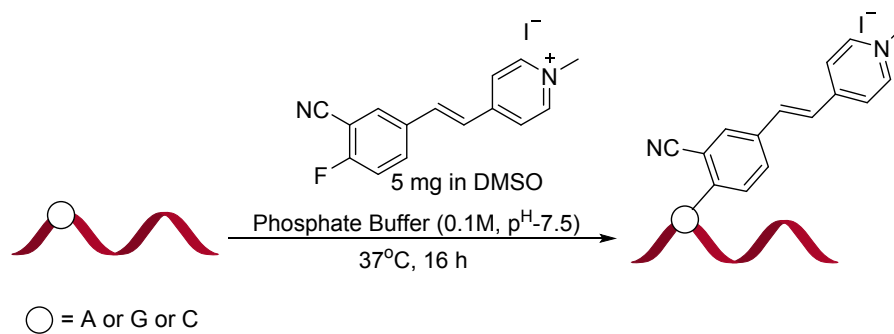

| Entry | Oligonucleotide                                                   | Yield (%) <sup>a</sup> | SM (%) <sup>b</sup> |
|-------|-------------------------------------------------------------------|------------------------|---------------------|
| 1     | 5'-PO <sub>4</sub> <sup>3-</sup> -ATTTTTTTTTTTTTT ( <b>5a</b> )   | 64                     | 36                  |
| 2     | 5'-PO <sub>4</sub> <sup>3-</sup> -CTTTTTTTTTTTTTTT ( <b>7a</b> )  | 2                      | 98                  |
| 3     | 5'-PO <sub>4</sub> <sup>3-</sup> -GTTTTTTTTTTTTTTTT ( <b>7b</b> ) | 5                      | 95                  |

<sup>a</sup>Product yield determined by relative integration of peaks in HPLC trace at 260 nm (Figs. S26–S28). <sup>b</sup>SM = Recovered starting material (oligonucleotide). Conditions: Oligonucleotide (100 pmol/μL, 50 μL) and **Z** (5 mg) in phosphate buffer (0.1M, pH 7.5, 200 μL) at 37 °C for 16 h.



7. Table S3: Fluoroarylation of Oligonucleotides with probes X, Y and Z.

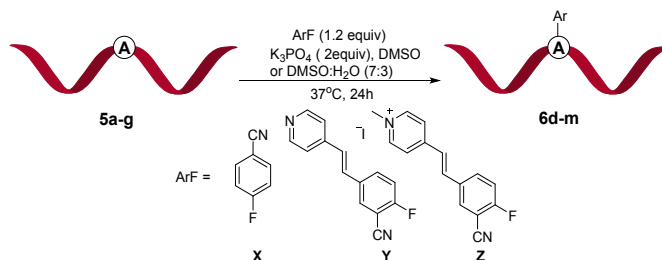

| Entry | Oligonucleotide                                                       | Group                                                                               | Yield of 6a-k (%) <sup>a</sup> | SM (%) | Calculated MALDI | Observed MALDI <sup>b</sup> |
|-------|-----------------------------------------------------------------------|-------------------------------------------------------------------------------------|--------------------------------|--------|------------------|-----------------------------|
| 1     | 5'-PO <sub>4</sub> <sup>3-</sup> -ATTTTTTTTTTTTTT (5a)                | 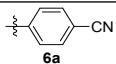   | 75                             | 25     | 4692.84          | 4692.71                     |
| 2     | 5'-PO <sub>4</sub> <sup>3-</sup> -ATTTTTTATTTTTT (5b)                 |    | 73                             | 27     | 4804.85          | 4802.17                     |
| 3     | 5'-PO <sub>4</sub> <sup>3-</sup> -ATTTTTTATTTTTTA (5c)                |    | 70                             | 30     | 4916.86          | 4908.71                     |
| 4     | 5'-PO <sub>4</sub> <sup>3-</sup> -TTTTTTTTTTTTTATTTTTATTTT TATTT (5d) |   | 72                             | 28     | 9480.39          | 9425.04                     |
| 5     | 5'-PO <sub>4</sub> <sup>3-</sup> -ATTTTTTTTTTTTTT (5a)                |  | 77                             | 16     | 4796.08          | 4801.00                     |
| 6     | 5'-PO <sub>4</sub> <sup>3-</sup> -ATTTTTTATTTTTT (5b)                 |  | 73                             | 15     | 5010.48          | 5009.32                     |
| 7     | 5'-PO <sub>4</sub> <sup>3-</sup> -ATTTTTTATTTTTTA (5c)                |  | 59                             | 13     | 5226.58          | 5223.11                     |
| 8     | 5'-PO <sub>4</sub> <sup>3-</sup> -ATTTTTTTTTTTTTT (5a)                |  | 99                             | 0      | 4810.83          | 4806.33                     |
| 9     | 5'-PO <sub>4</sub> <sup>3-</sup> -ATTTTTTATTTTTT (5b)                 |  | 99                             | 0      | 5041.41          | 5046.72                     |
| 10    | 5'-PO <sub>4</sub> <sup>3-</sup> -ATTTTTTATTTTTTA (5c)                |  | 99                             | 0      | 5271.70          | 5272.98                     |

|                 |                                                                                                      |                                                                                     |    |    |         |         |
|-----------------|------------------------------------------------------------------------------------------------------|-------------------------------------------------------------------------------------|----|----|---------|---------|
| 11 <sup>c</sup> | 5'-PO <sub>4</sub> <sup>3-</sup> - GCGTTACGTGTGCTC - 3' (5e)                                         | 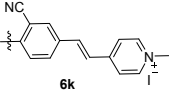   | 89 | 11 | 4874.44 | 4875.31 |
| 12 <sup>c</sup> | 5'-PO <sub>4</sub> <sup>3-</sup> - GCGTTACGTGTGCTC - 3' (5e) (ds DNA with complementary sequence)    |    | 0  | 99 | -       | -       |
| 13 <sup>c</sup> | 5'-PO <sub>4</sub> <sup>3-</sup> - GGG CGC GGC AGC TTT CGT TTG GCG CCC- 3'(5f) (Hairpin 1)           |    | 99 | 0  | 8595.56 | 8601.16 |
| 14 <sup>c</sup> | 5'-PO <sub>4</sub> <sup>3-</sup> - GGG CAC GGC GGC TTT CGT TTG GTG CCC - 3'(5f) (Hairpin 2)          |    | 0  | 99 | -       | -       |
| 15 <sup>c</sup> | 5'-PO <sub>4</sub> <sup>3-</sup> - TG TGG GTG GGT AGG GTG GGT TT- 3' (5g) (G-Quadruplex)             |    | 89 | 0  | 7264.3  | 7266.67 |
| 16 <sup>d</sup> | 5'-PO <sub>4</sub> <sup>3-</sup> - GCG GCG AGC GCG GCG -3' (5h) (ssRNA)                              |  | 39 | 0  | 5199.67 | 5205.07 |
| 17 <sup>d</sup> | 5'-PO <sub>4</sub> <sup>3-</sup> - GCG GCG AGC GCG GCG -3' (5h) (ds RNA with complementary sequence) |  | 0  | 99 | -       | -       |

SM = Recovered Starting Oligonucleotide, <sup>a</sup>Yield = Product yield determined by relative integration in HPLC at 260 nm (Fig. S8-S25). <sup>b</sup>Fig. S29-S41. Condition: 5 mM of Oligonucleotide (in DMSO), 5mM of K<sub>3</sub>PO<sub>4</sub>, 10mM of p-fluoroarylonitrile in DMSO or DMSO: H<sub>2</sub>O (7:3) at 37°C 24h. <sup>c</sup>Oligonucleotide (100 pmol/μL, 50 μL) and **Z** (5 mg) in phosphate buffer (0.1M, pH 7.5, 200 μL) at 37 °C for 24 h. <sup>d</sup>Oligonucleotide (100 pmol/μL, 50 μL) and **Z** (5 mg) in phosphate buffer (0.1M, pH 7.5, 200 μL) and DPEC water 100 μL at 37 °C for 8 h

## 8. UV-Vis Spectroscopy of the Arylated Oligonucleotides

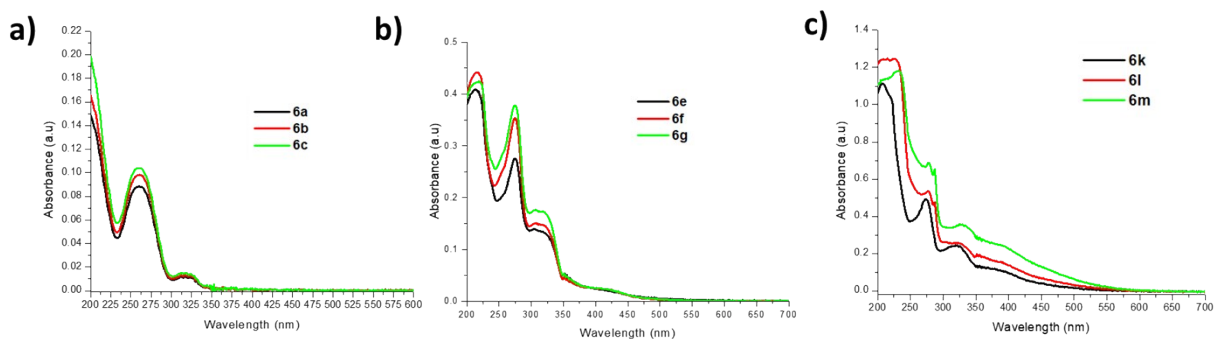

Figure S2: (a) UV-Vis absorption spectra of **6a–j** (1  $\mu$ M each).

## 9. Excitation dependent emission of **6h**

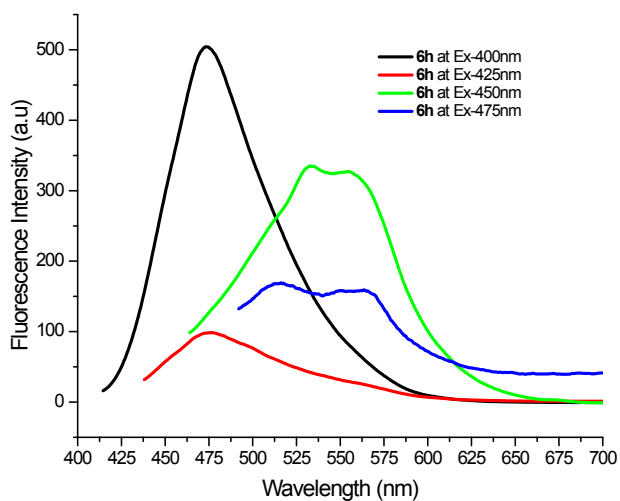

Figure S3: Excitation dependent fluorescence emission of oligonucleotide **6h**.

## 10. PAGE of 6a-c

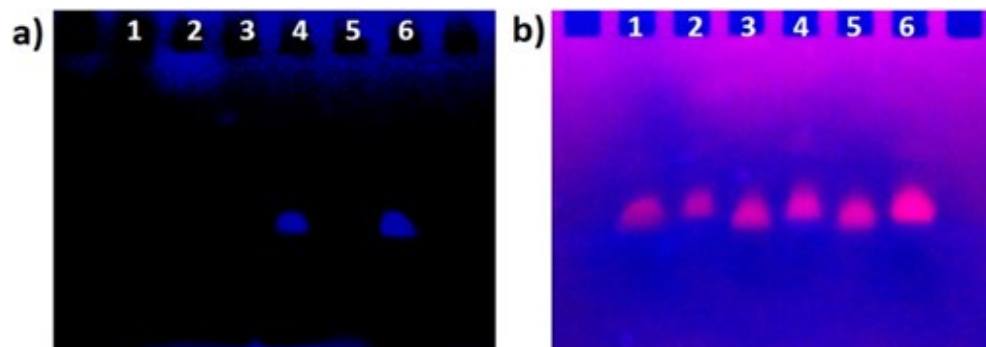

**Figure S4:** PAGE analysis of arylated oligonucleotides (a) before and (b) after staining with EtBr. Lane 1: 5a; lane 2: 6a; lane 3: 5b; lane 4: 6b; lane 5: 5c; lane 6: 6c. Note: PAGE gel analysis was performed using a 0.1 mM concentration of the oligonucleotides.

## 11. Time dependent fluorescence to know the optimum reaction time

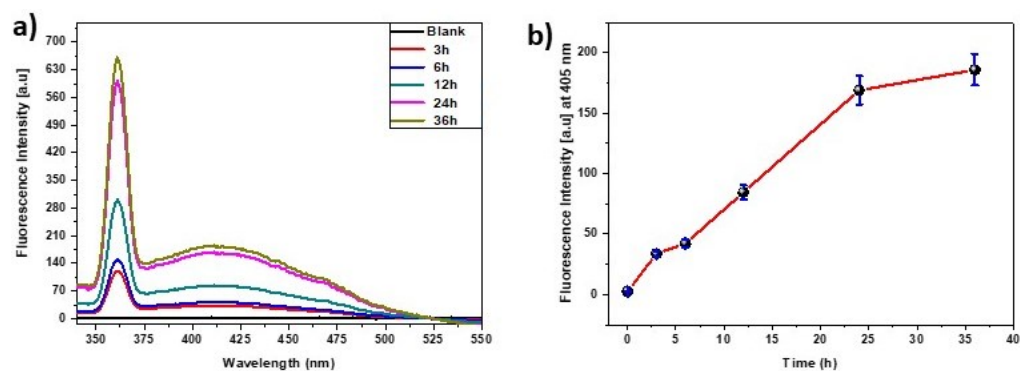

**Figure S5:** (a) Time-dependent fluorescence spectra of **6a** (0.1 mM) at 320 nm ( $I_{ex}$ ). (b) Fluorescence intensity at 405 nm ( $I_{em}$ ) plotted with respect to time (error bound:  $\pm 5\%$ ).

## 12. Primer Extension of Arylated Oligonucleotide 6d and Corresponding Melting Point Data

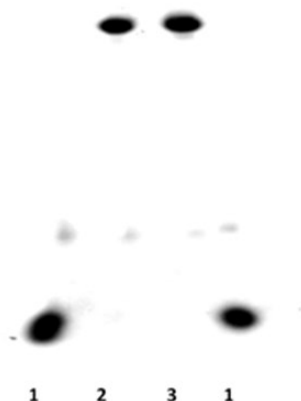

**Figure S6.**  $^{32}\text{P}$  labeling experiment characterization for primer extension on arylated oligonucleotide 6d using  $A_{14}$  as primer. Lane 1:  $^{32}\text{P}$ - $A_{14}$  (see the supporting information for detailed  $^{32}\text{P}$  labeling and duplex formation with 5d and 6d); Lane 2:  $^{32}\text{P}$ - $A_{14}$ :5d duplex primer extension using *nfu-special* DNA polymerase (2U) at 37°C for 24h; Lane 3:  $^{32}\text{P}$ - $A_{14}$ :6d duplex primer extension using *nfu-special* DNA polymerase (2U) at 37°C for 24h. All polymerase extensions were stopped by adding twice the amount of stop buffer (10 mM EDTA, 10 mM NaOH, 0.1% xylene cyanol, and 0.1% bromophenol blue in formamide). All product solutions were loaded onto a 20% denaturing polyacrylamide gel.

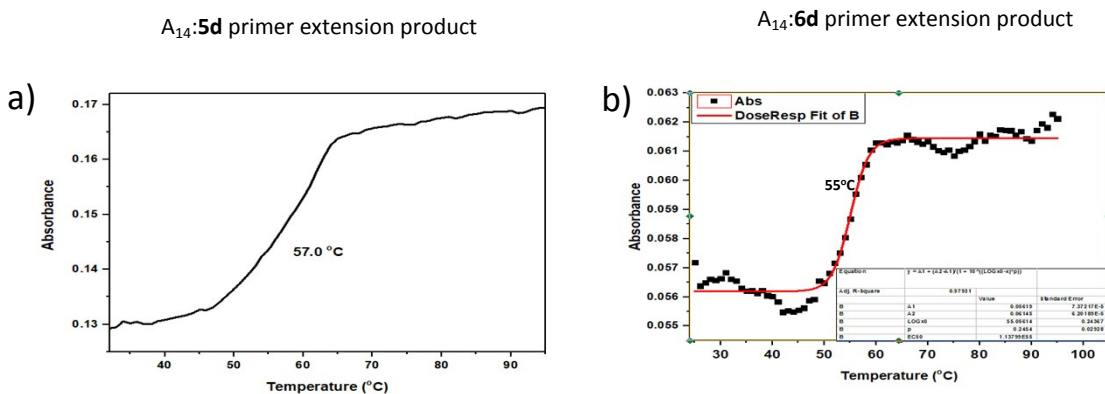

**Figure S7:** Melting temperatures of primer extension products using (a)  $A_{14}$  primer:5d duplex and (b)  $A_{14}$  primer:6d duplex. Duplexes were prepared by annealing 0.1 mM solutions of each at 95 °C and primer extensions were executed using dNTPs (2 mM) and *nfu-special* DNA polymerase (2U) at 37 °C for 24 h and purified using a QIAquick nucleotide removal kit. Melting temperatures were measured at 260 nm over the temperature range from 25 to 95 °C at a heating rate of 1 °C/min.

### 13. HPLC Data of Arylated Oligonucleotides

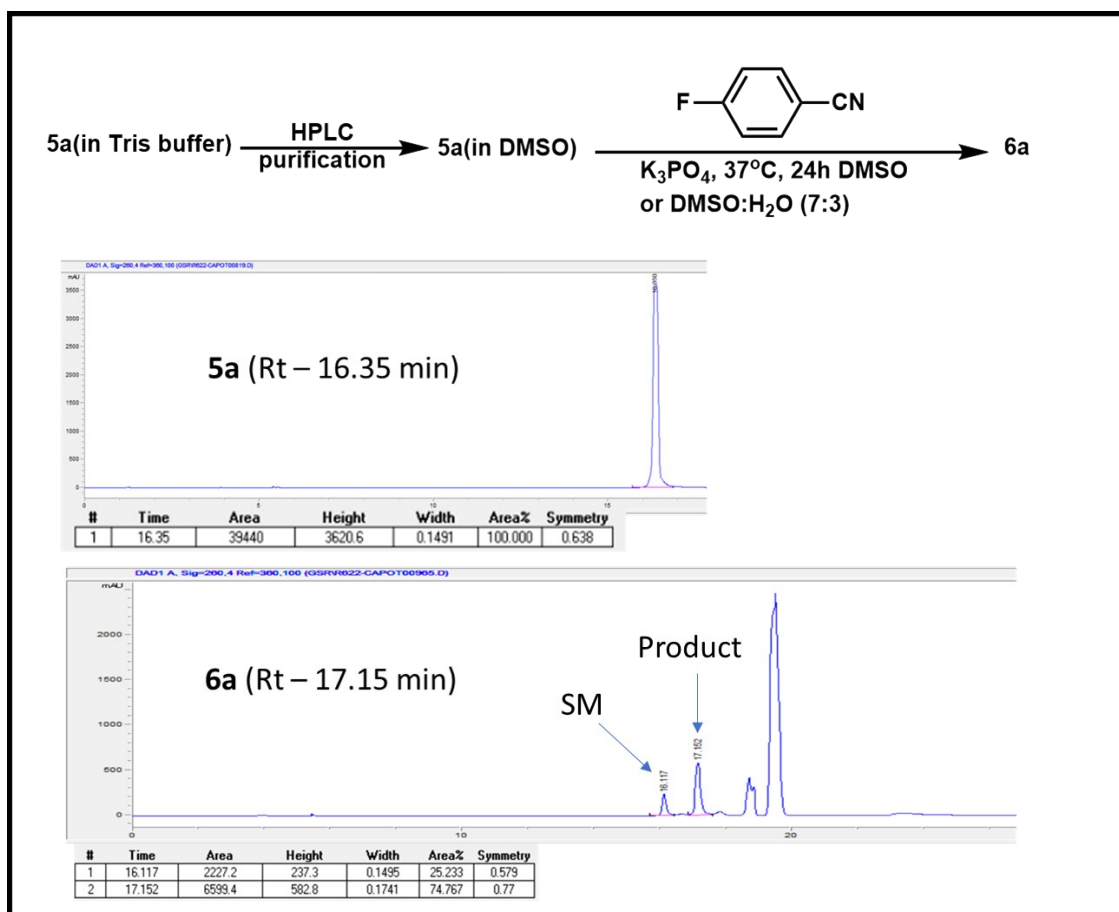

Figure S8: HPLC traces of **5a** and its corresponding product **6a**.

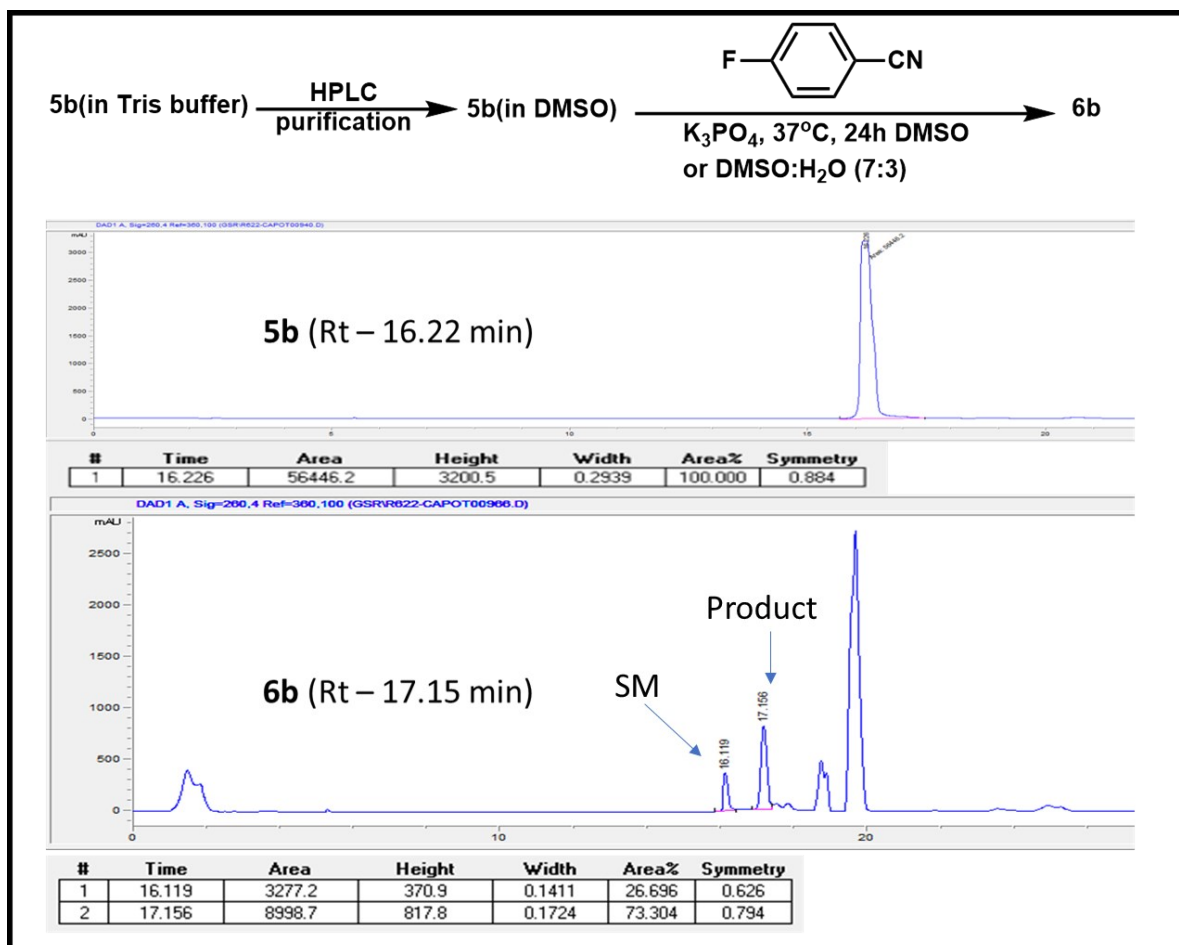

**Figure S9:** HPLC traces of **5b** and its corresponding product **6b**.

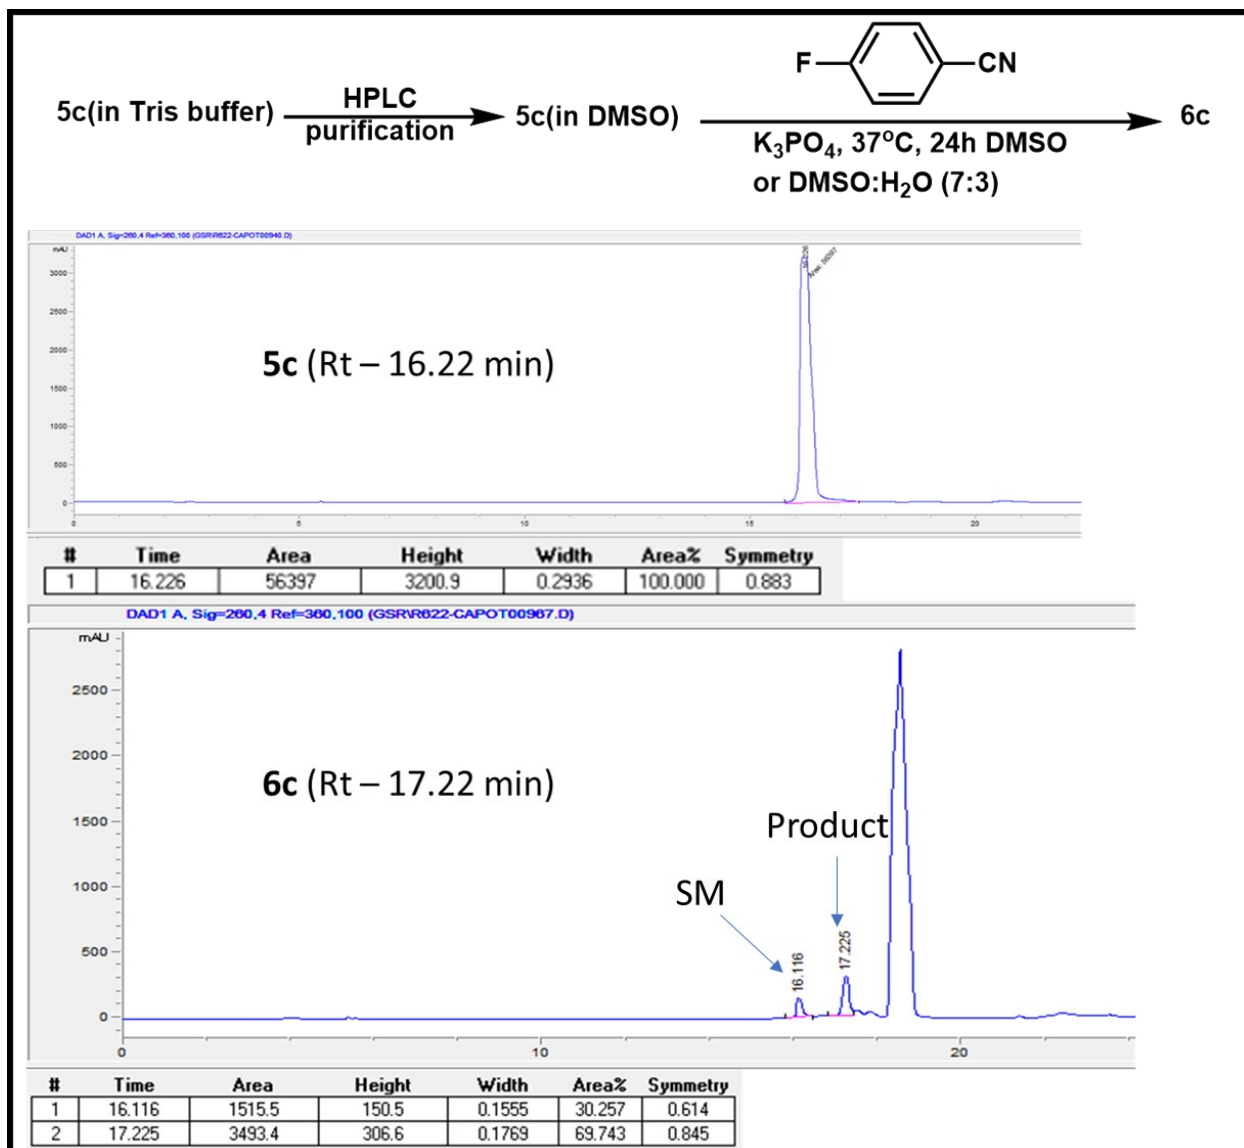

**Figure S10:** HPLC traces of **5c** and its corresponding product **6c**.



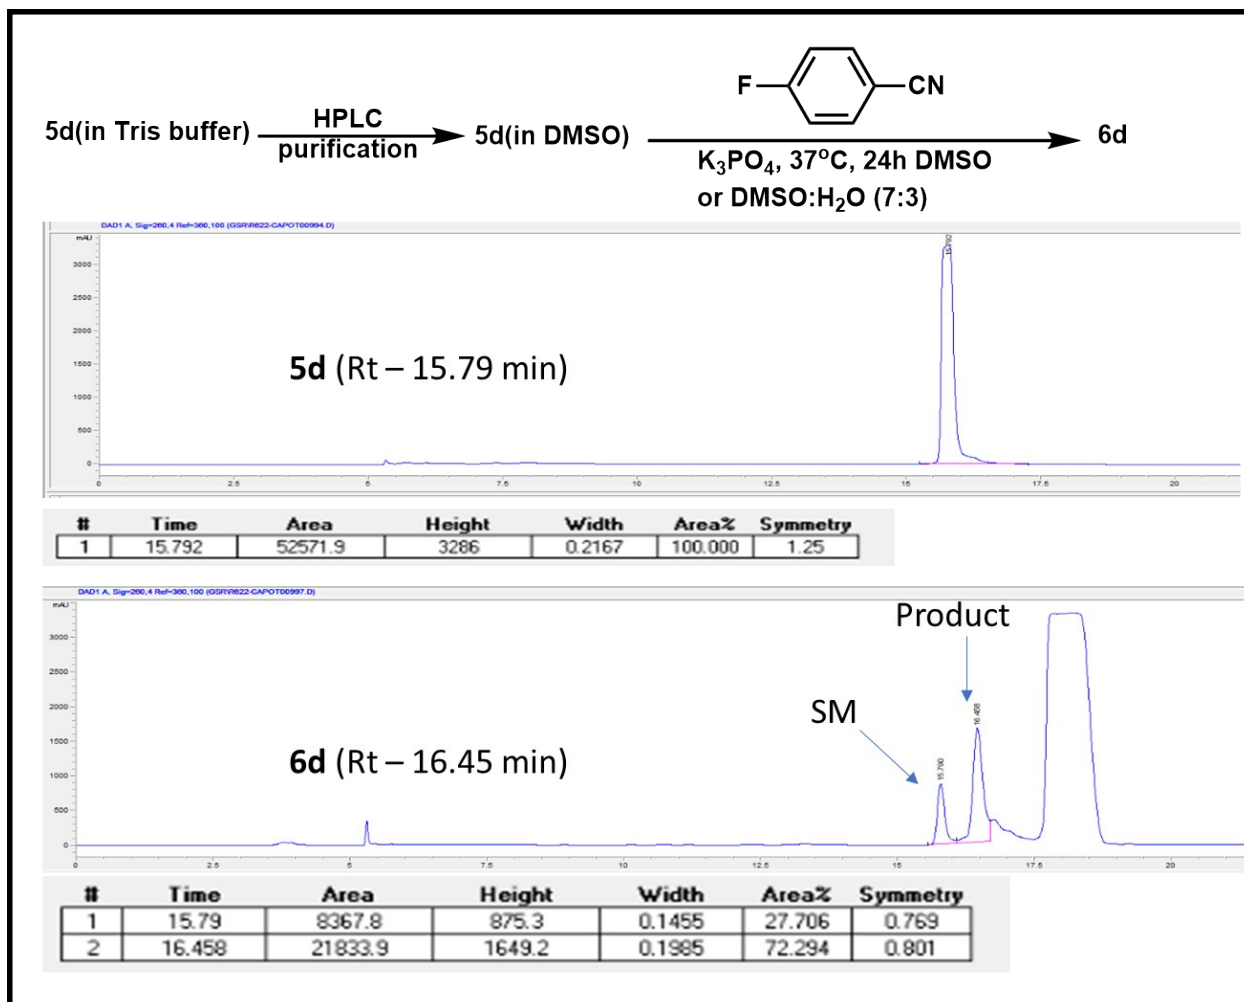

Figure S11: HPLC traces of **5d** and its corresponding product **6d**.

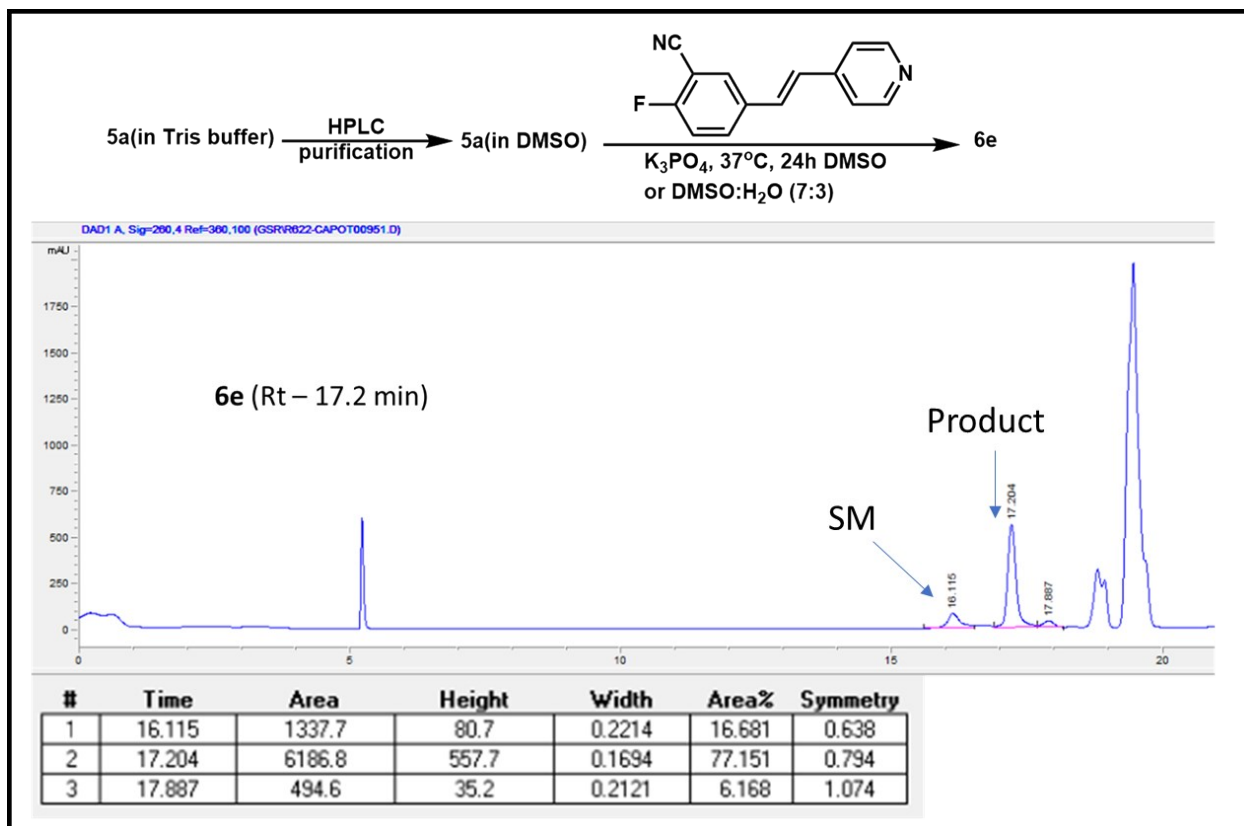

**Figure S12:** HPLC trace of product **6e**.

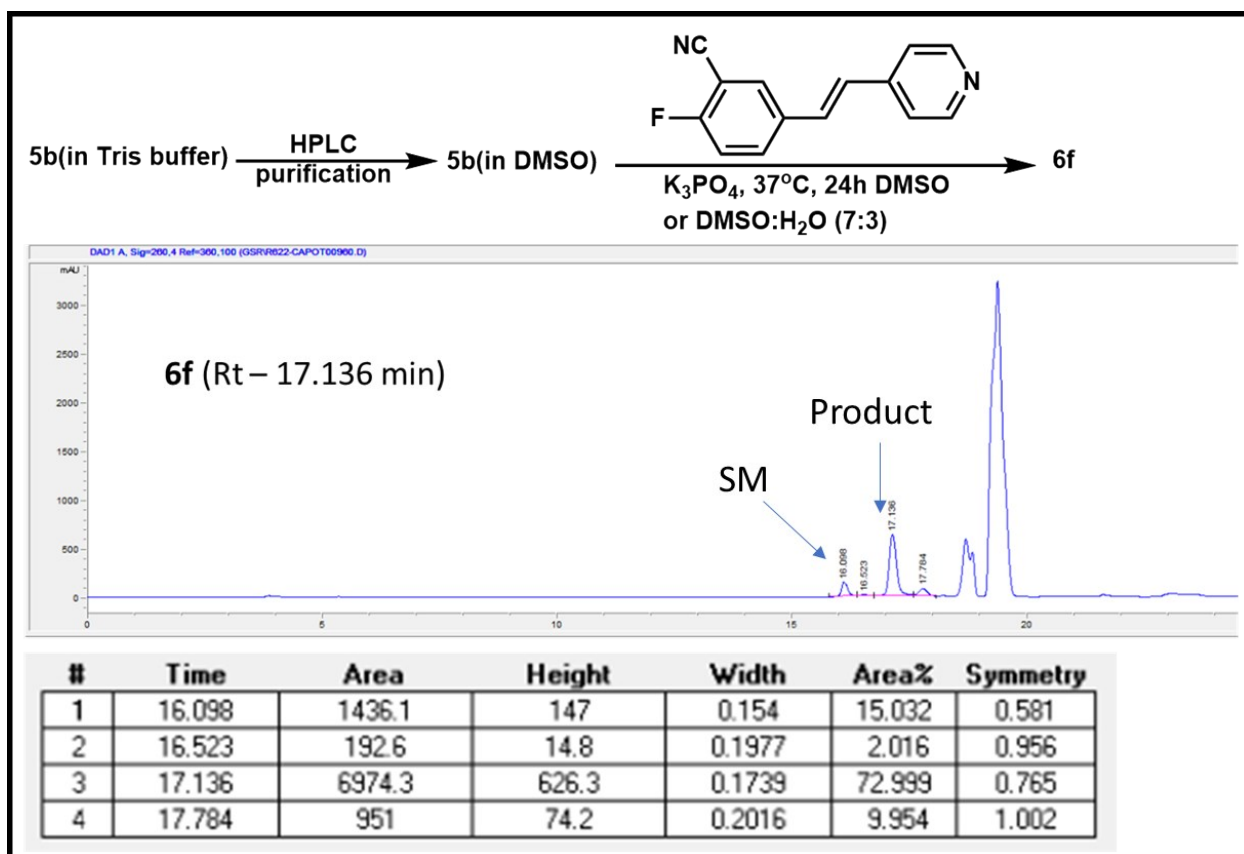

Figure S13: HPLC trace of product **6f**.

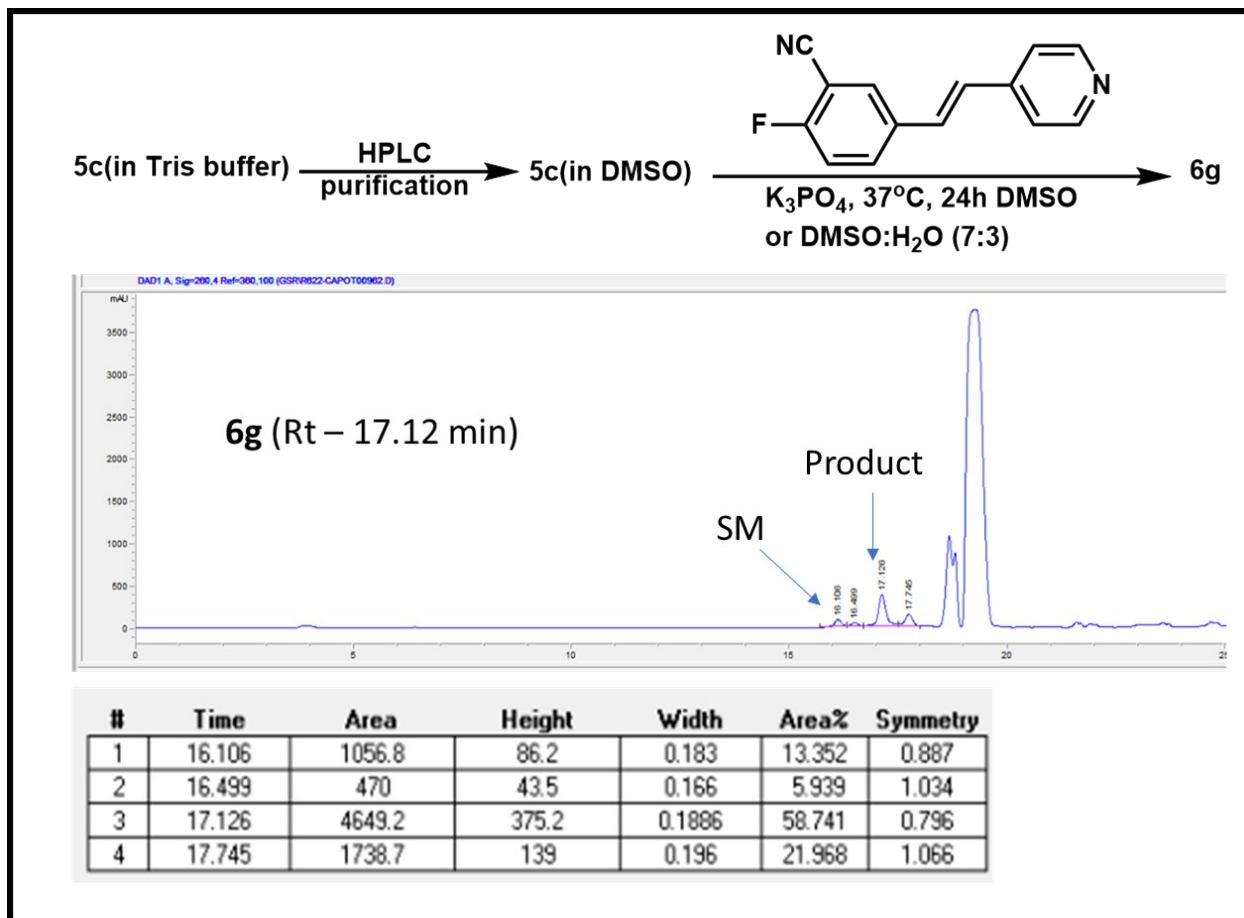

**Figure S14:** HPLC trace of product **6g**.

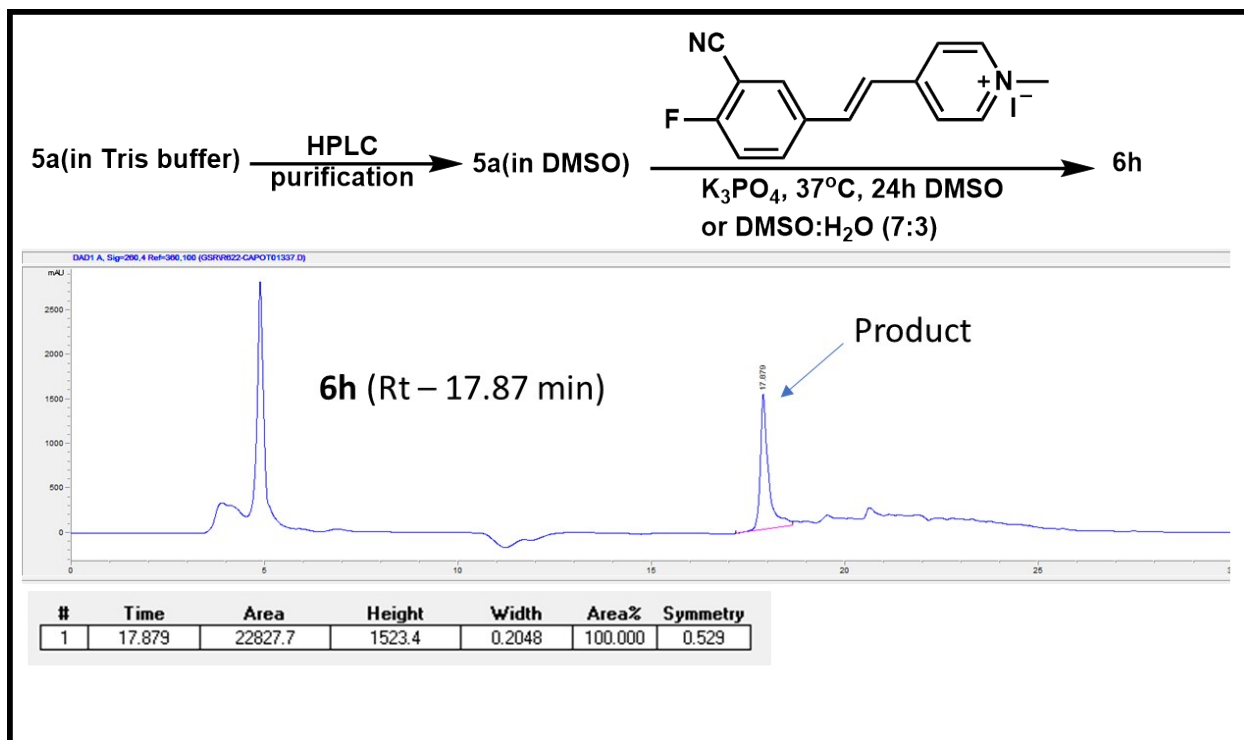

Figure S15: HPLC trace of product 6h.

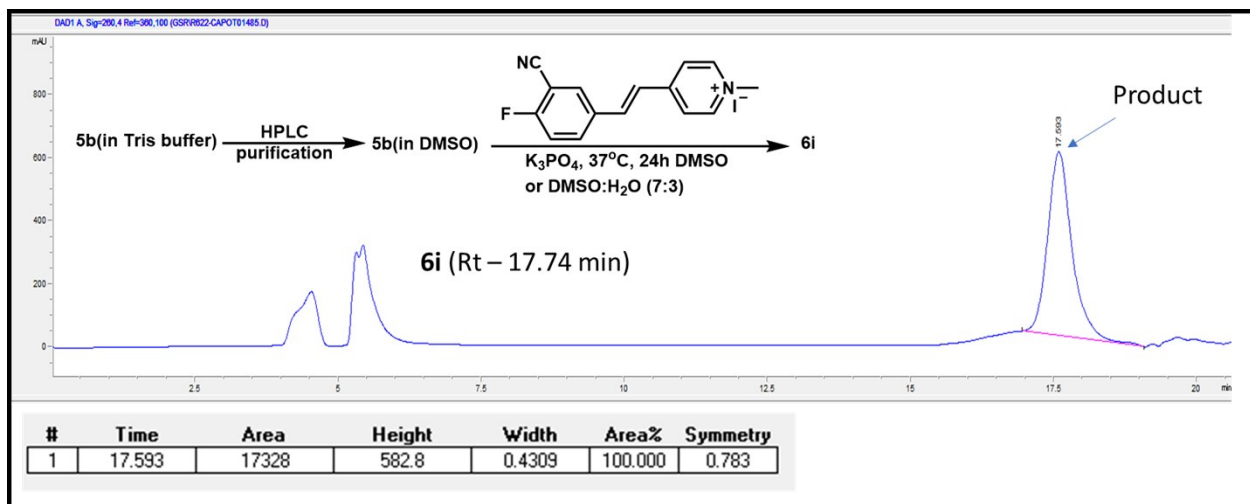

Figure S16: HPLC trace of product 6i.

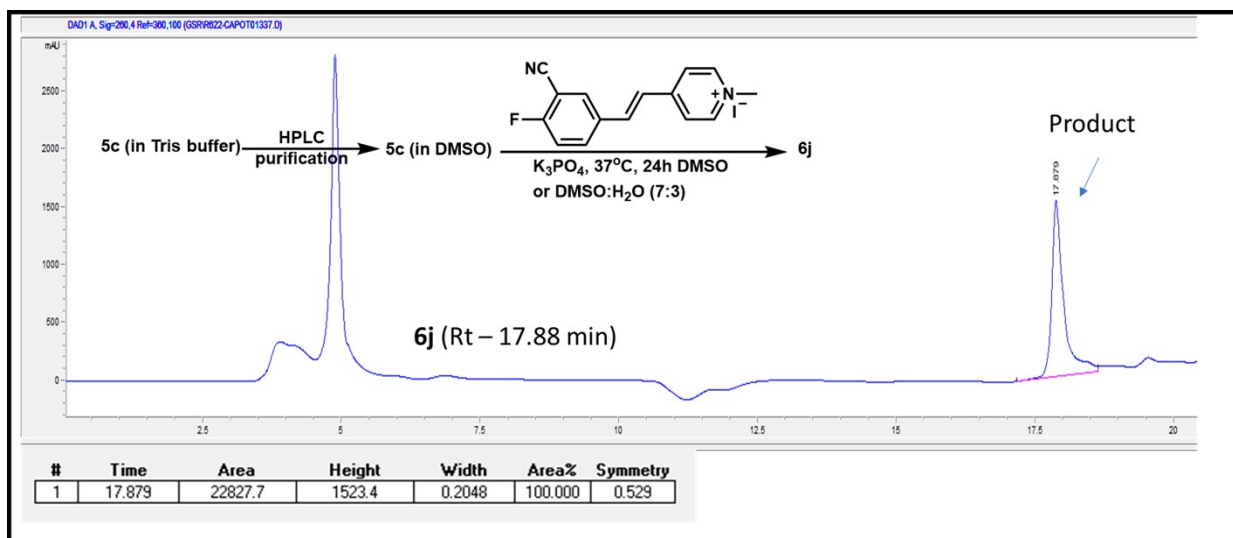

Figure S17: HPLC trace of product **6j**.

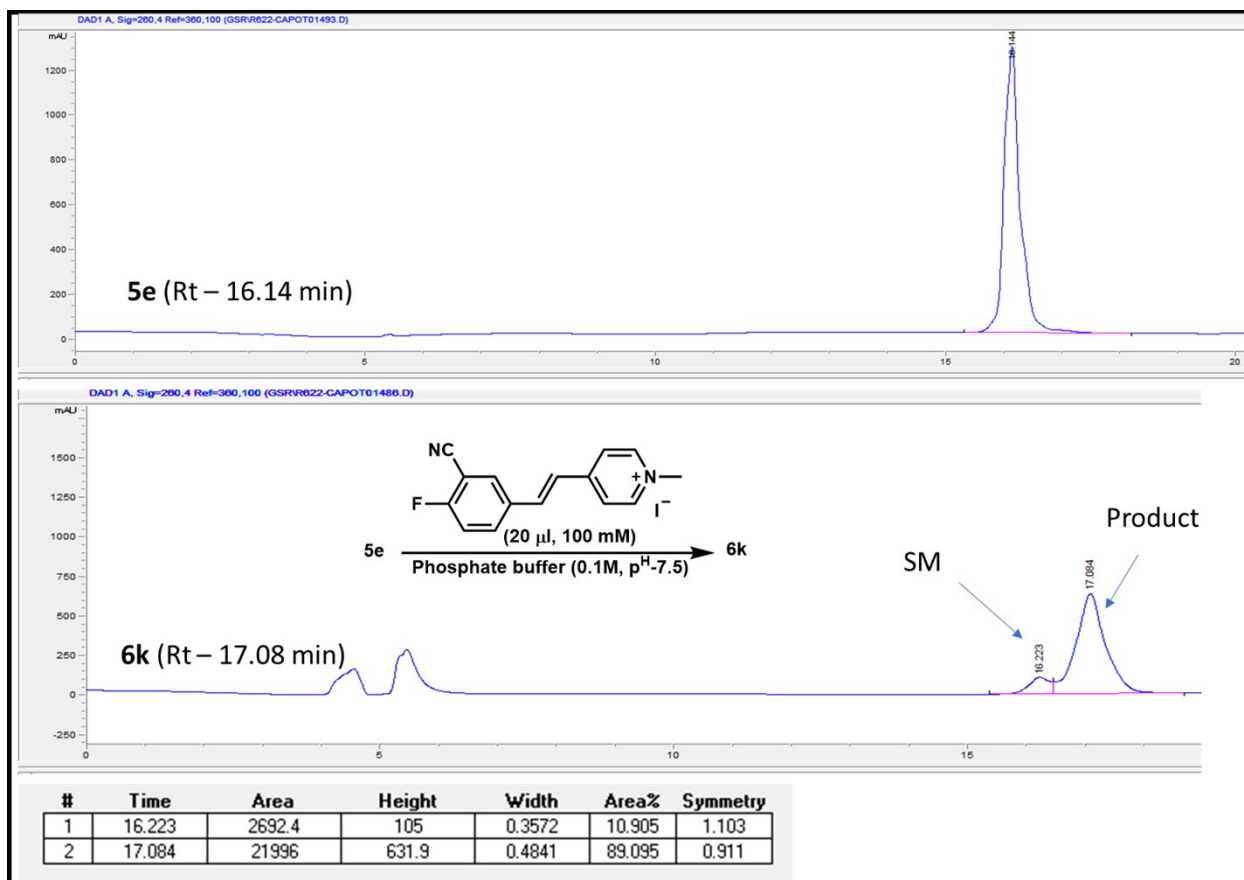

Figure S18: HPLC trace of single strand DNA **6k**.

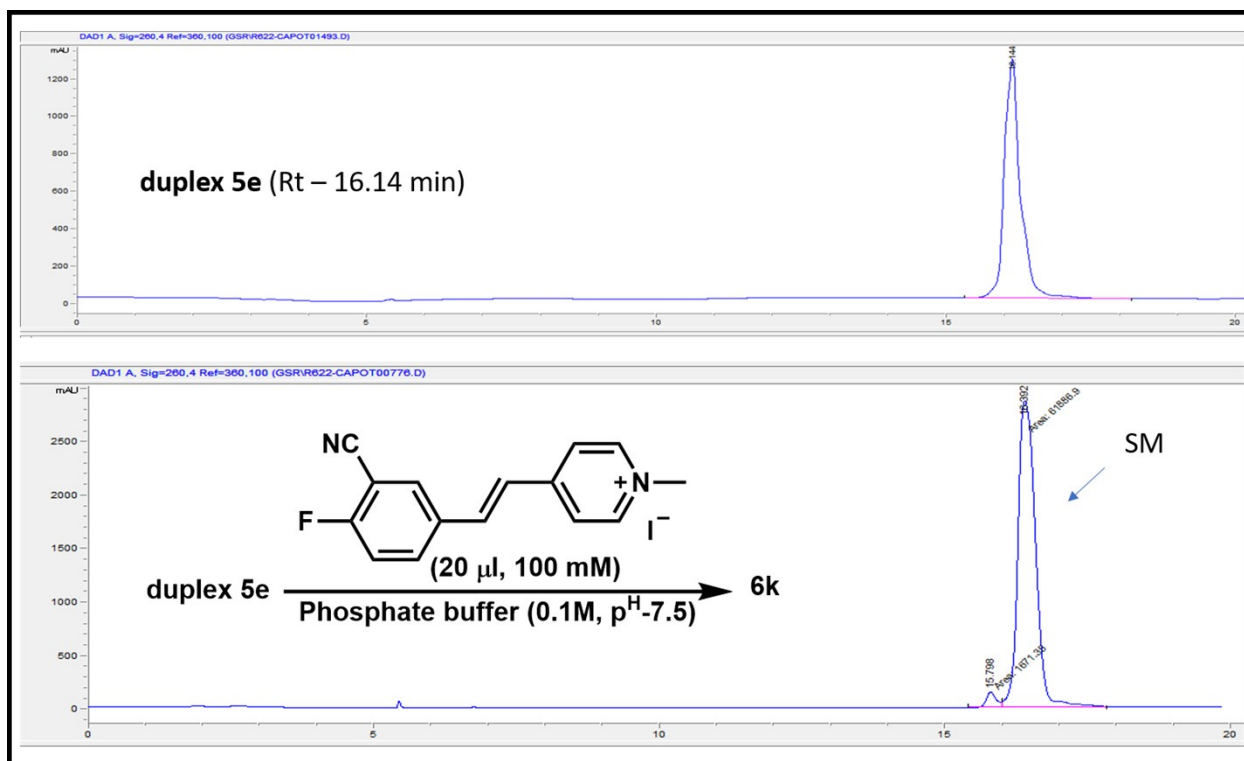

Figure S19: HPLC trace for duplex DNA 6k (No reaction).

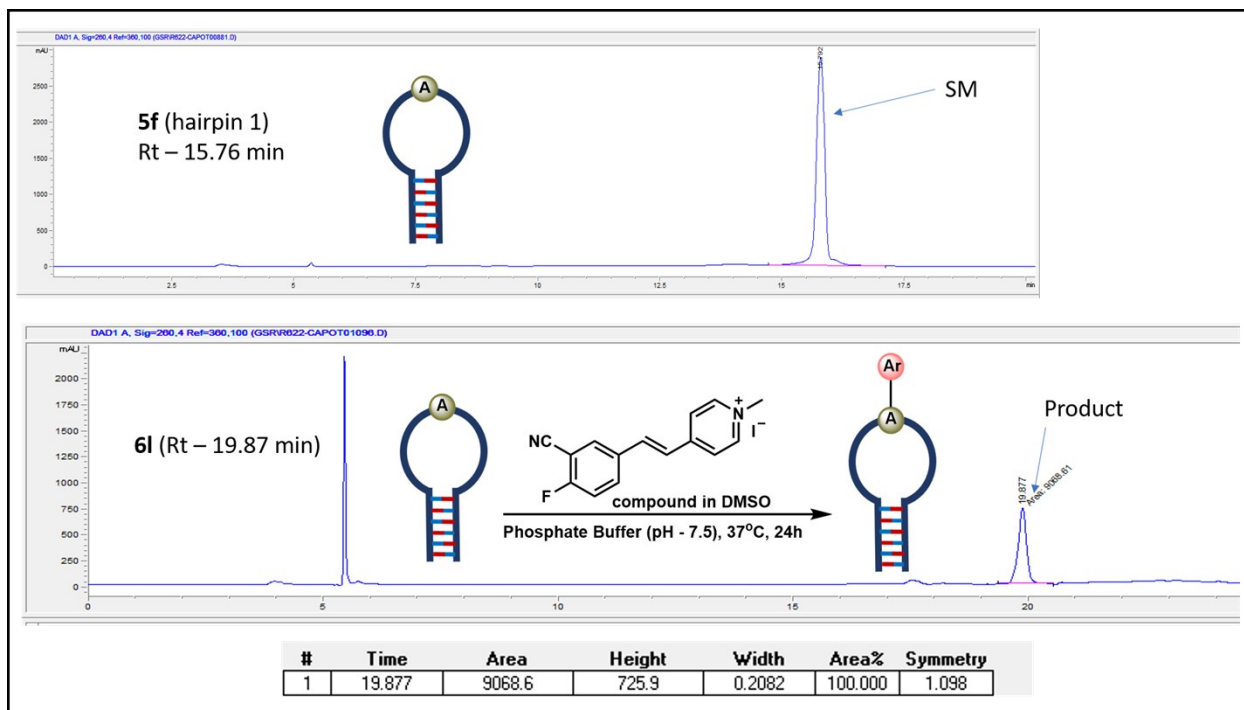

Figure S20: HPLC trace for hairpin loop 6l.

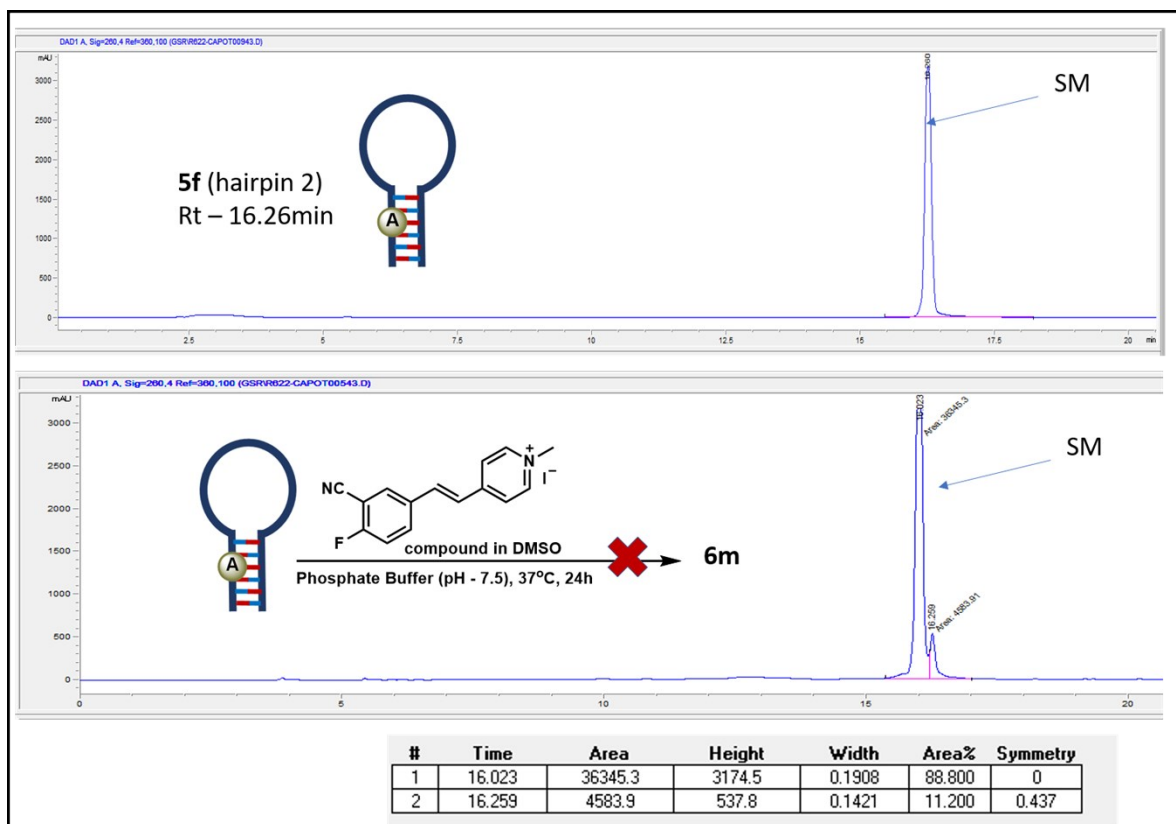

Figure S21: HPLC trace for hairpin stem **6m** (No reaction).

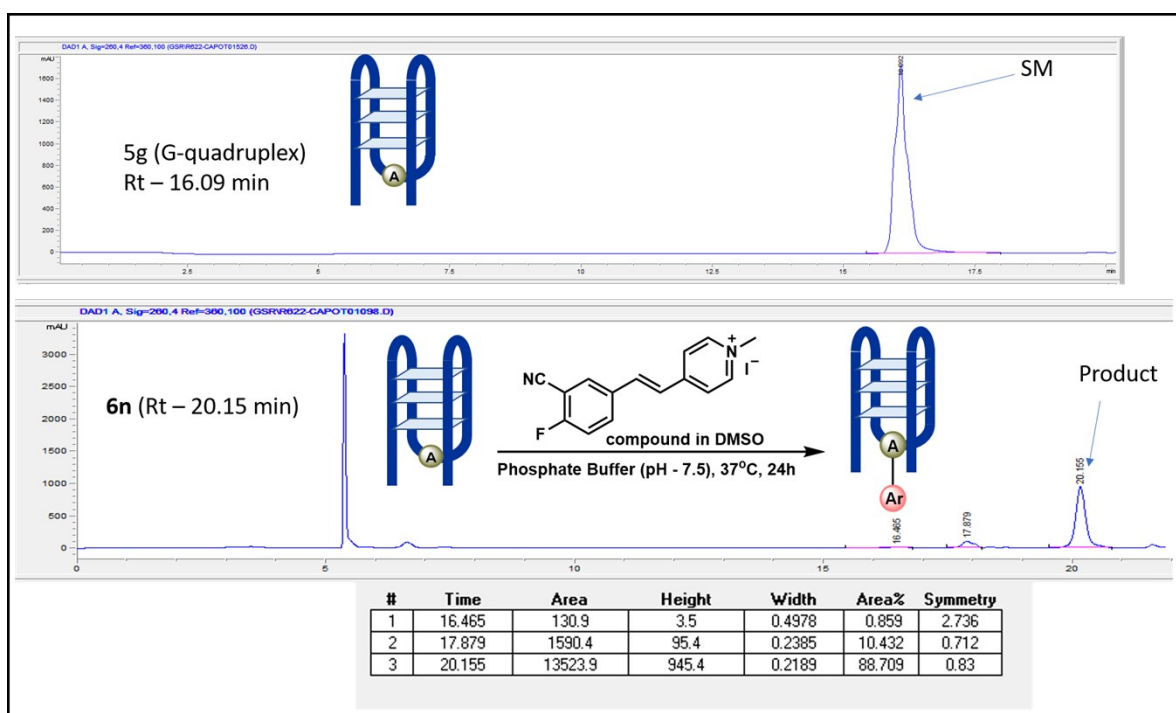

Figure S22: HPLC trace for G-quadruplex Loop **6n**.



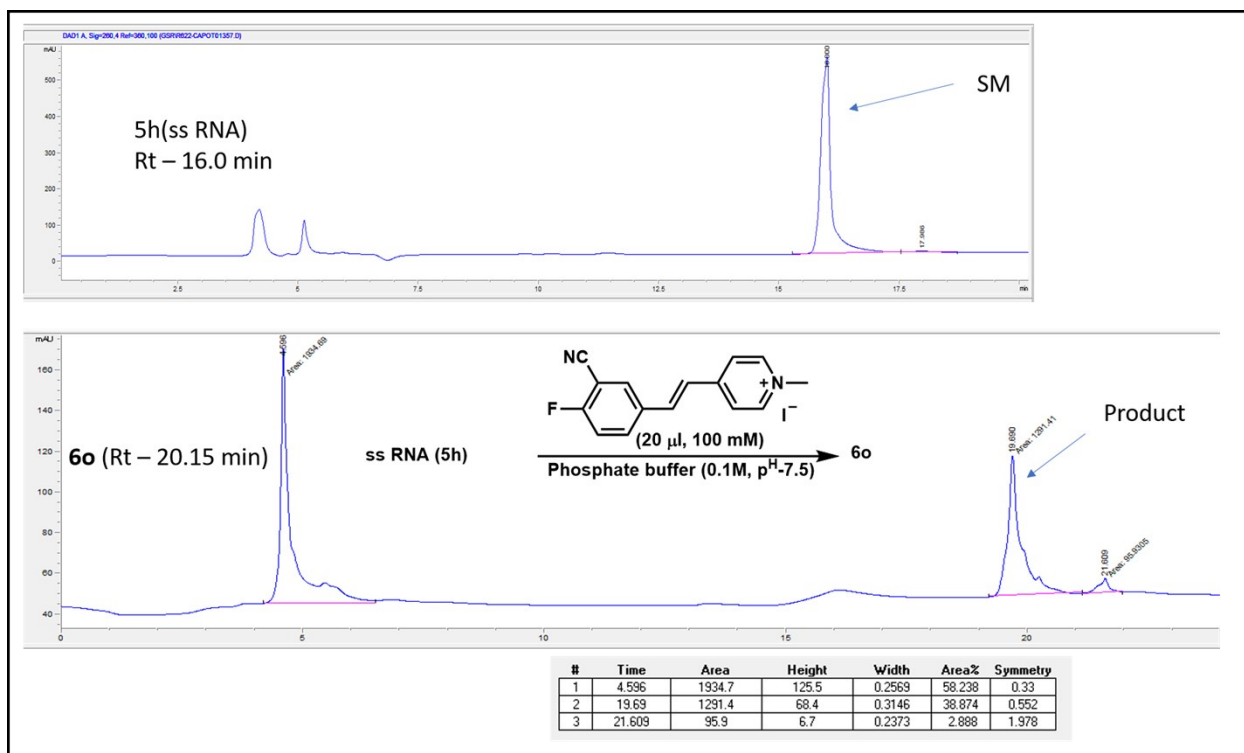

Figure S23: HPLC trace for ssRNA 6o.

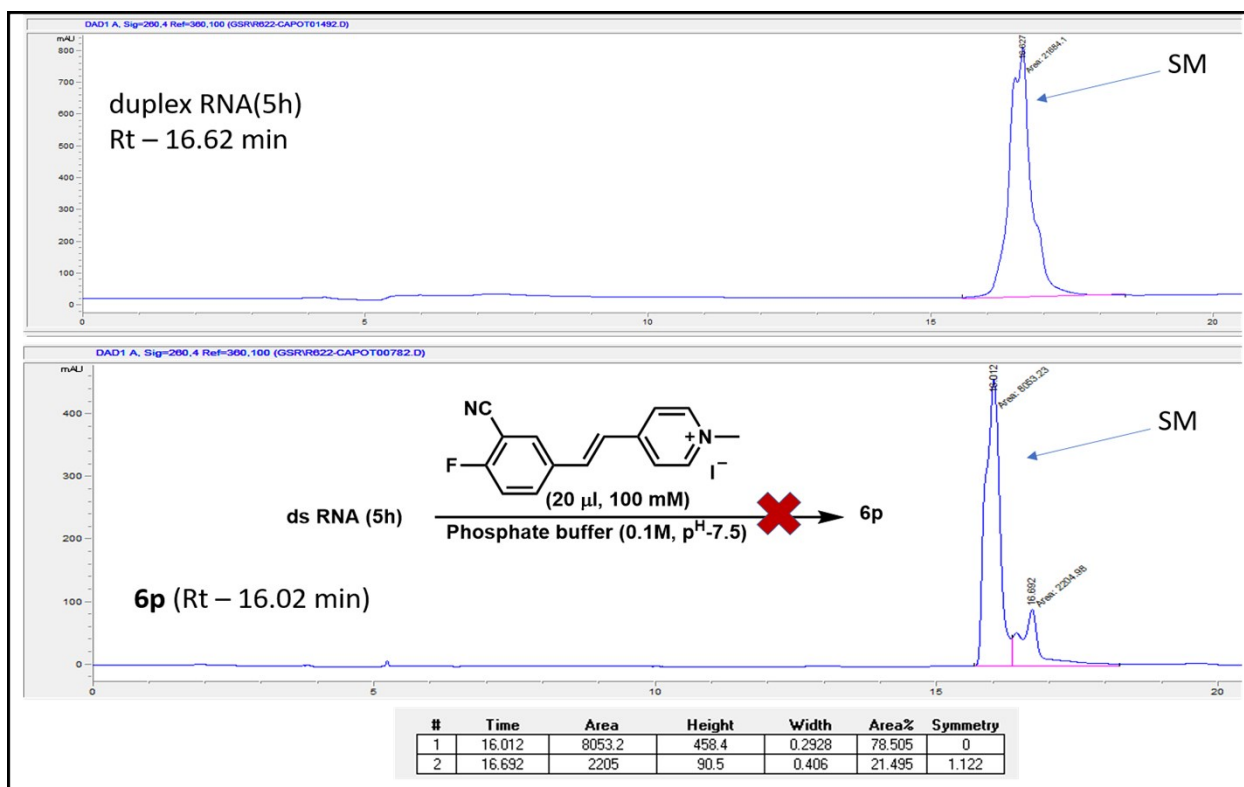

Figure S24: HPLC trace for duplex RNA 6p.

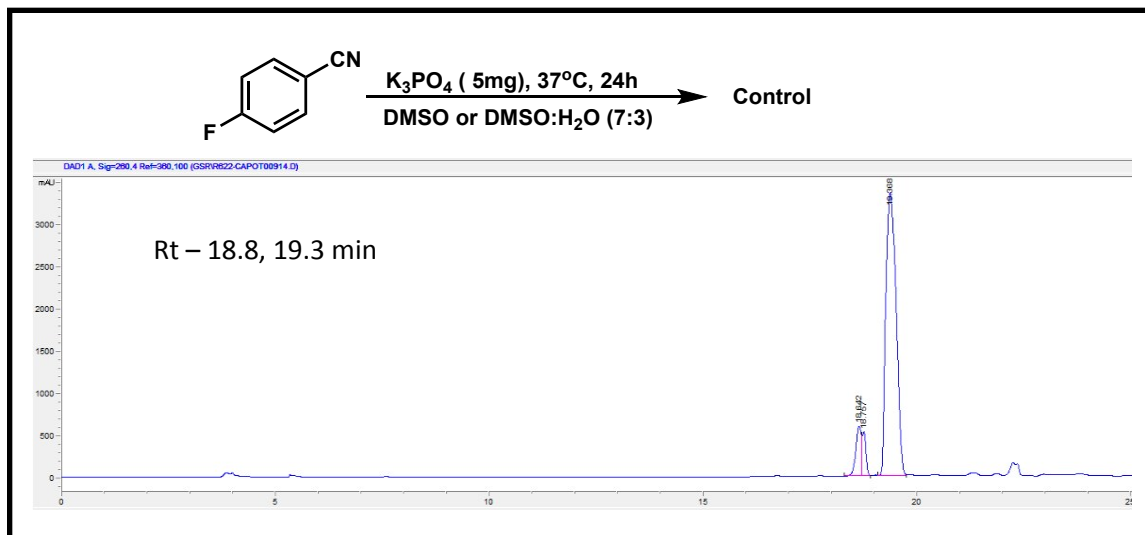

**Figure S25:** HPLC trace of control experiment to spot background signals.

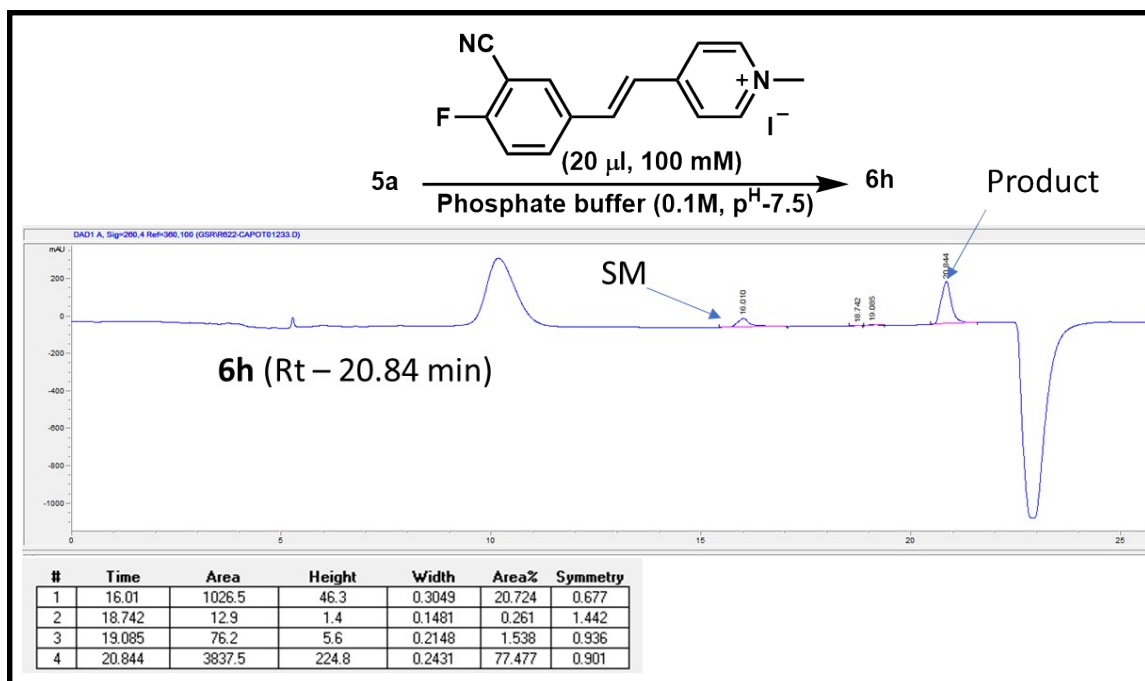

**Figure S26:** HPLC trace of the reaction of **5a** with **Z** (20  $\mu\text{L}$ , 100 mM) in phosphate buffer (200  $\mu\text{L}$ , 0.1 M, pH 7.5) to provide **6h** at 37  $^\circ\text{C}$  for 24 h.

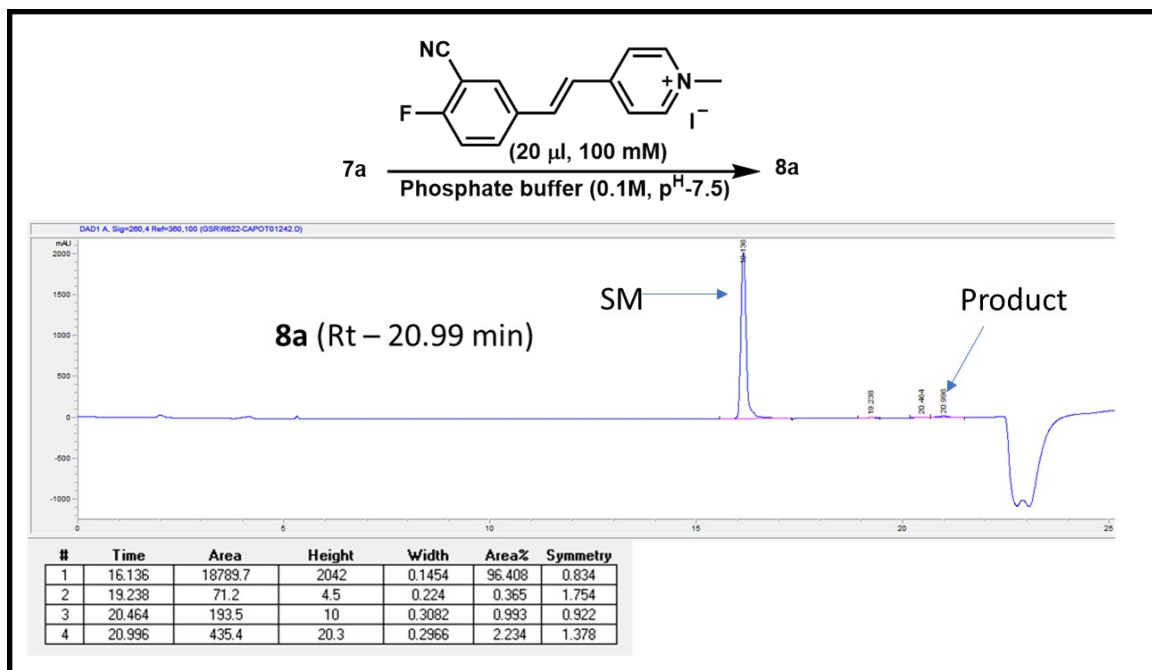

**Figure S27:** HPLC trace of the reaction of **7a** with **Z** (20  $\mu$ L, 100 mM) in phosphate buffer (200  $\mu$ L, 0.1 M, pH 7.5) at 37  $^{\circ}$ C for 24 h.

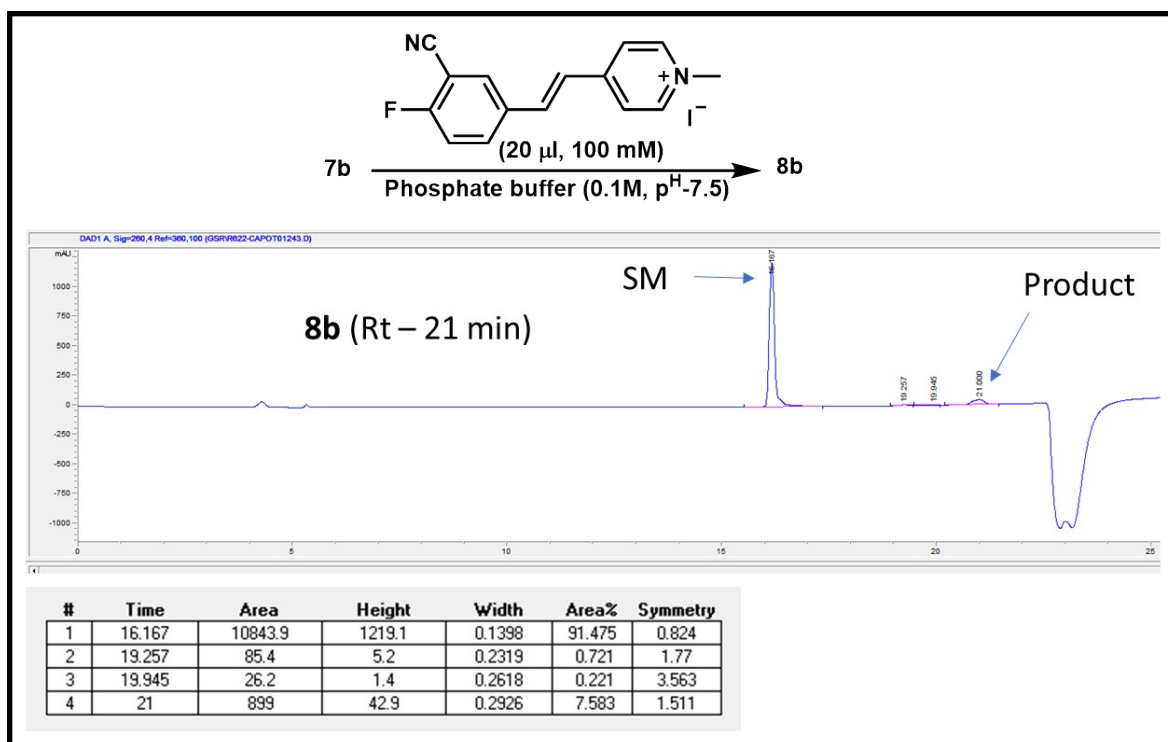

**Figure S28:** HPLC trace of the reaction of **7b** with **Z** (20  $\mu$ L, 100 mM) in phosphate buffer (200  $\mu$ L, 0.1 M, pH 7.5) at 37  $^{\circ}$ C for 24 h.

## 14. MALDI-TOF Mass Spectra of Arylated Oligonucleotides

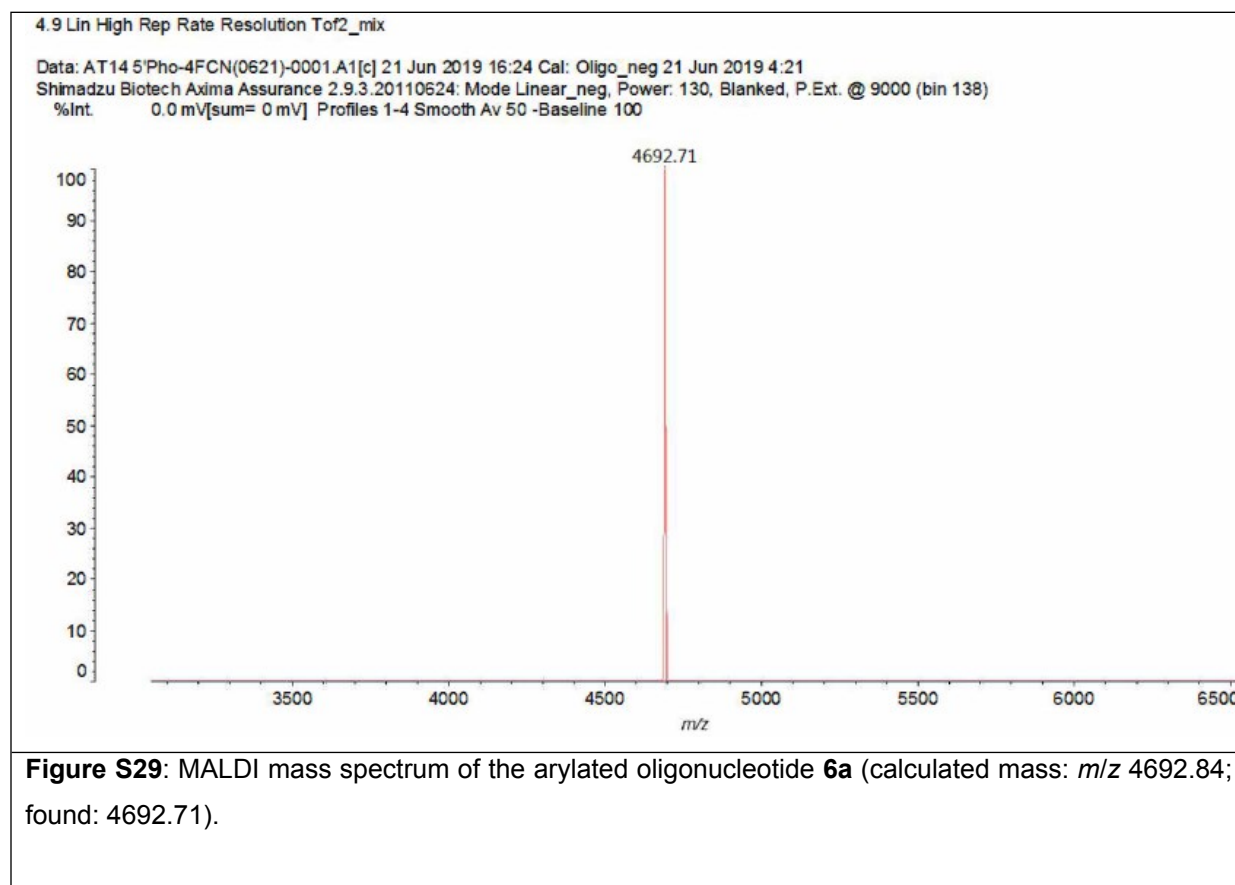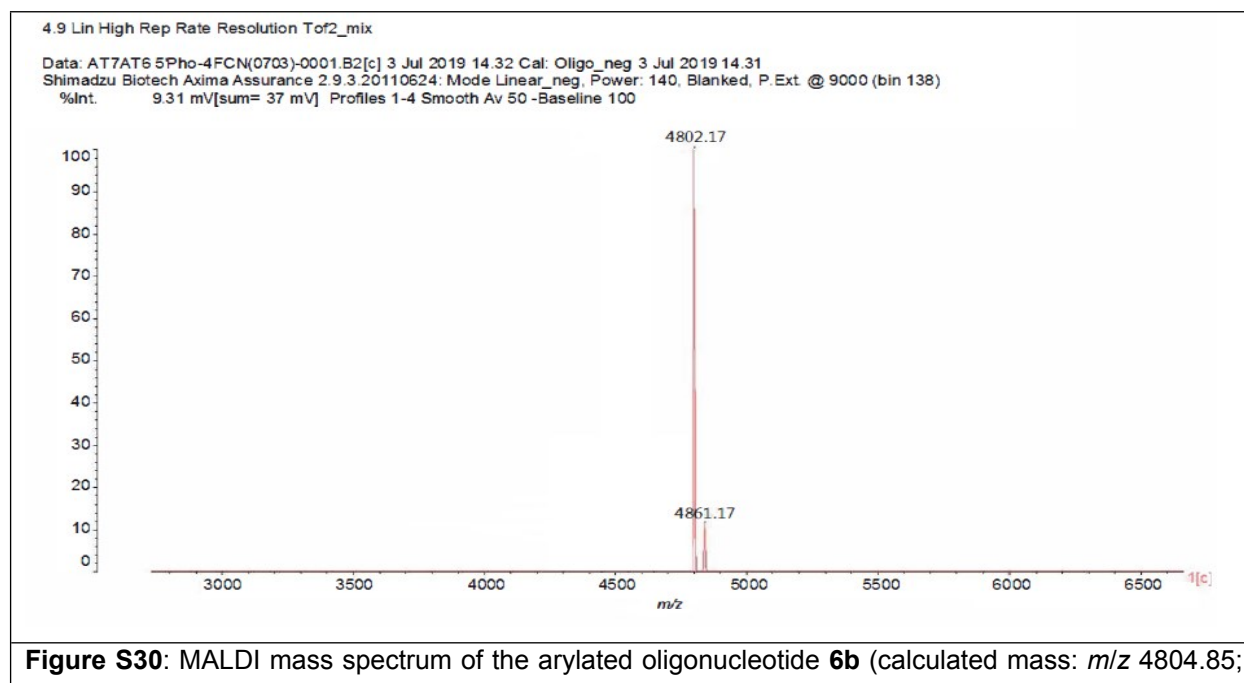

found: 4802.17, doubly substituted).

4.9 Lin High Rep Rate Resolution Tof2\_mix

Data: AT6AT6A 5'Pho-4FCN(0621)-0001.C3[c] 21 Jun 2019 16:32 Cal: Oligo\_neg 21 Jun 2019 4:21  
Shimadzu Biotech Axima Assurance 2.9.3.20110624: Mode Linear\_neg, Power: 130, Blanked, P.Ext. @ 9000 (bin 138)  
%Int. 4.0 mV[sum= 16 mV] Profiles 1-4 Smooth Av 50 -Baseline 100

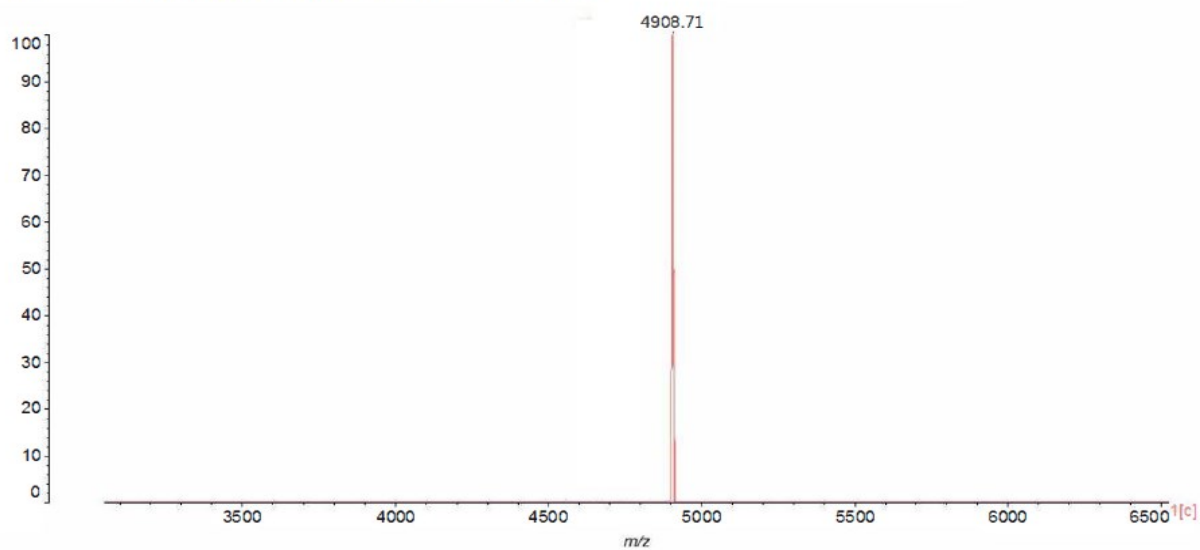

**Figure S31:** MALDI mass spectrum of the arylated oligonucleotide **6c** (calculated mass:  $m/z$  4916.86; found: 4908.71, triply substituted).

4.9 Lin High Rep Rate Resolution Tof2\_mix

Data: AT4 5'Pho-Py2FCN-0003.A2[c] 19 Jan 2020 22:24 Cal: Oligo\_neg 17 Jan 2020 1:38  
Shimadzu Biotech Axima Assurance 2.9.3.20110624; Mode Linear\_neg, Power: 149, Blanked, P.Ext. @ 9000 (bin 138)  
%Int. 0.0 mV[sum=0 mV] Profiles 1-4 Smooth Av 50 - Baseline 100

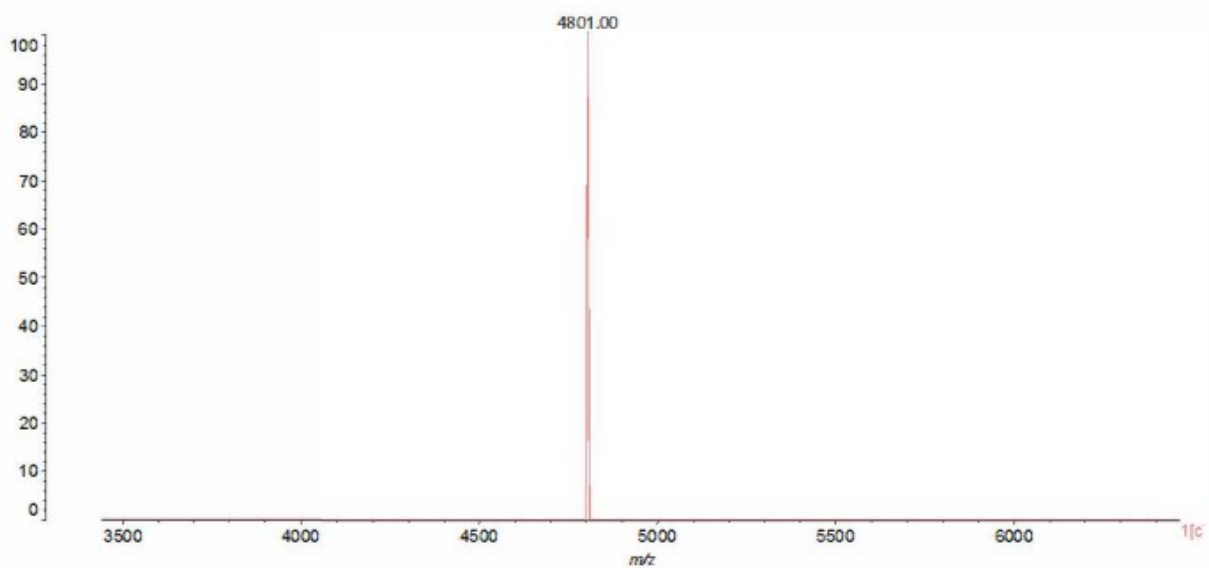

**Figure S32:** MALDI mass spectrum of the arylated oligonucleotide **6e** (calculated mass:  $m/z$  4796.08; found: 4801.00).

4.9 Lin High Rep Rate Resolution ToF2\_mix

Data: AT7AT6 5Pho-Py2FCN-0001.A3[c] 12 Jan 2020 22:18 Cal: Oligo\_neg 9 Jan 2020 9:15  
Shimadzu Biotech Axima Assurance 2.9.3.20110624: Mode Linear\_neg, Power: 147, Blanked, P.Ext. @ 9000 (bin 138)  
%Int. 2.1 mV[sum= 9 mV] Profiles 1-4 Smooth Av 50 -Baseline 100

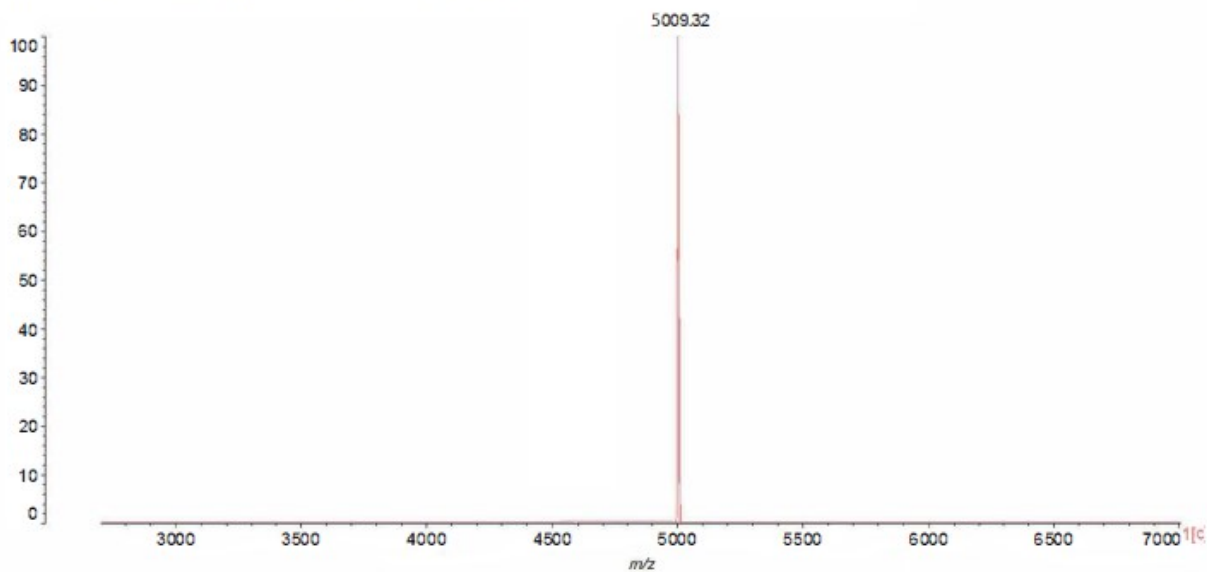

**Figure S33:** MALDI mass spectrum of the arylated oligonucleotide **6f** (calculated mass:  $m/z$  5010.48; found: 5009.32).

4.9 Lin High Rep Rate Resolution ToF2\_mix

Data: AT6AT6A 5Pho-Py2FCN-0001.A4[c] 12 Jan 2020 22:20 Cal: Oligo\_neg 9 Jan 2020 9:15  
Shimadzu Biotech Axima Assurance 2.9.3.20110624: Mode Linear\_neg, Power: 147, Blanked, P.Ext. @ 9000 (bin 138)  
%Int. 7.5 mV[sum= 30 mV] Profiles 1-4 Smooth Av 50 -Baseline 100

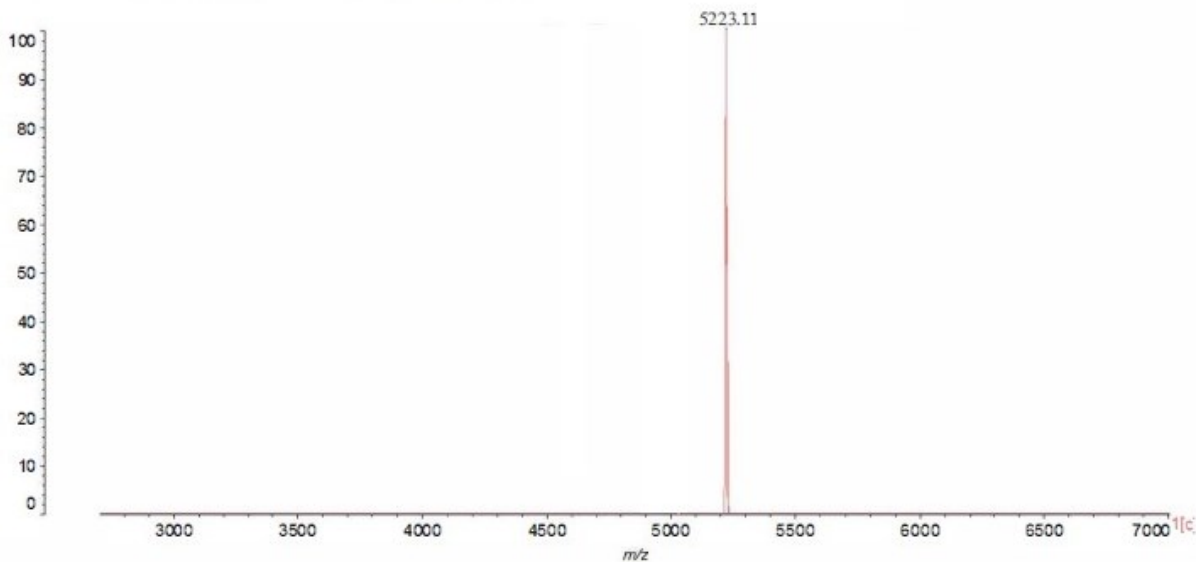



**Figure S34:** MALDI mass spectrum of the arylated oligonucleotide **6g** (calculated mass:  $m/z$  5226.58; found: 5223.11).

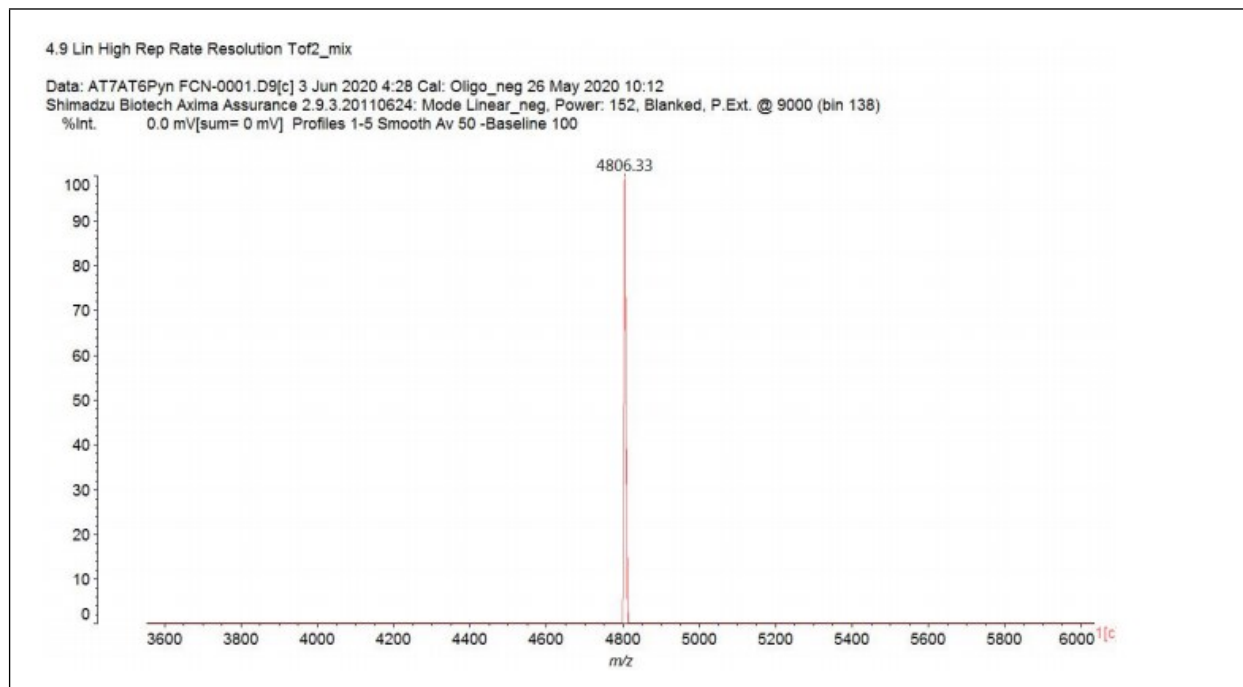

**Figure S35:** MALDI mass spectrum of the arylated oligonucleotide **6h** (calculated mass:  $m/z$  4810.83; found: 4806.33).

4.9 Lin High Rep Rate Resolution ToF2\_mix

Data: AT7AT6 5Pho-PyMe2FCN-0001.B3[c] 12 Jan 2020 22:48 Cal: Oligo\_neg 10 Jan 2020 9:15  
Shimadzu Biotech Axima Assurance 2.9.3.20110624: Mode Linear\_neg, Power: 147, Blanked, P.Ext. @ 9000 (bin 138)  
%Int. 2.1 mV[sum= 9 mV] Profiles 1-4 Smooth Av 50 -Baseline 100

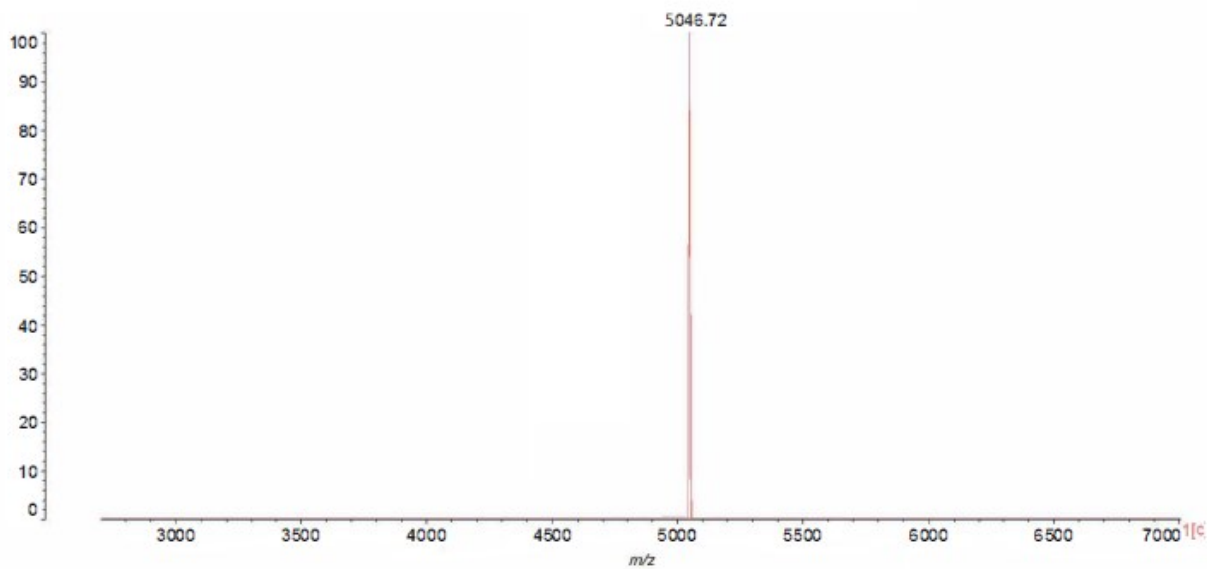

**Figure S36:** MALDI mass spectrum of the arylated oligonucleotide **6i** (calculated mass:  $m/z$  5041.41; found: 5046.72).

4.9 Lin High Rep Rate Resolution ToF2\_mix

Data: AT6AT6A 5Pho-PyMe2FCN-0001.A2[c] 19 Jan 2020 22:24 Cal: Oligo\_neg 17 Jan 2020 1:38  
Shimadzu Biotech Axima Assurance 2.9.3.20110624: Mode Linear\_neg, Power: 147, Blanked, P.Ext. @ 9000 (bin 138)  
%Int. 2.1 mV[sum= 9 mV] Profiles 1-4 Smooth Av 50 -Baseline 100

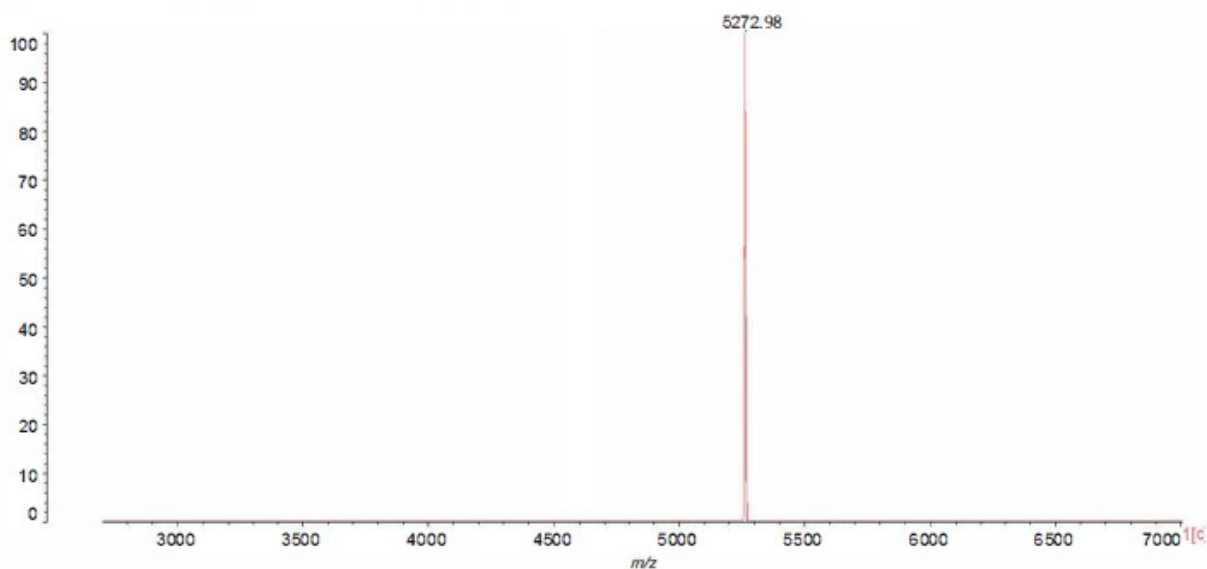

**Figure S37:** MALDI mass spectrum of the arylated oligonucleotide **6j** (calculated mass:  $m/z$  5271.70; found: 5272.98).

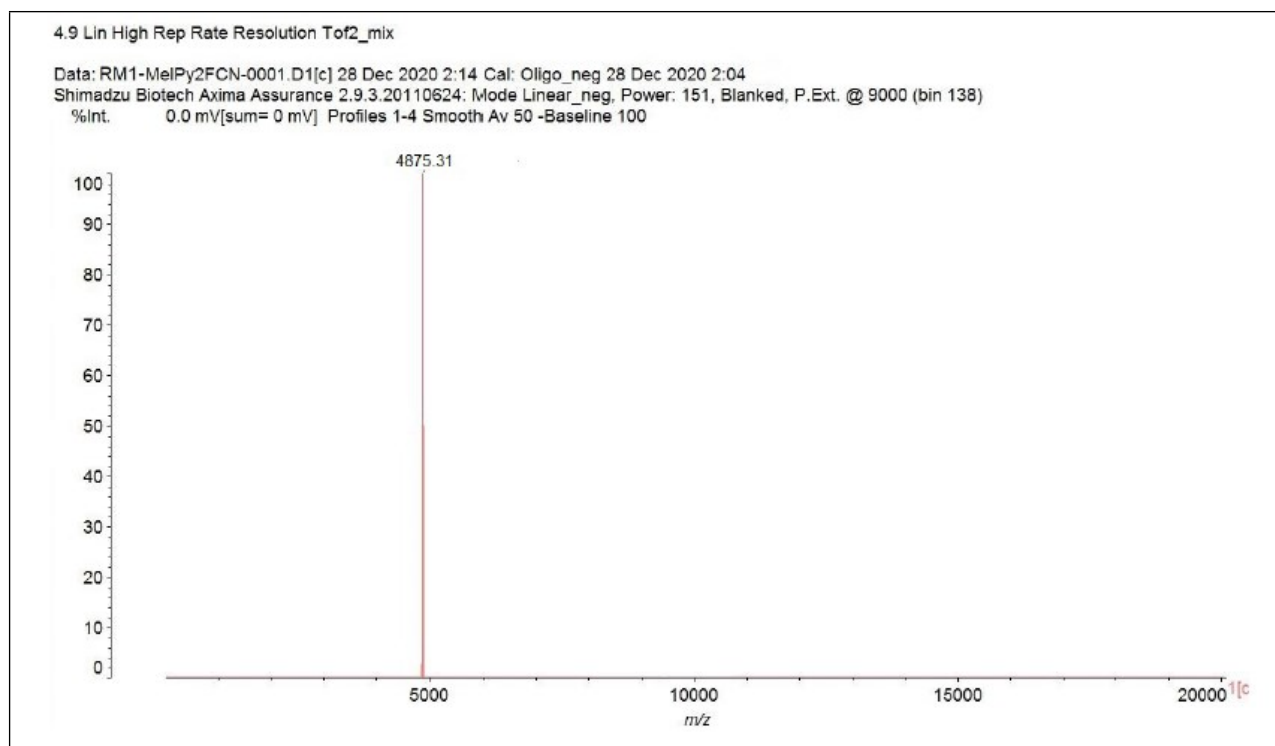

**Figure S38:** MALDI mass spectrum of the arylated oligonucleotide **6k** (calculated mass:  $m/z$  4874.44; found: 4875.31).

4.9 Lin High Rep Rate Resolution Tof2\_mix

Data: HP1-0001.D6[c] 4 Mar 2021 5:15 Cal: Oligo\_neg 3 Mar 2021 2:02  
Shimadzu Biotech Axima Assurance 2.9.3.20110624: Mode Linear\_neg, Power: 154, Blanked, P.Ext. @ 9000 (bin 138)  
%Int. 0.1 mV[sum= 0 mV] Profiles 1-4 Smooth Av 50 -Baseline 100

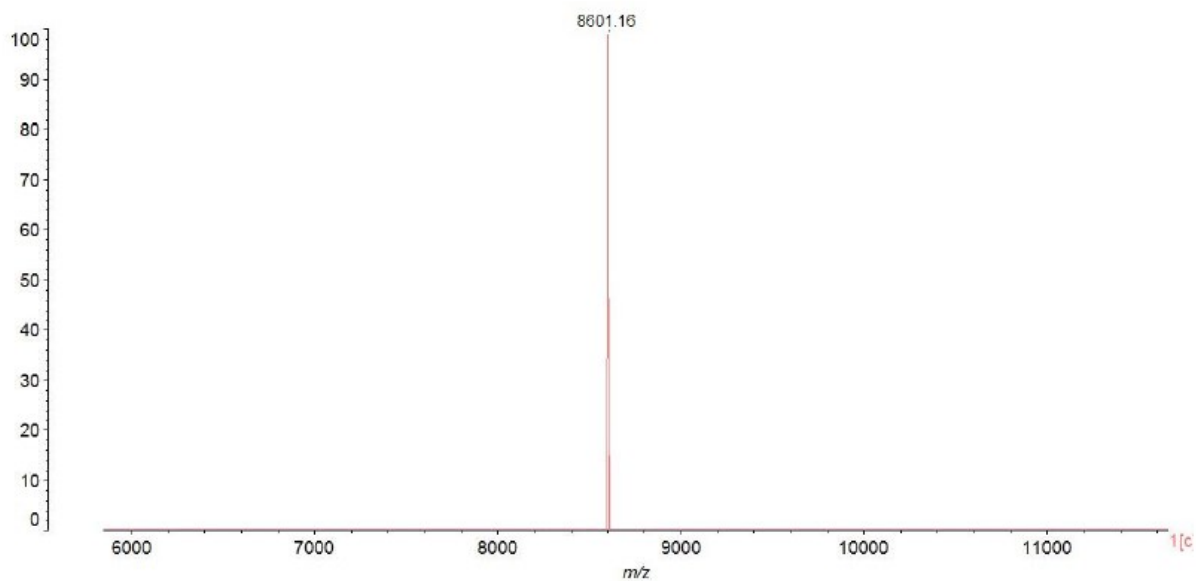

**Figure S39:** MALDI mass spectrum of the arylated oligonucleotide **6I** (calculated mass:  $m/z$  8595.56; found: 8601.16).

4.9 Lin High Rep Rate Resolution Tof2\_mix

Data: G4s-0001.D3[c] 4 Mar 2021 5:14 Cal: Oligo\_neg 3 Mar 2021 2:02  
Shimadzu Biotech Axima Assurance 2.9.3.20110624: Mode Linear\_neg, Power: 161, Blanked, P.Ext. @ 9000 (bin 138)  
%Int. 0.0 mV[sum= 0 mV] Profiles 1-4 Smooth Av 50 -Baseline 100

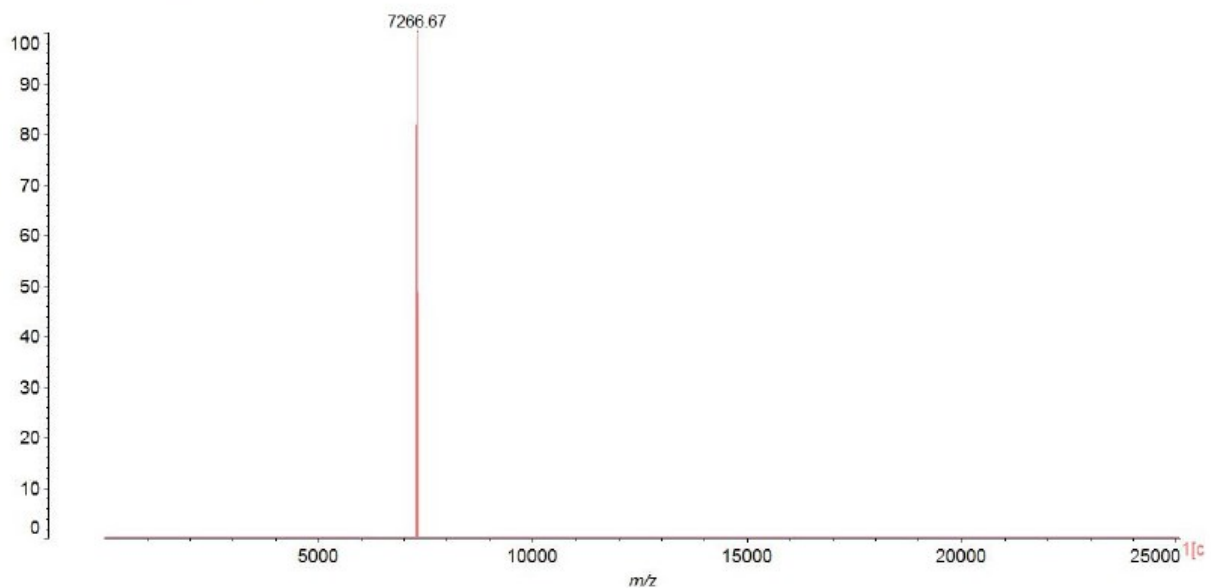

**Figure S40:** MALDI mass spectrum of the arylated oligonucleotide **6n** (calculated mass:  $m/z$  7264.3; found: 7266.67).

4.9 Lin High Rep Rate Resolution Tof2\_mix

Data: ssRNA-0001.D10[c] 4 Mar 2021 5:16 Cal: Oligo\_neg 3 Mar 2021 2:02

Shimadzu Biotech Axima Assurance 2.9.3.20110624: Mode Linear\_neg, Power: 141, Blanked, P.Ext. @ 9000 (bin 138)

%Int. 4.6 mV[sum= 19 mV] Profiles 1-4 Smooth Av 50 -Baseline 100

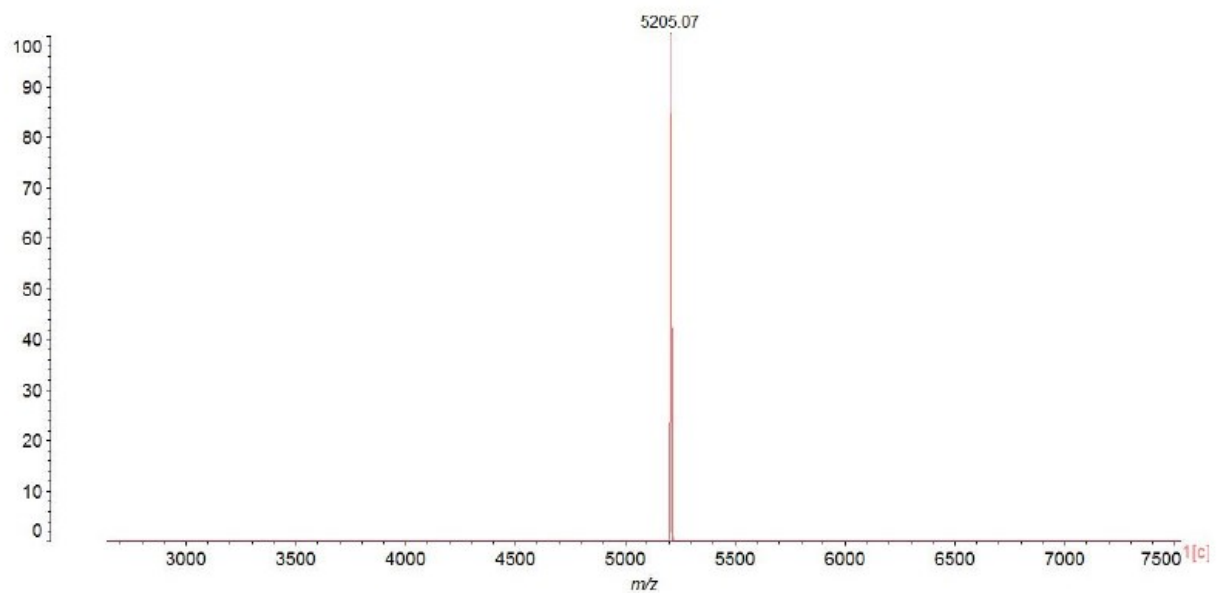

**Figure S41:** MALDI mass spectrum of the arylated oligonucleotide **6o** (calculated mass:  $m/z$  5199.67; found: 5205.07).

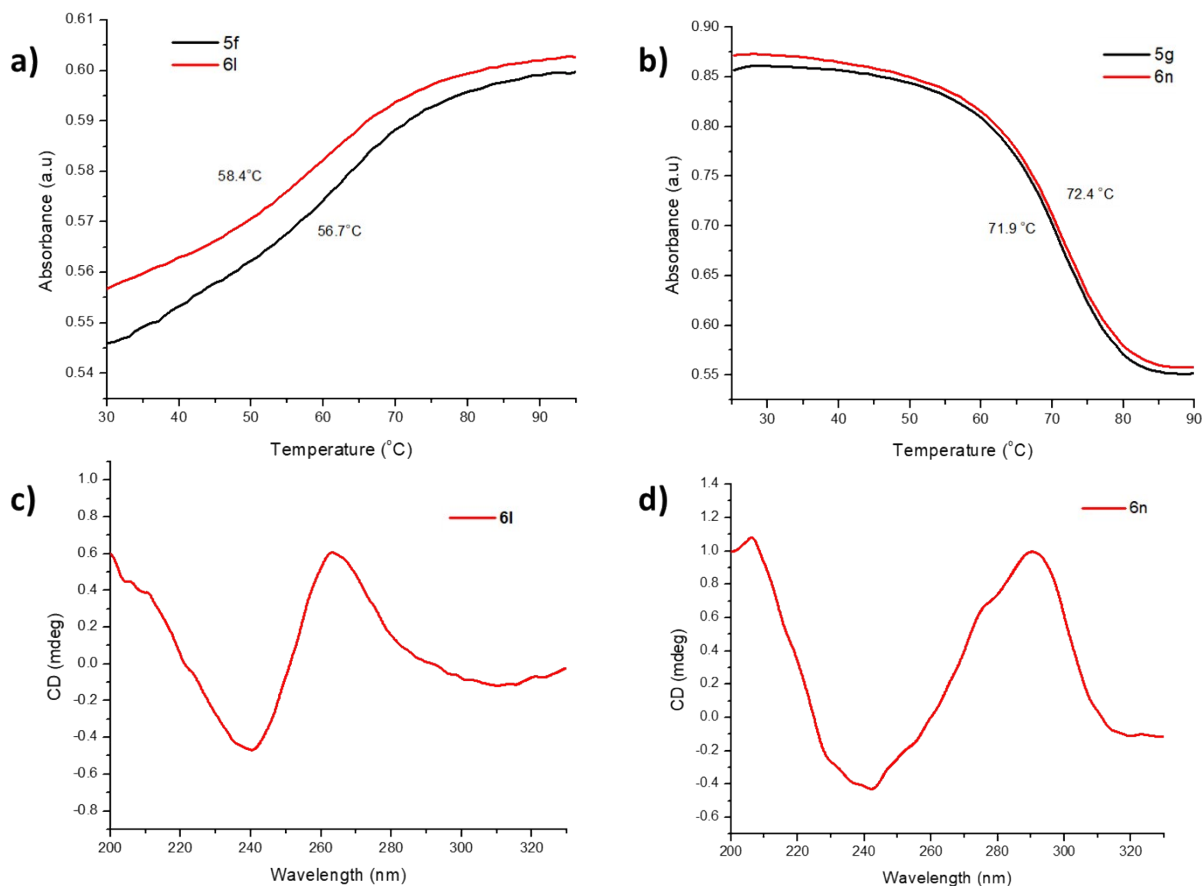

**Figure S42:** (a, b) Melting point of **6l** (after arylation) and **6n** (after arylation) in corresponds to their starting oligonucleotides **5f**(before arylation) and **5g** (before arylation) ; (c, d) CD spectra of arylated Haripin 1 **6l** and G-quadruplex **6n** with range of 200–300 nm (2  $\mu$ M each).

## 16. Photophysical Properties of Arylated Dimethoxytrityldeoxyadenosine Products

$$A = \varepsilon cl$$

- $A$  is the absorbance of the compounds measured at the wavelength maximum ( $\lambda_{\max}$ ).
- $\varepsilon$  is the extinction coefficient [ $M^{-1} \text{ cm}^{-1}$ ].
- $c$  is the concentration [ $M$ ].
- $l$  is the path length of the cuvette [ $\text{cm}$ ]



| Compound  | Absorbance at $\lambda_{\max}$ | Concentration (M)   | Path length of cuvette (cm) | $\lambda_{\max}$ (nm) | Extinction coefficient ( $\epsilon$ ) ( $M^{-1} \text{ cm}^{-1}$ ) |
|-----------|--------------------------------|---------------------|-----------------------------|-----------------------|--------------------------------------------------------------------|
| <b>2a</b> | 0.0470                         | $10 \times 10^{-6}$ | 1                           | 320                   | 4700                                                               |
| <b>2c</b> | 0.0077                         | $10 \times 10^{-6}$ | 1                           | 321                   | 770                                                                |
| <b>2d</b> | 0.0048                         | $10 \times 10^{-6}$ | 1                           | 323                   | 480                                                                |
| <b>2e</b> | 0.0395                         | $10 \times 10^{-6}$ | 1                           | 300                   | 3950                                                               |
| <b>2f</b> | 0.0243                         | $10 \times 10^{-6}$ | 1                           | 284                   | 2430                                                               |
| <b>2i</b> | 0.04723                        | $10 \times 10^{-6}$ | 1                           | 353                   | 4723                                                               |
| <b>2j</b> | 0.04003                        | $10 \times 10^{-6}$ | 1                           | 450                   | 4003                                                               |

### Calculated Quantum Yields of Fluorophore Compounds in DMSO

$$Q = Q_R \left( \frac{Grad}{Grad_R} \right) \left( \frac{n^2}{n_R^2} \right)$$

- Q is the fluorescence quantum yield of the compound.
- $Q_R$  is the fluorescence quantum yield of the reference compound.
- *Grad* is the gradient obtained from the plot of the integrated fluorescence intensity and absorption.
- *n* the refractive index of the solvent (DMSO).
- the subscript R denotes the reference compound.

Using the literature value:

$Q_R$  (acetone) = 0.99

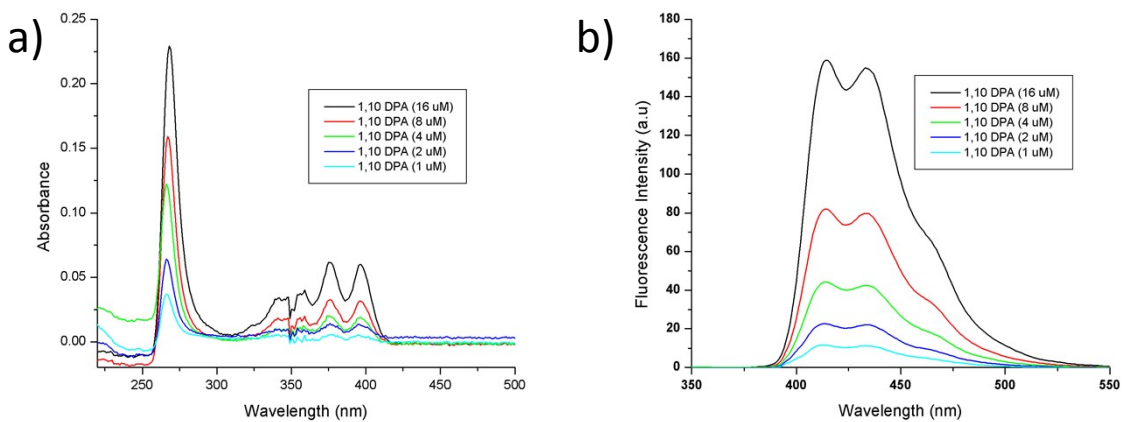

**Figure S43:** UV-Vis and fluorescence spectra of 1,10-diphenylanthracene.

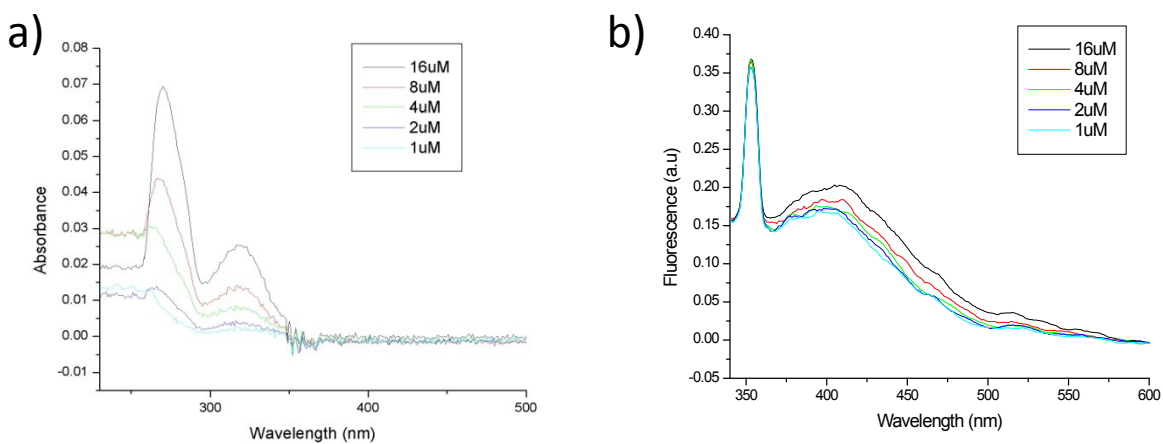

**Figure S44:** UV-Vis and fluorescence spectra of 2a.

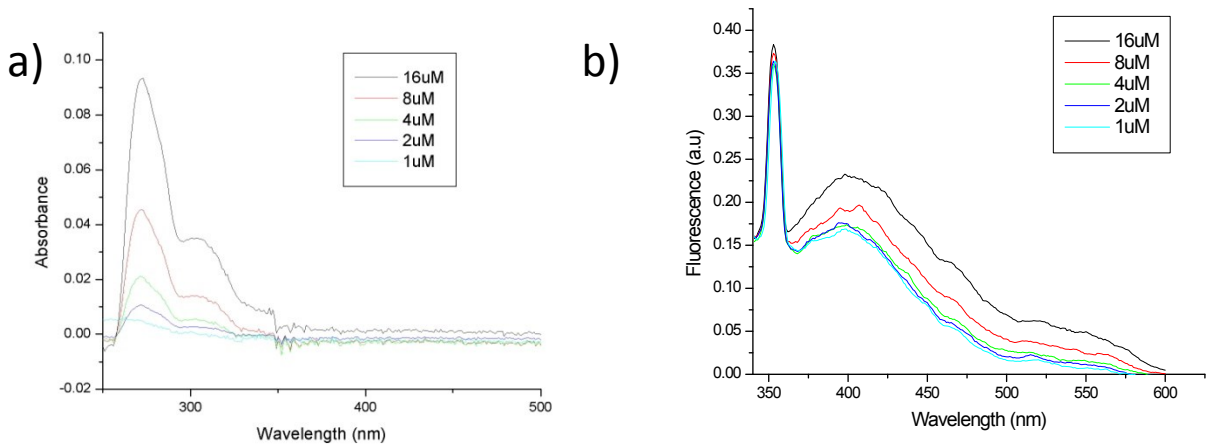

Figure S45: UV-Vis and fluorescence spectra of 2c.

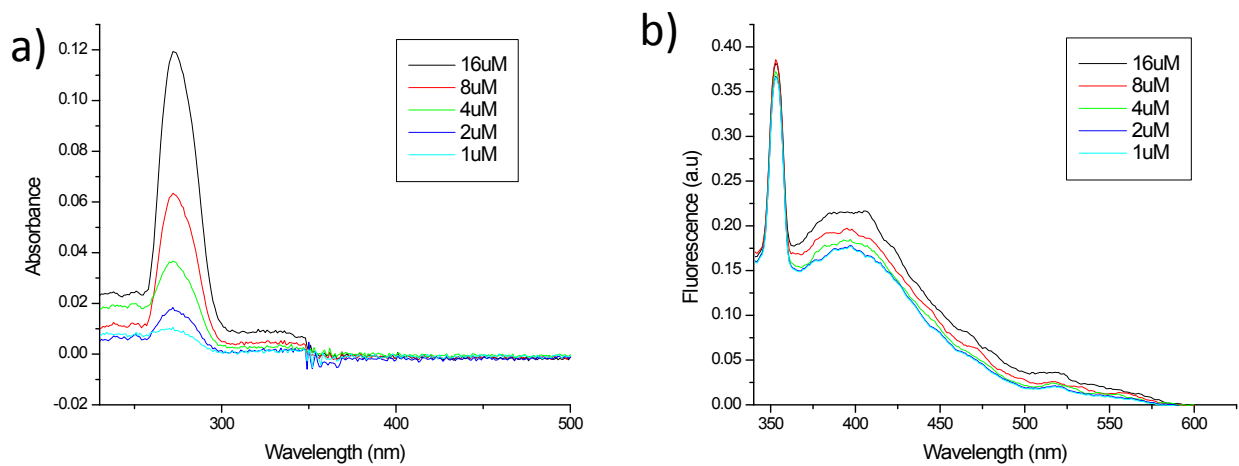

Figure S46: UV-Vis and fluorescence spectra of 2d.

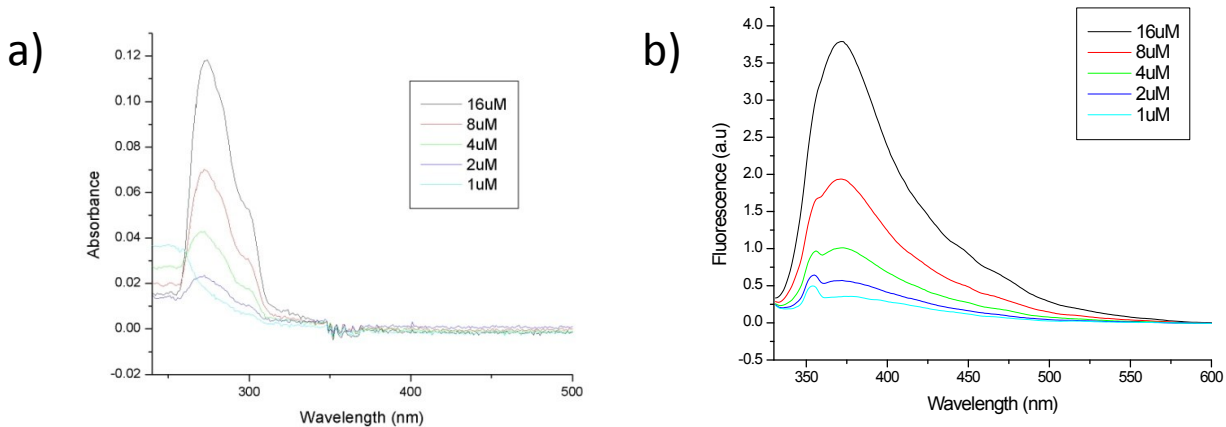

Figure S47: UV-Vis and fluorescence spectra of 2e.

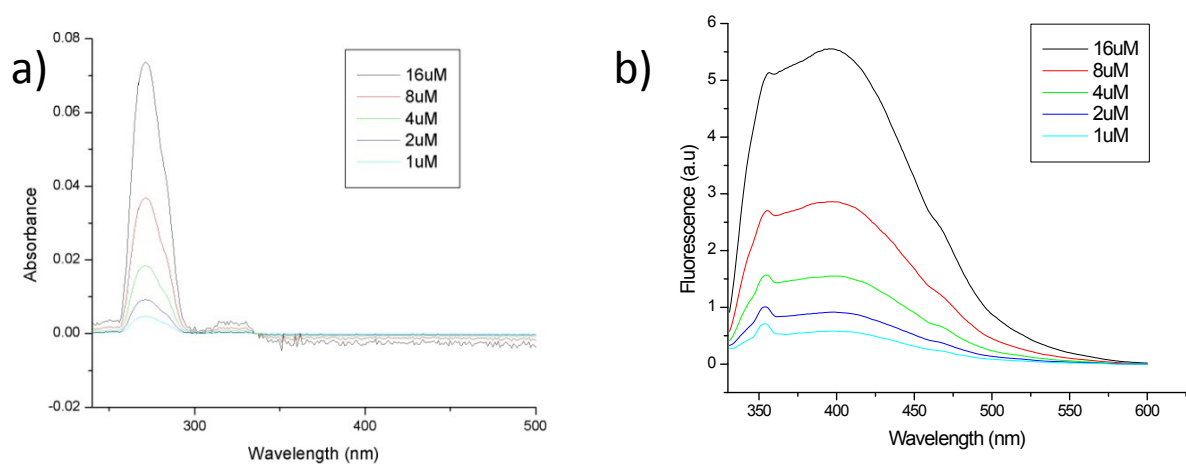

Figure S48: UV-Vis and fluorescence spectra of 2f.

|    | A    | B              | C           | D              | E           | F             | G           | H                | I           | J                | K           | L             | M           |
|----|------|----------------|-------------|----------------|-------------|---------------|-------------|------------------|-------------|------------------|-------------|---------------|-------------|
| 1  | Conc | 9,10 DPA (UV)  | Area of Flr | dADMT2FCHO(UV) | Area of Flr | dADMT2FCN(UV) | Area of Flr | dADMT2FCOCH3(UV) | Area of Flr | dADMT4FCOCH3(UV) | Area of Flr | dADMT4FCN(UV) | Area of Flr |
| 2  | 1uM  | 0.003954114    | 0.0655703   | 0.001418769    | 0.0020101   | 0.006727388   | 0.0036177   | 0.000427943      | 0.0020317   | 0.000374628      | 0.0021815   | 0.002439748   | 0.00724     |
| 3  | 2uM  | 0.012541457    | 0.1319254   | 0.003403353    | 0.0020809   | 0.010366018   | 0.0051788   | 0.000831559      | 0.0021239   | 0.002198381      | 0.0022084   | 0.004879497   | 0.011329    |
| 4  | 4uM  | 0.018788697    | 0.2601691   | 0.007288649    | 0.0021401   | 0.017491985   | 0.0084667   | 0.001663118      | 0.0022055   | 0.002087015      | 0.0023      | 0.009758993   | 0.019218    |
| 5  | 8uM  | 0.030979982    | 0.4815824   | 0.013044128    | 0.0022834   | 0.029677397   | 0.0153337   | 0.006928054      | 0.002574    | 0.004611834      | 0.0024755   | 0.019517986   | 0.035124    |
| 6  | 16uM | 0.05972271     | 0.9320033   | 0.025298245    | 0.0025968   | 0.052261405   | 0.0292328   | 0.021789201      | 0.0032866   | 0.009384462      | 0.0027429   | 0.039035972   | 0.068064    |
| 7  |      |                |             |                |             |               |             |                  |             |                  |             |               |             |
| 8  |      | Slope          | 16.098662   |                | 0.0241749   |               | 0.5667444   |                  | 0.0564396   |                  | 0.0651603   |               | 1.660292    |
| 9  |      | Intercept      | -0.0313942  |                | 0.0019783   |               | -0.0008419  |                  | 0.0020872   |                  | 0.0021385   |               | 0.003081    |
| 10 |      |                |             |                |             |               |             |                  |             |                  |             |               |             |
| 11 |      | Y              | 16.06727    |                | 0.02615     |               | 0.5659      |                  | 0.05852     |                  | 0.06729     |               | 1.6633      |
| 12 |      | Q.Y ( $\phi$ ) |             |                | 0.0016      |               | 0.034       |                  | 0.0036      |                  | 0.004       |               | 0.102       |
| 13 |      |                |             |                |             |               |             |                  |             |                  |             |               |             |

Figure S49: Quantum yield calculations.

# 17. <sup>1</sup>H and <sup>13</sup>C NMR Spectra of All DMTdA Fluoroarylation Products

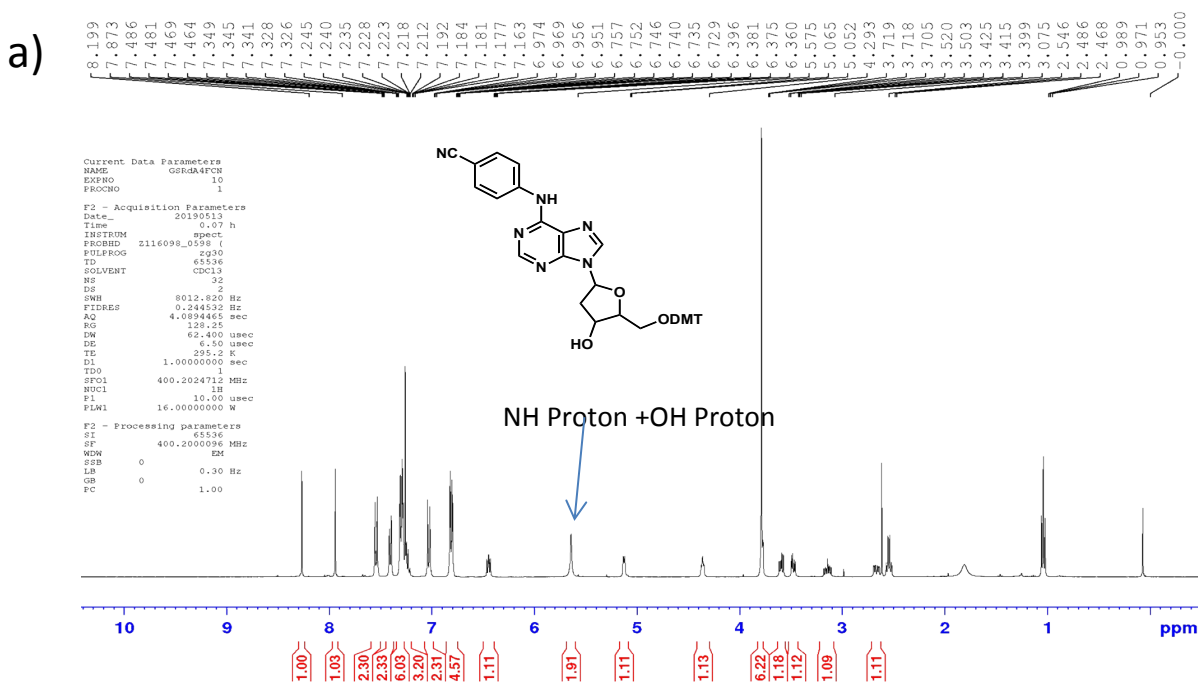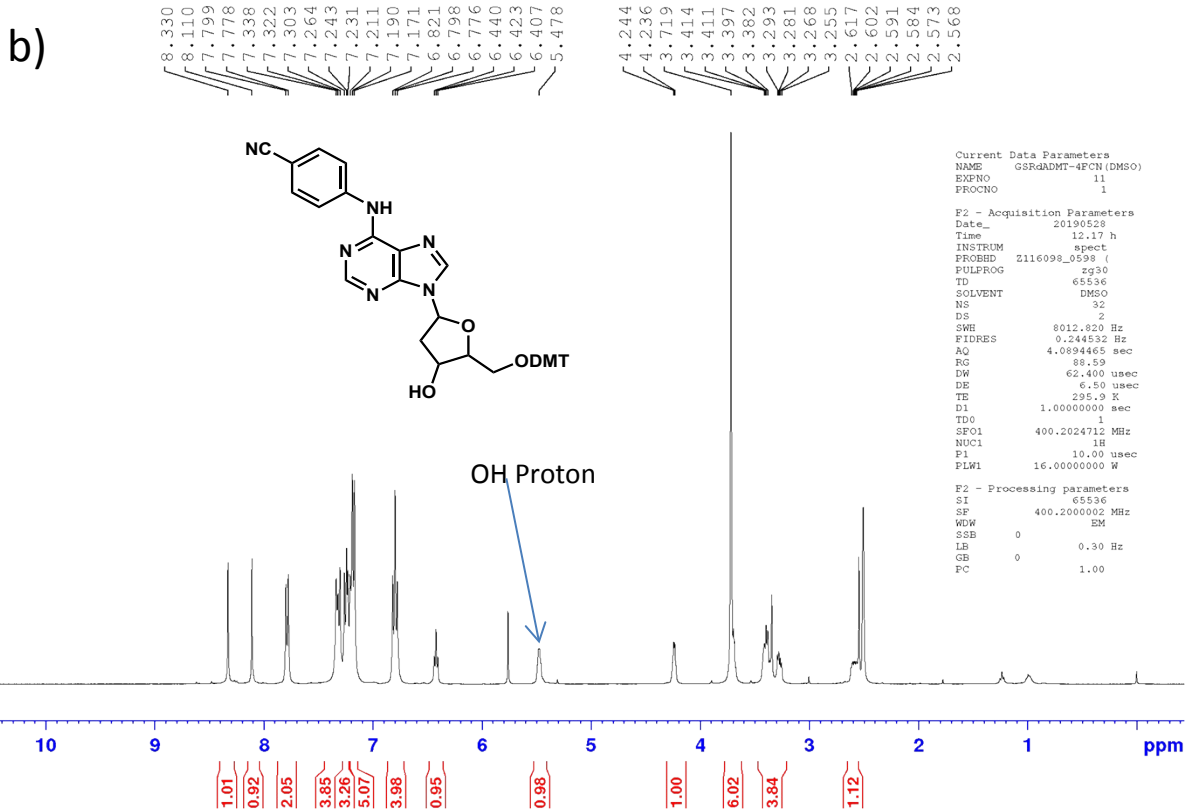

**Figure S49:**  $^1\text{H}$  NMR spectra of **2f** in (a)  $\text{CDCl}_3$  and (b)  $\text{DMSO}-d_6$ , recorded to determine whether the OH group of the sugar unit had been arylated or whether the arylation had occurred only at the  $N^6$  position of dimethoxytrityldeoxyadenosine.

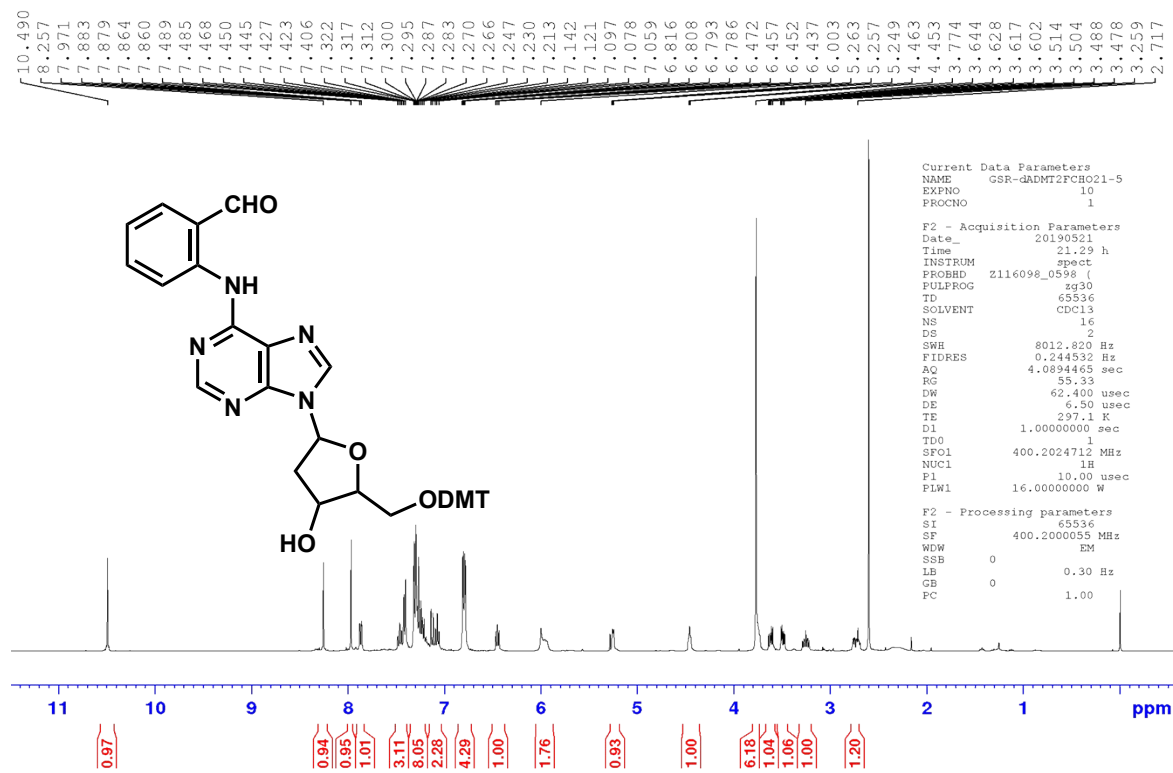

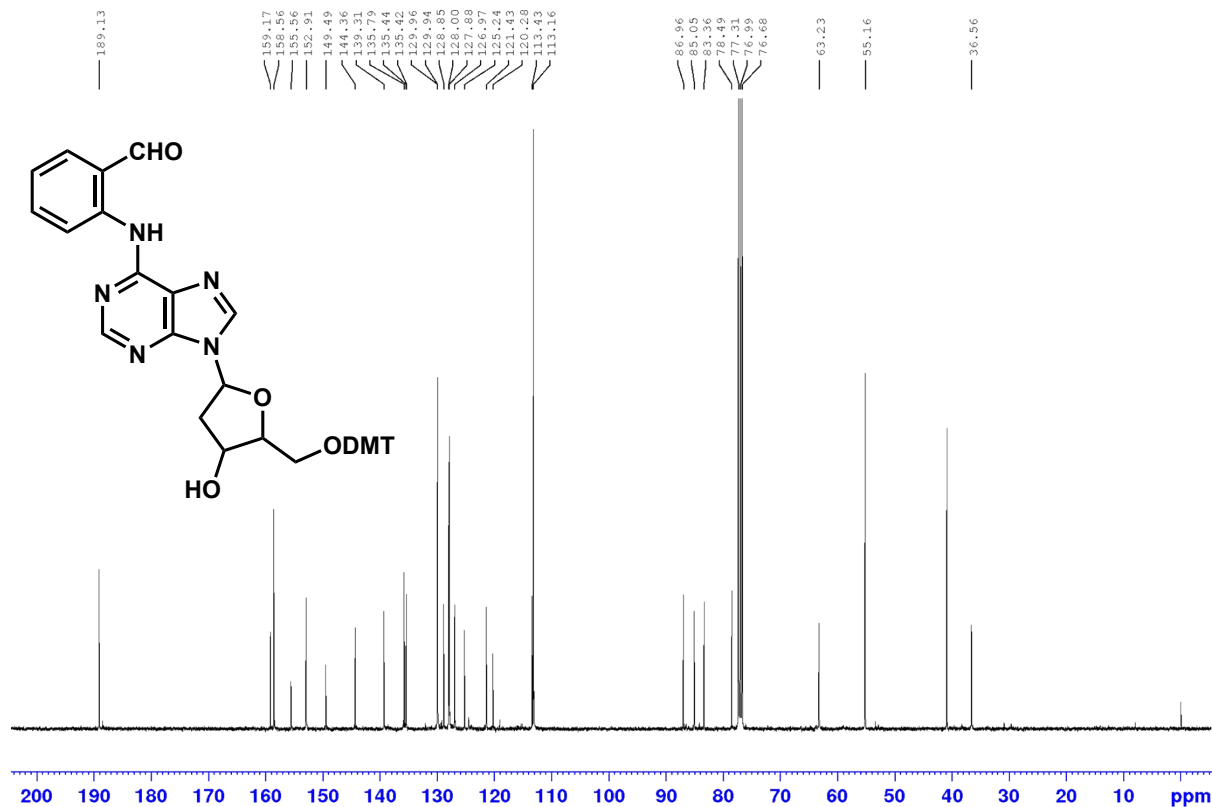

Figure S50: <sup>1</sup>H and <sup>13</sup>C NMR spectra of 2a in CHCl<sub>3</sub>.

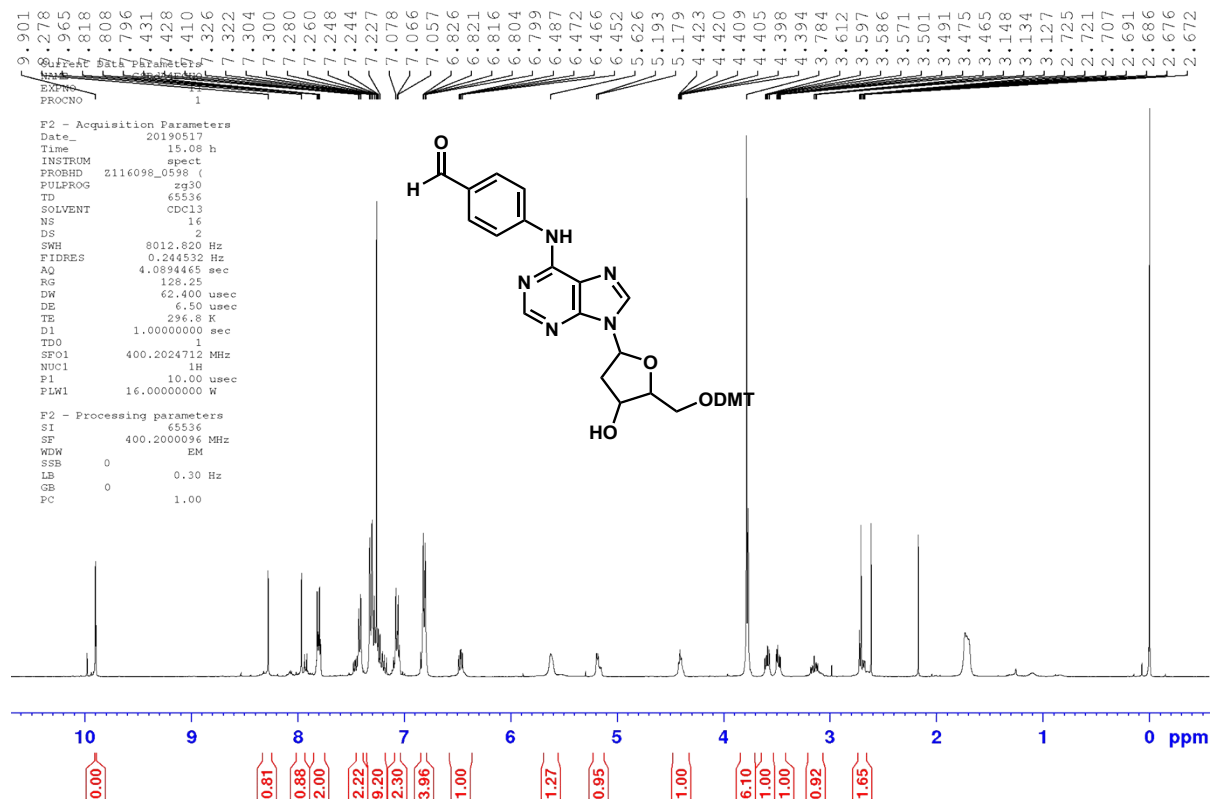

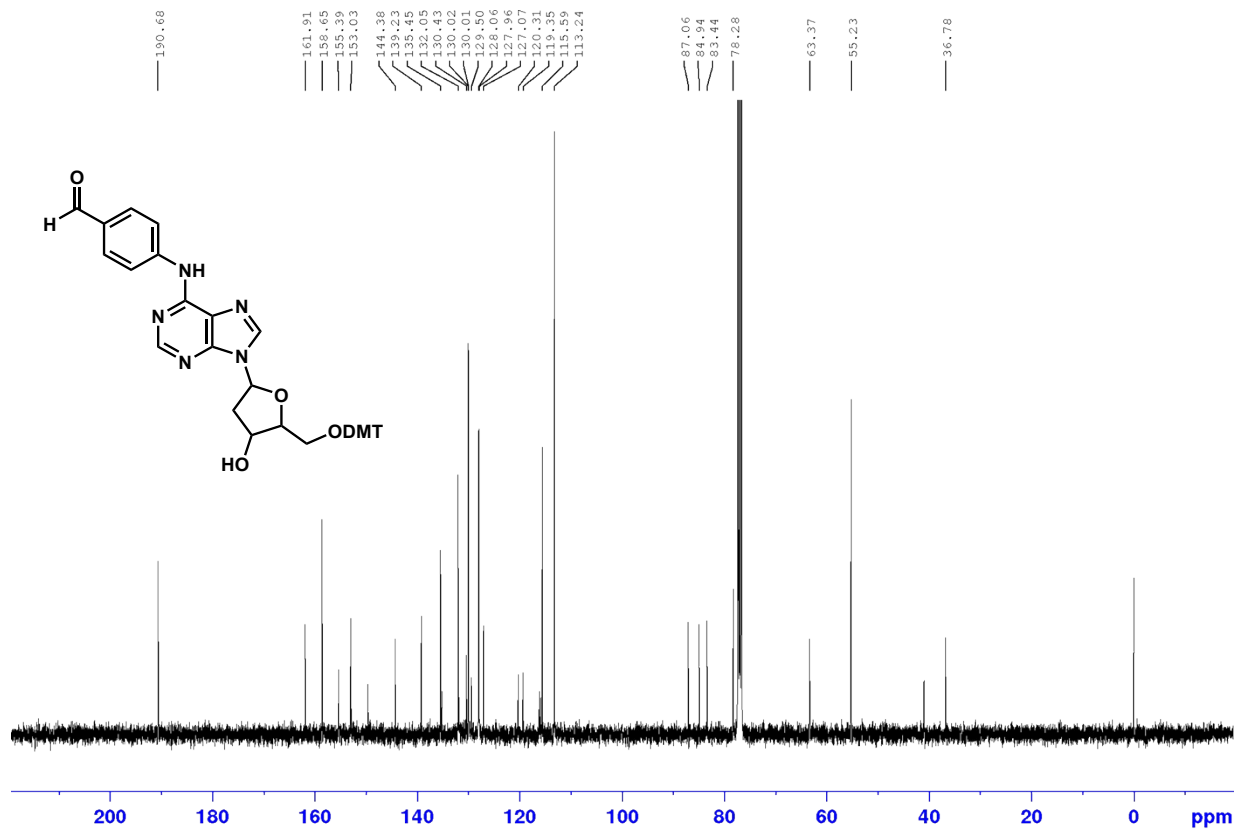

Figure S51: <sup>1</sup>H and <sup>13</sup>C NMR spectra of **2b** in CHCl<sub>3</sub>.



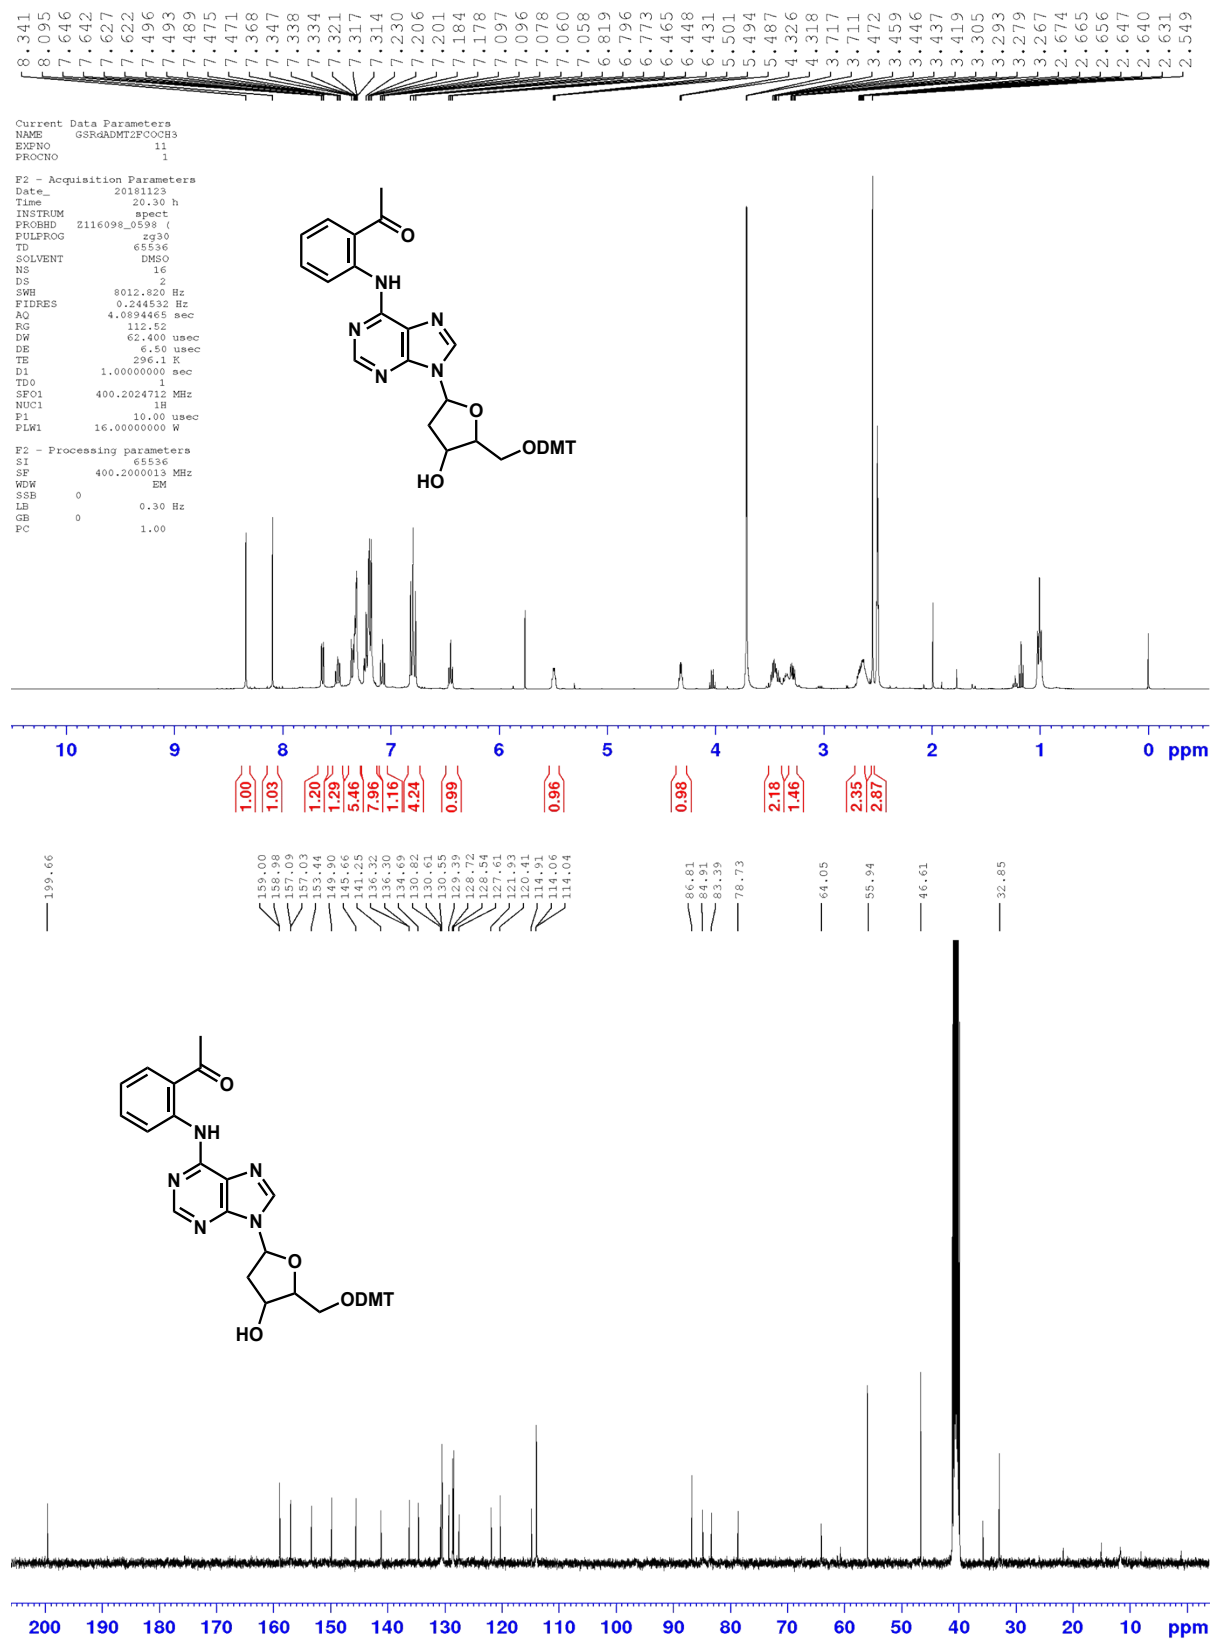

Figure S52:  $^1\text{H}$  and  $^{13}\text{C}$  NMR spectra of **2c** in  $\text{DMSO-}d_6$ .

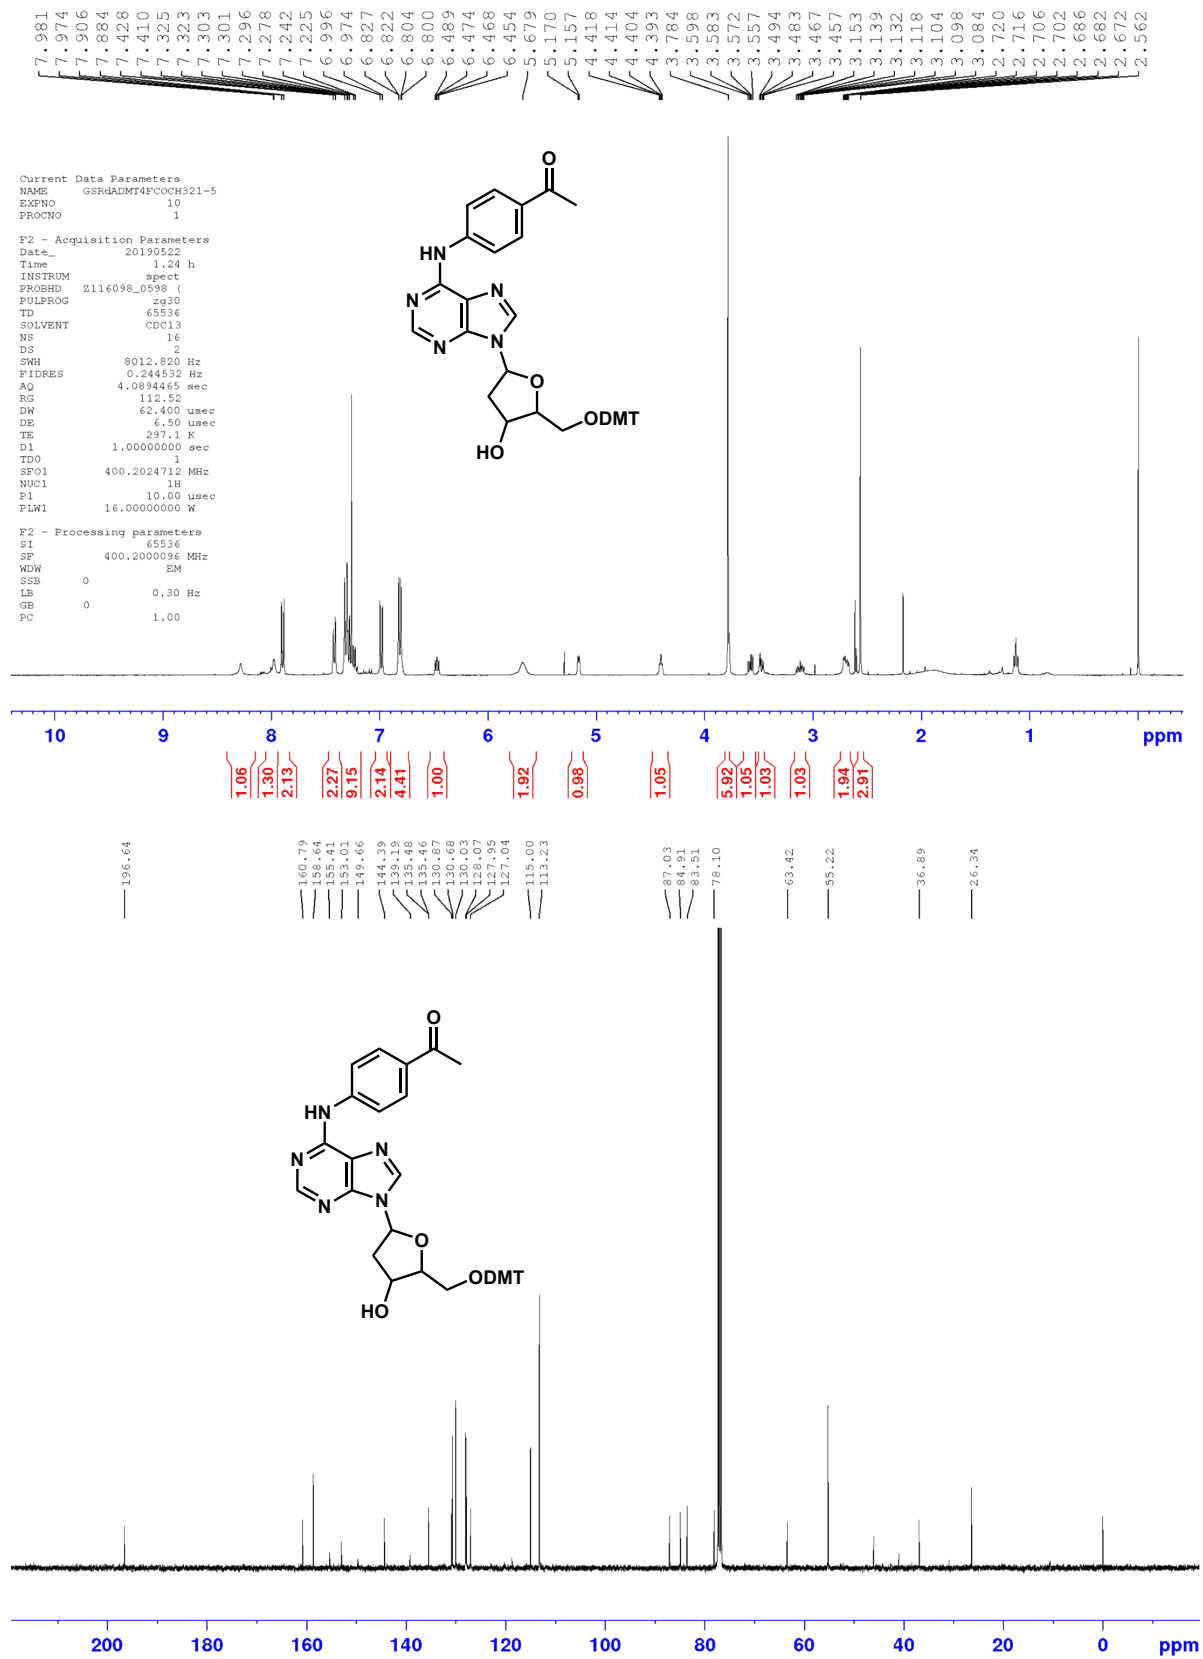

Figure S53: <sup>1</sup>H and <sup>13</sup>C NMR spectra of **2d** in CDCl<sub>3</sub>.

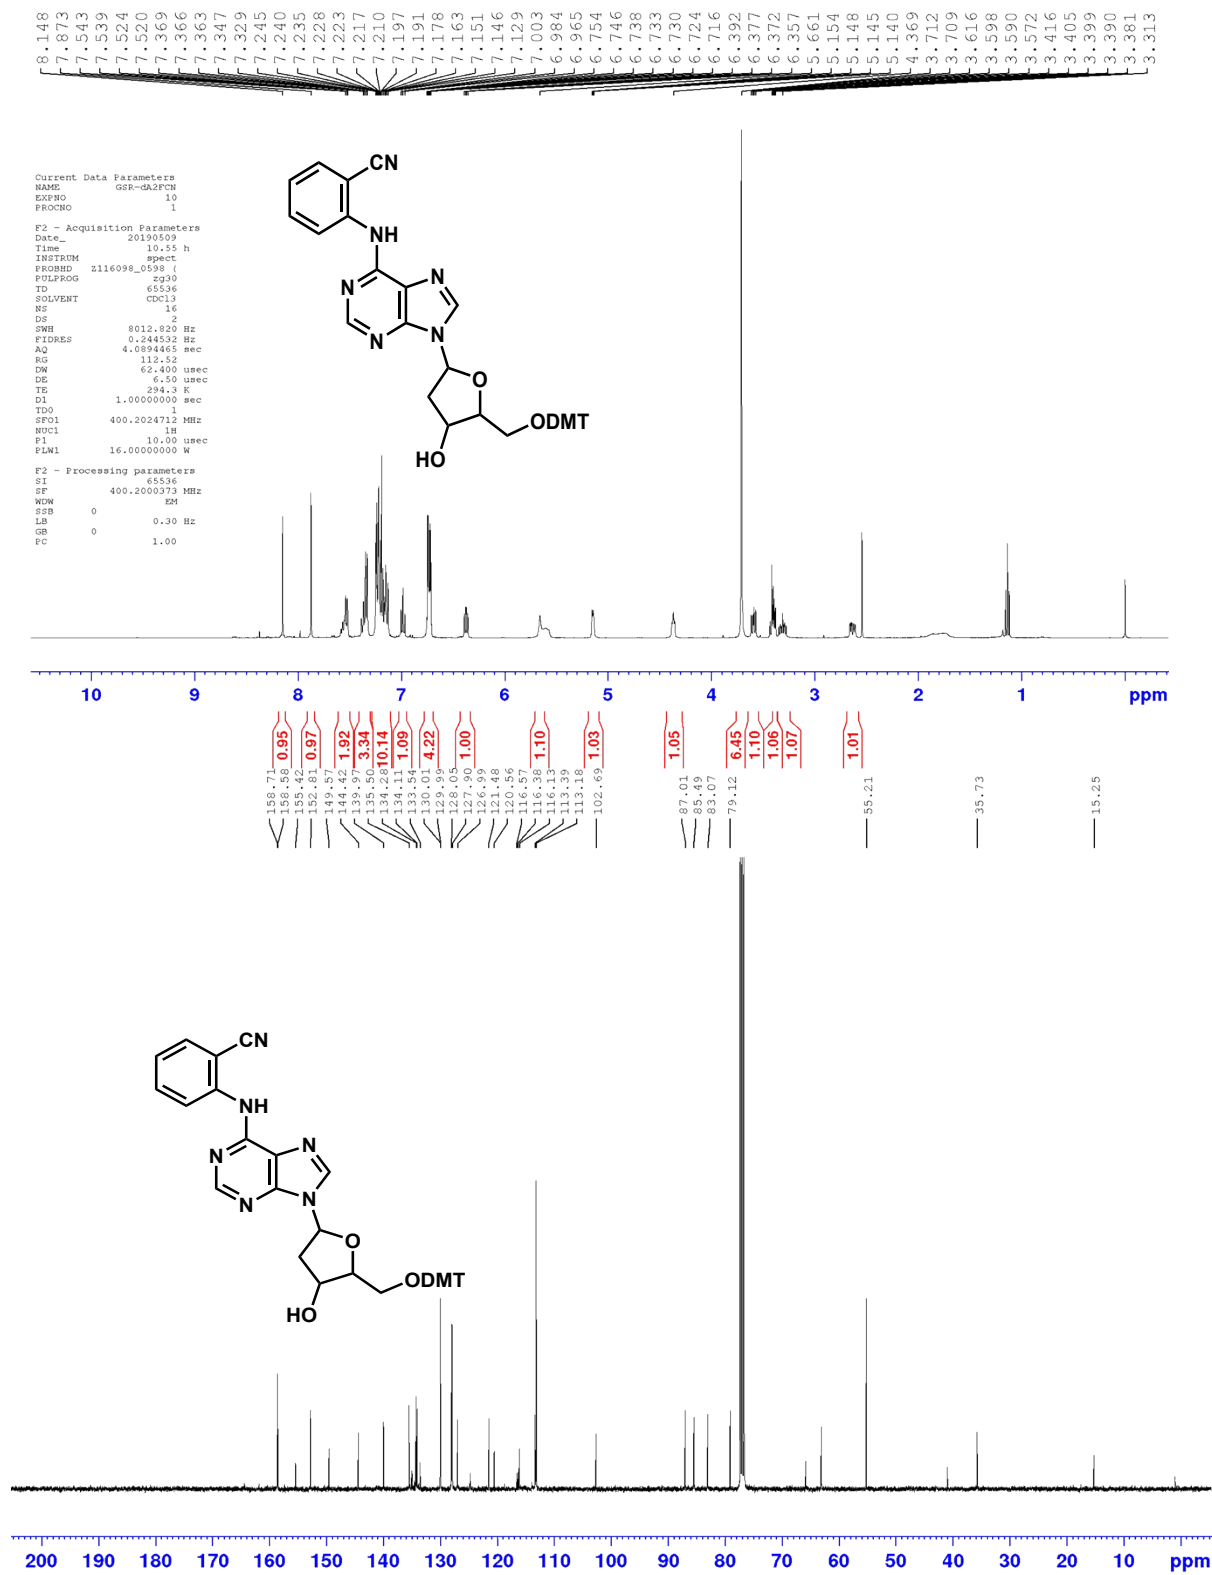

Figure S54:  $^1\text{H}$  and  $^{13}\text{C}$  NMR spectra of **2e** in  $\text{CDCl}_3$ .

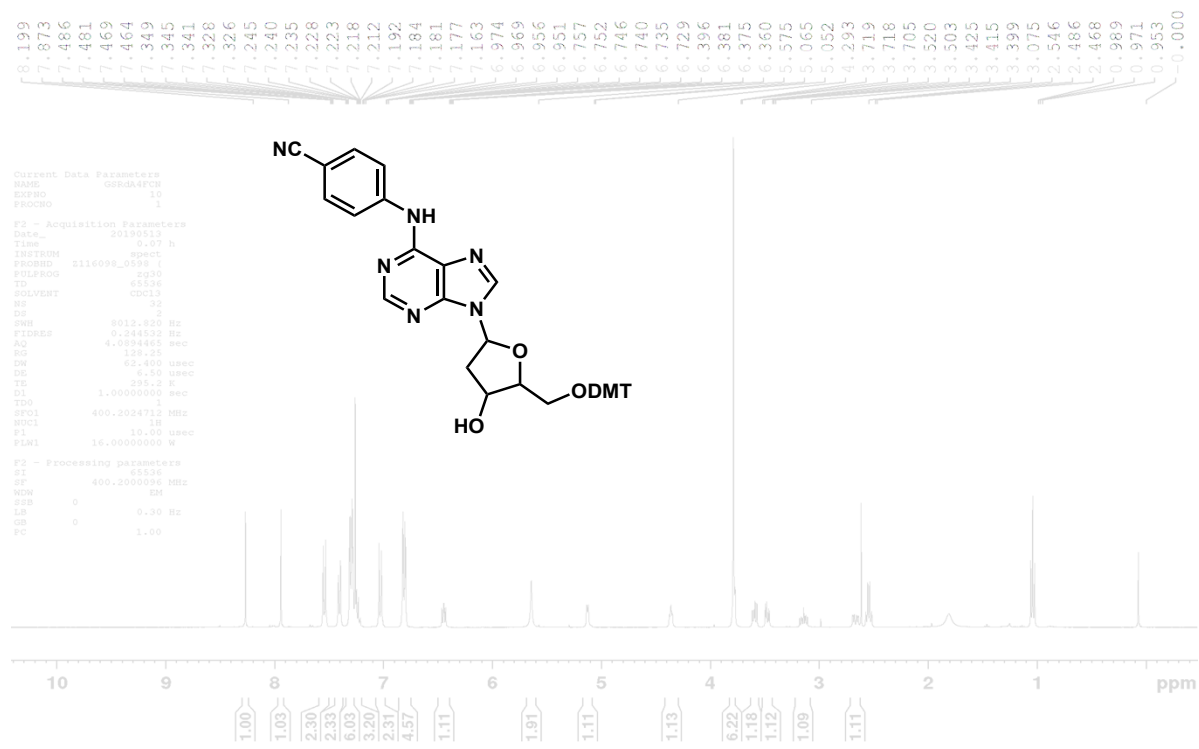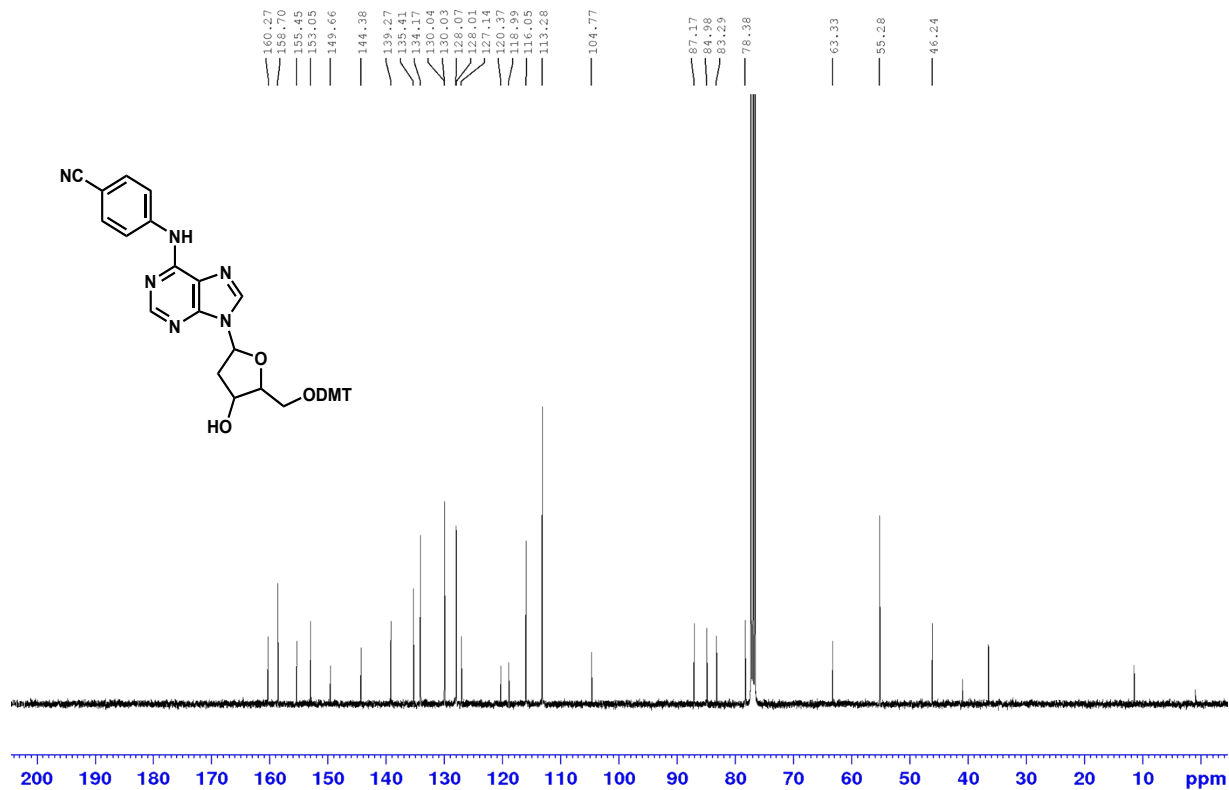

Figure S55:  $^1\text{H}$  and  $^{13}\text{C}$  NMR spectra of **2f** in  $\text{CDCl}_3$ .

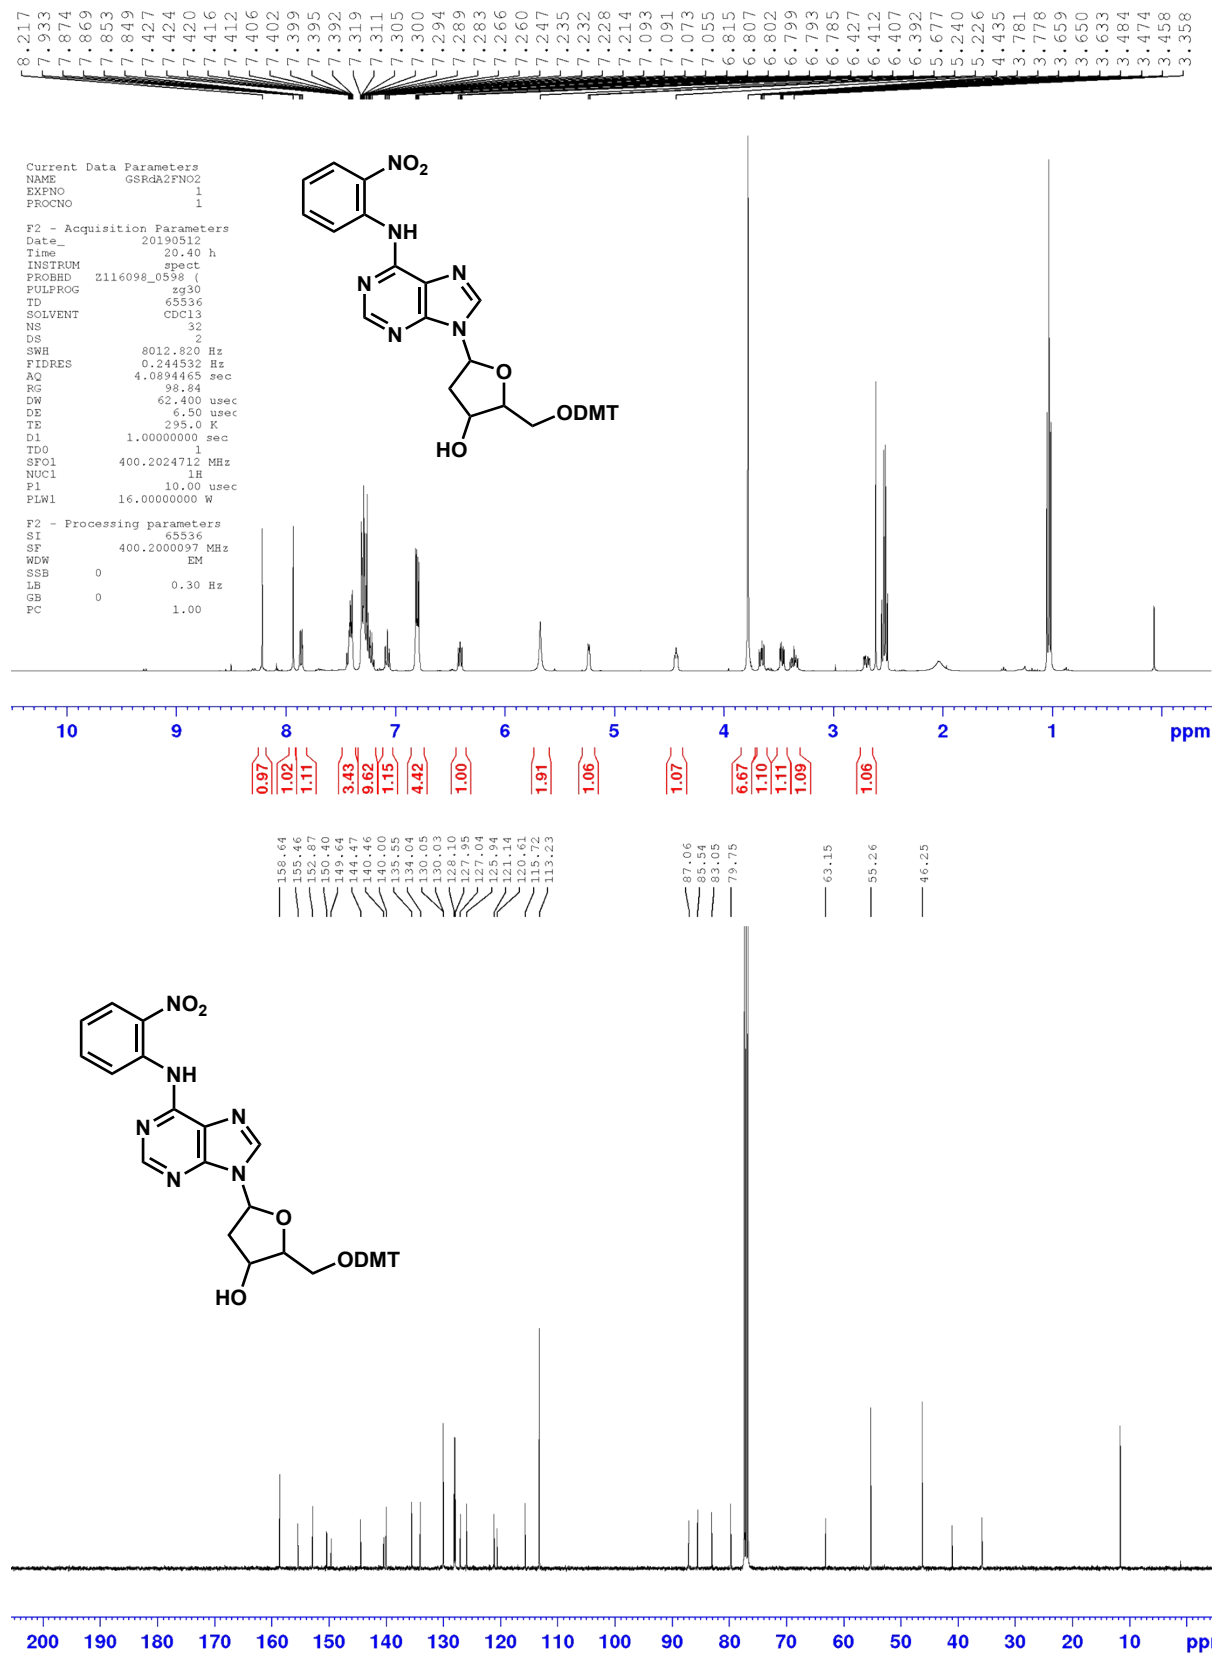

Figure S56: <sup>1</sup>H and <sup>13</sup>C NMR spectra of **2g** in CDCl<sub>3</sub>.

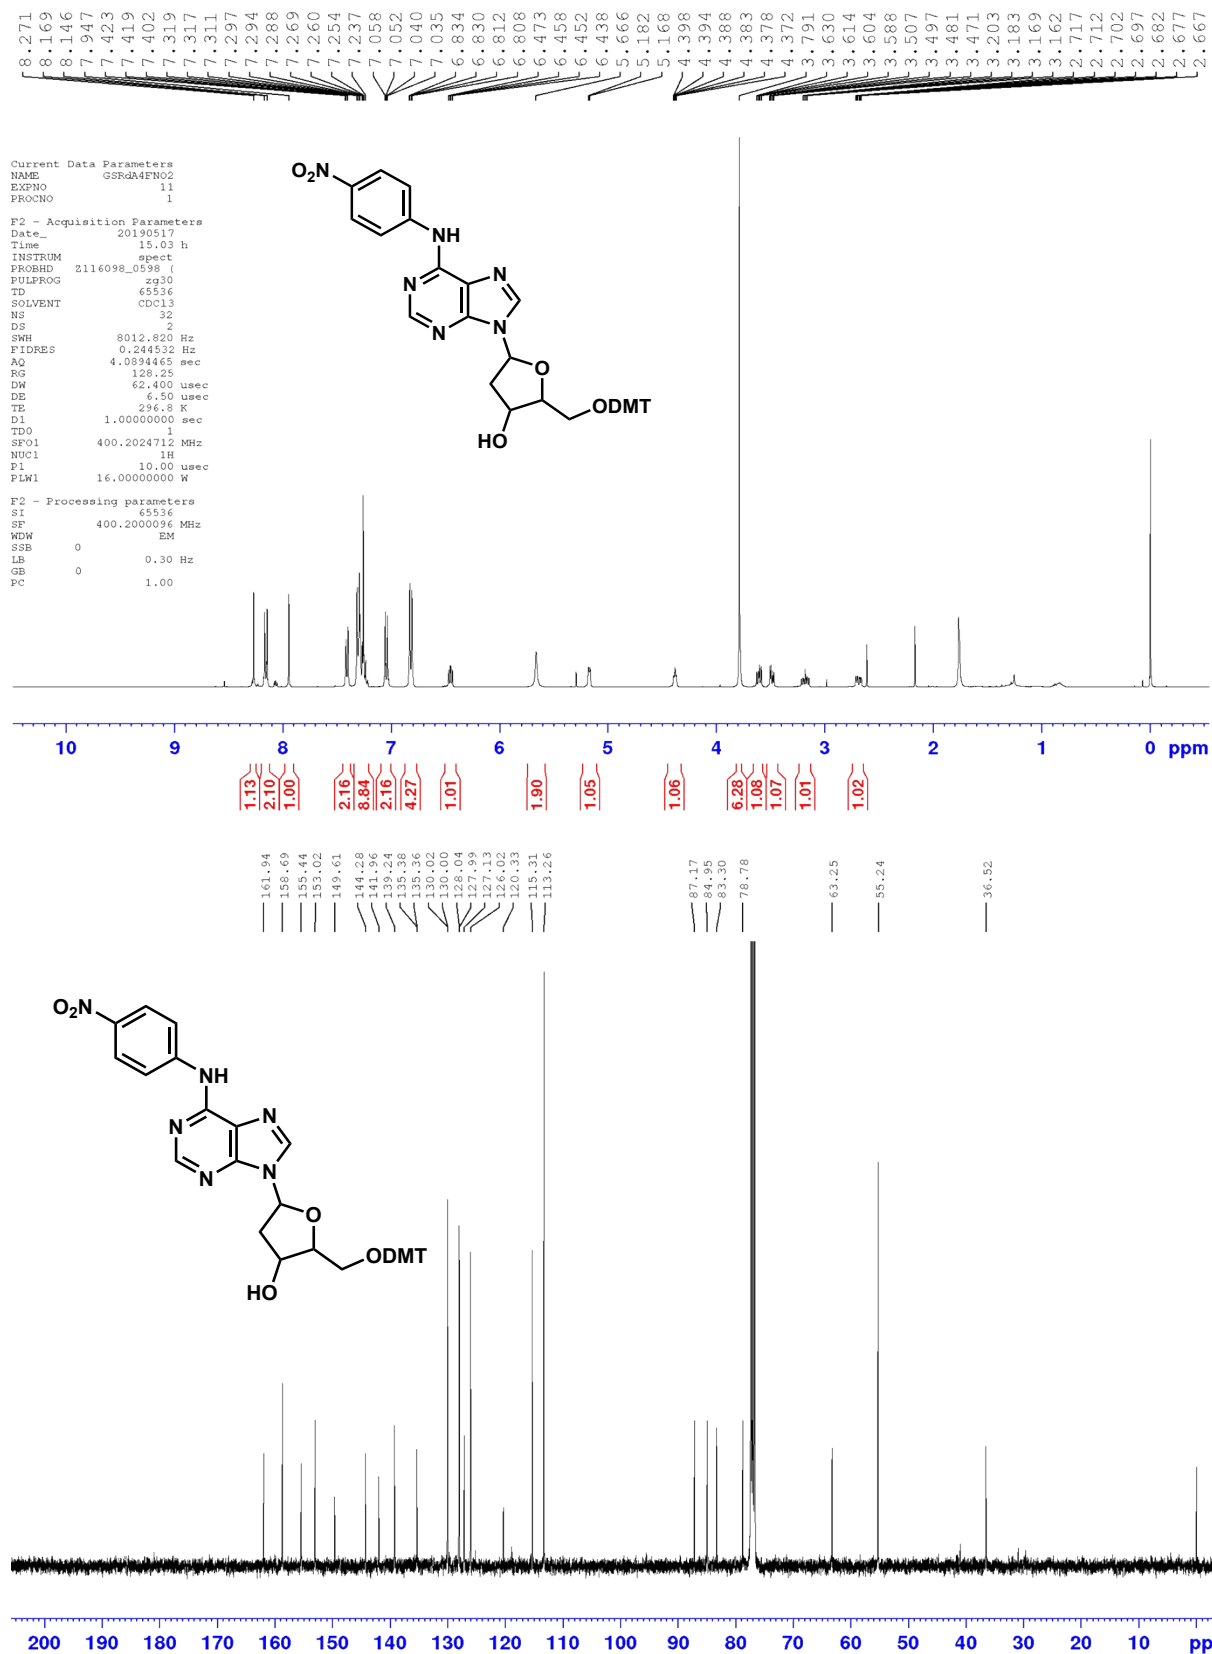

Figure S57:  $^1\text{H}$  and  $^{13}\text{C}$  NMR spectra of **2h** in  $\text{CDCl}_3$ .

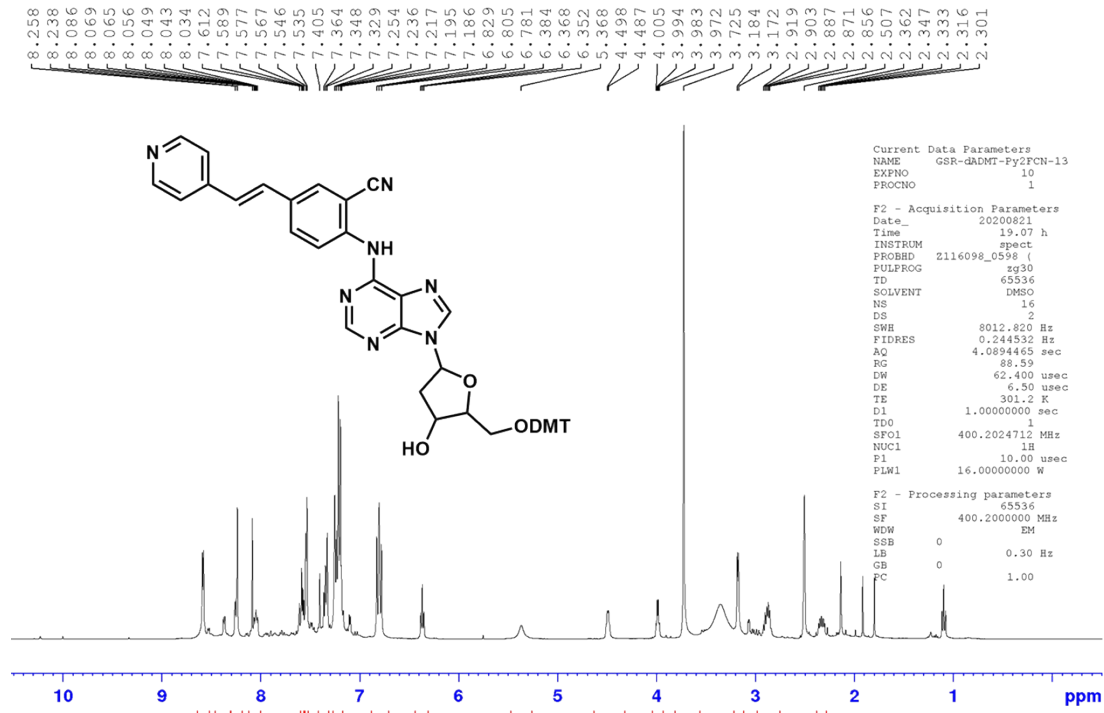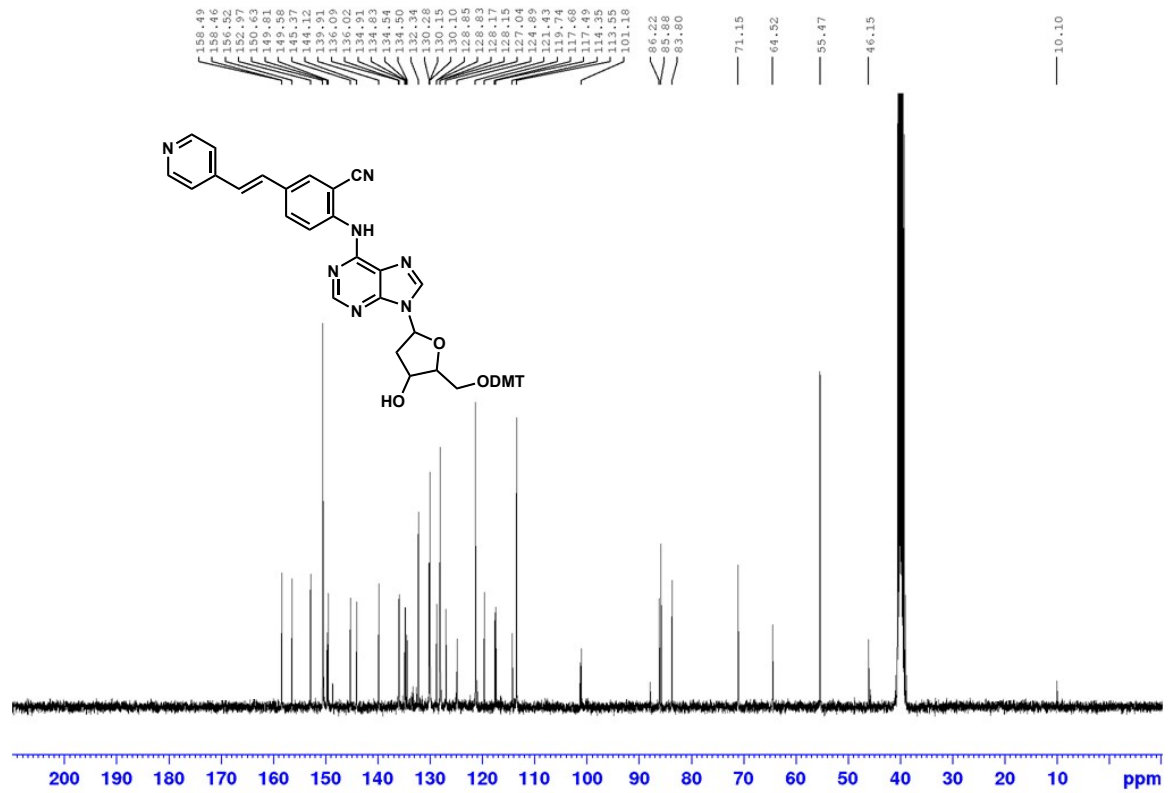

Figure S58:  $^1\text{H}$  and  $^{13}\text{C}$  NMR spectra of **2i** in  $\text{DMSO-}d_6$ .

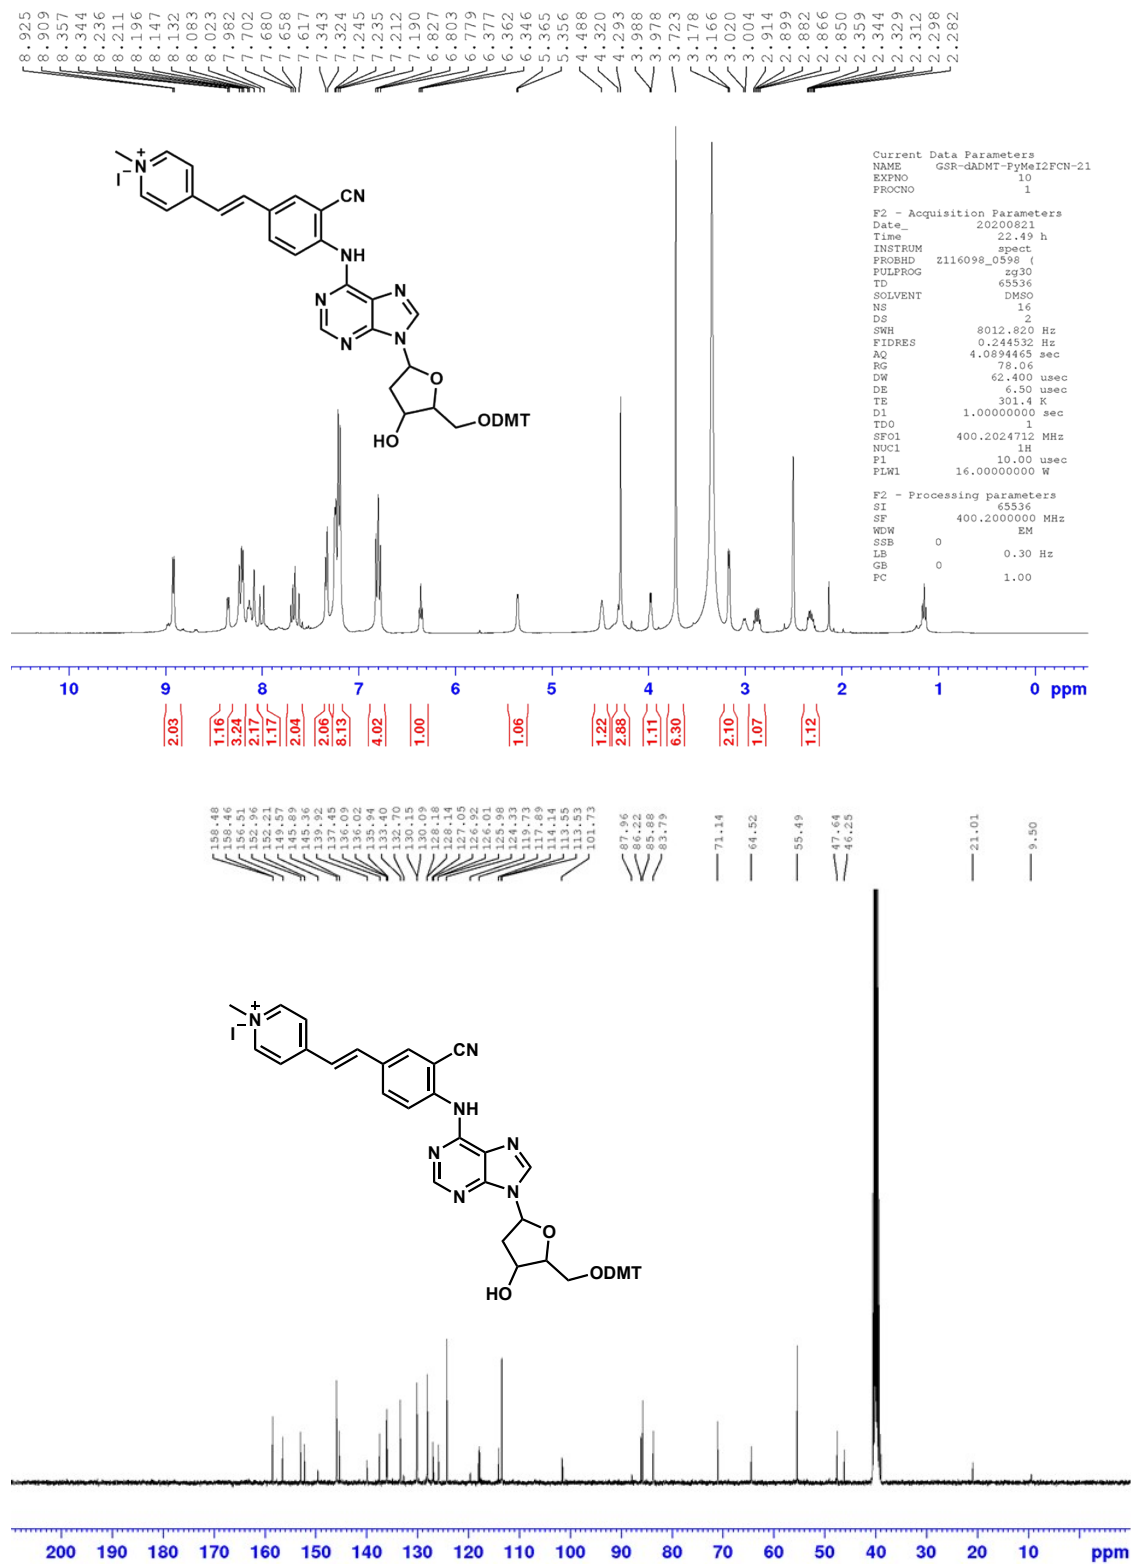



Figure S59:  $^1\text{H}$  and  $^{13}\text{C}$  NMR spectra of **2j** in  $\text{DMSO}-d_6$ .

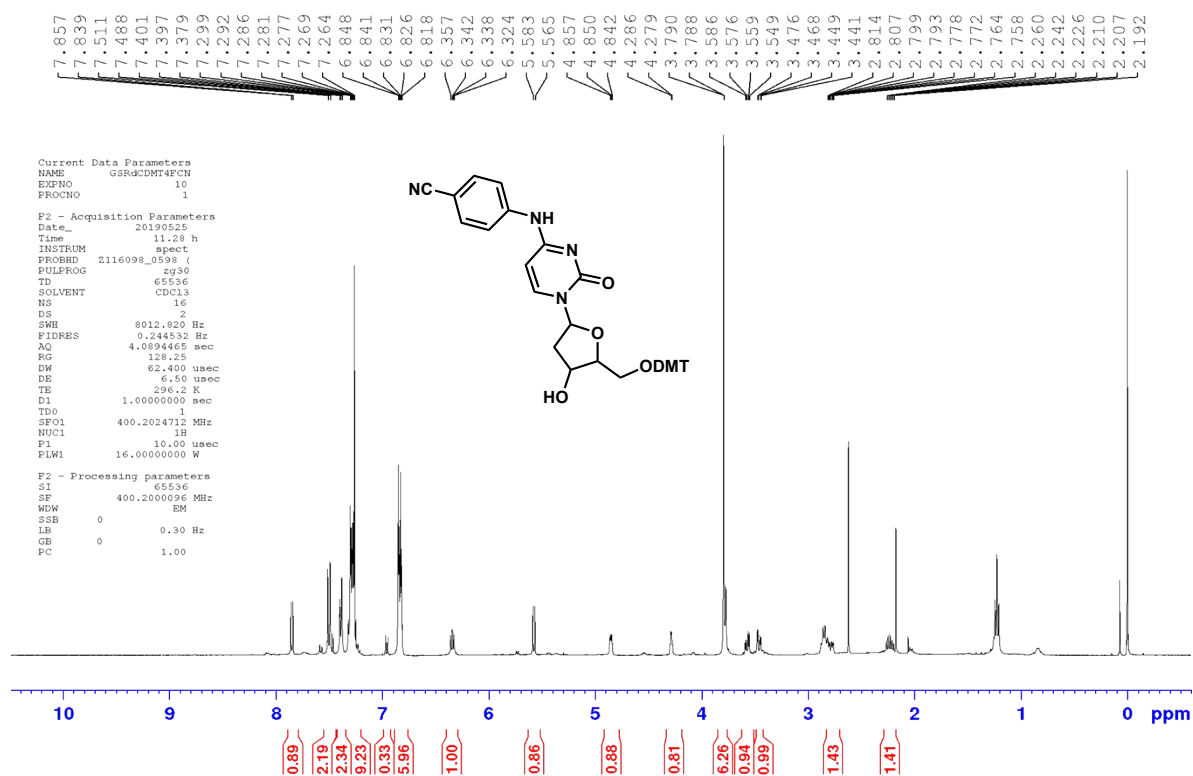

Figure S60:  $^1\text{H}$  and  $^{13}\text{C}$  NMR spectra of **3f** in  $\text{CDCl}_3$ .

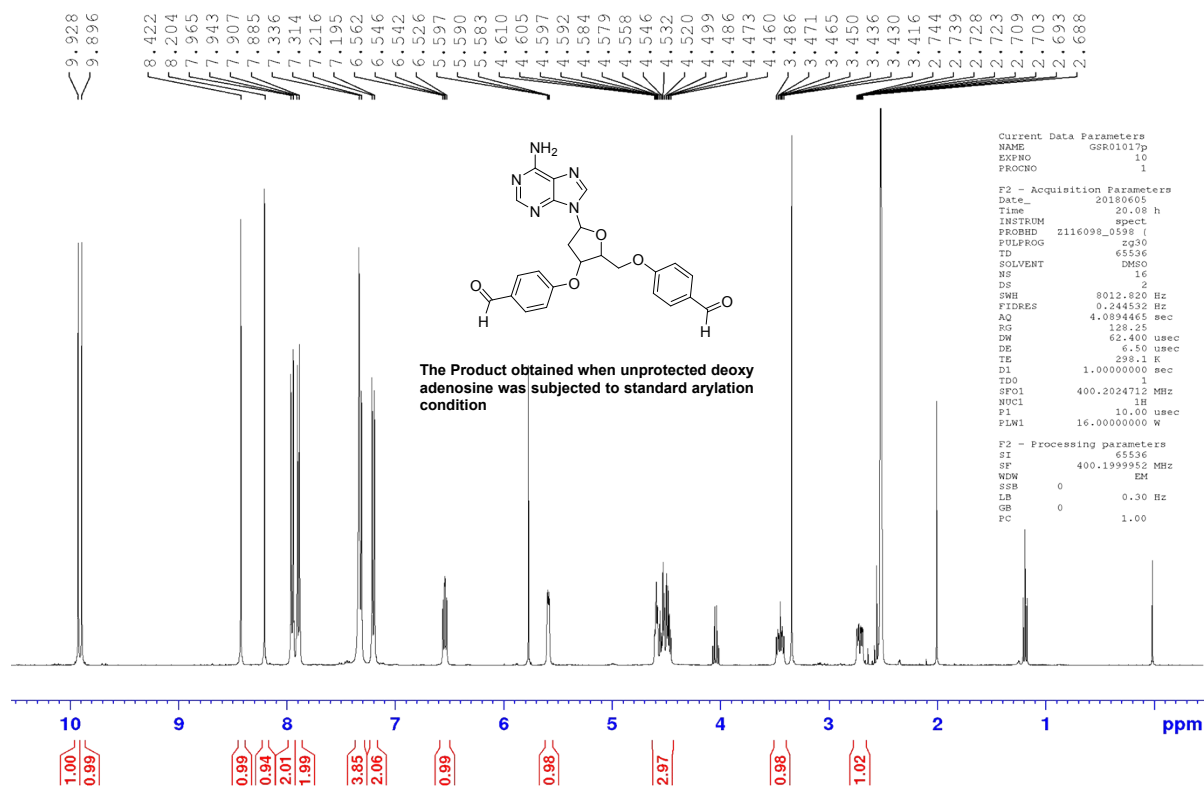

Figure S61:  $^1\text{H}$  and  $^{13}\text{C}$  NMR spectra of **2a1** in  $\text{CDCl}_3$ .

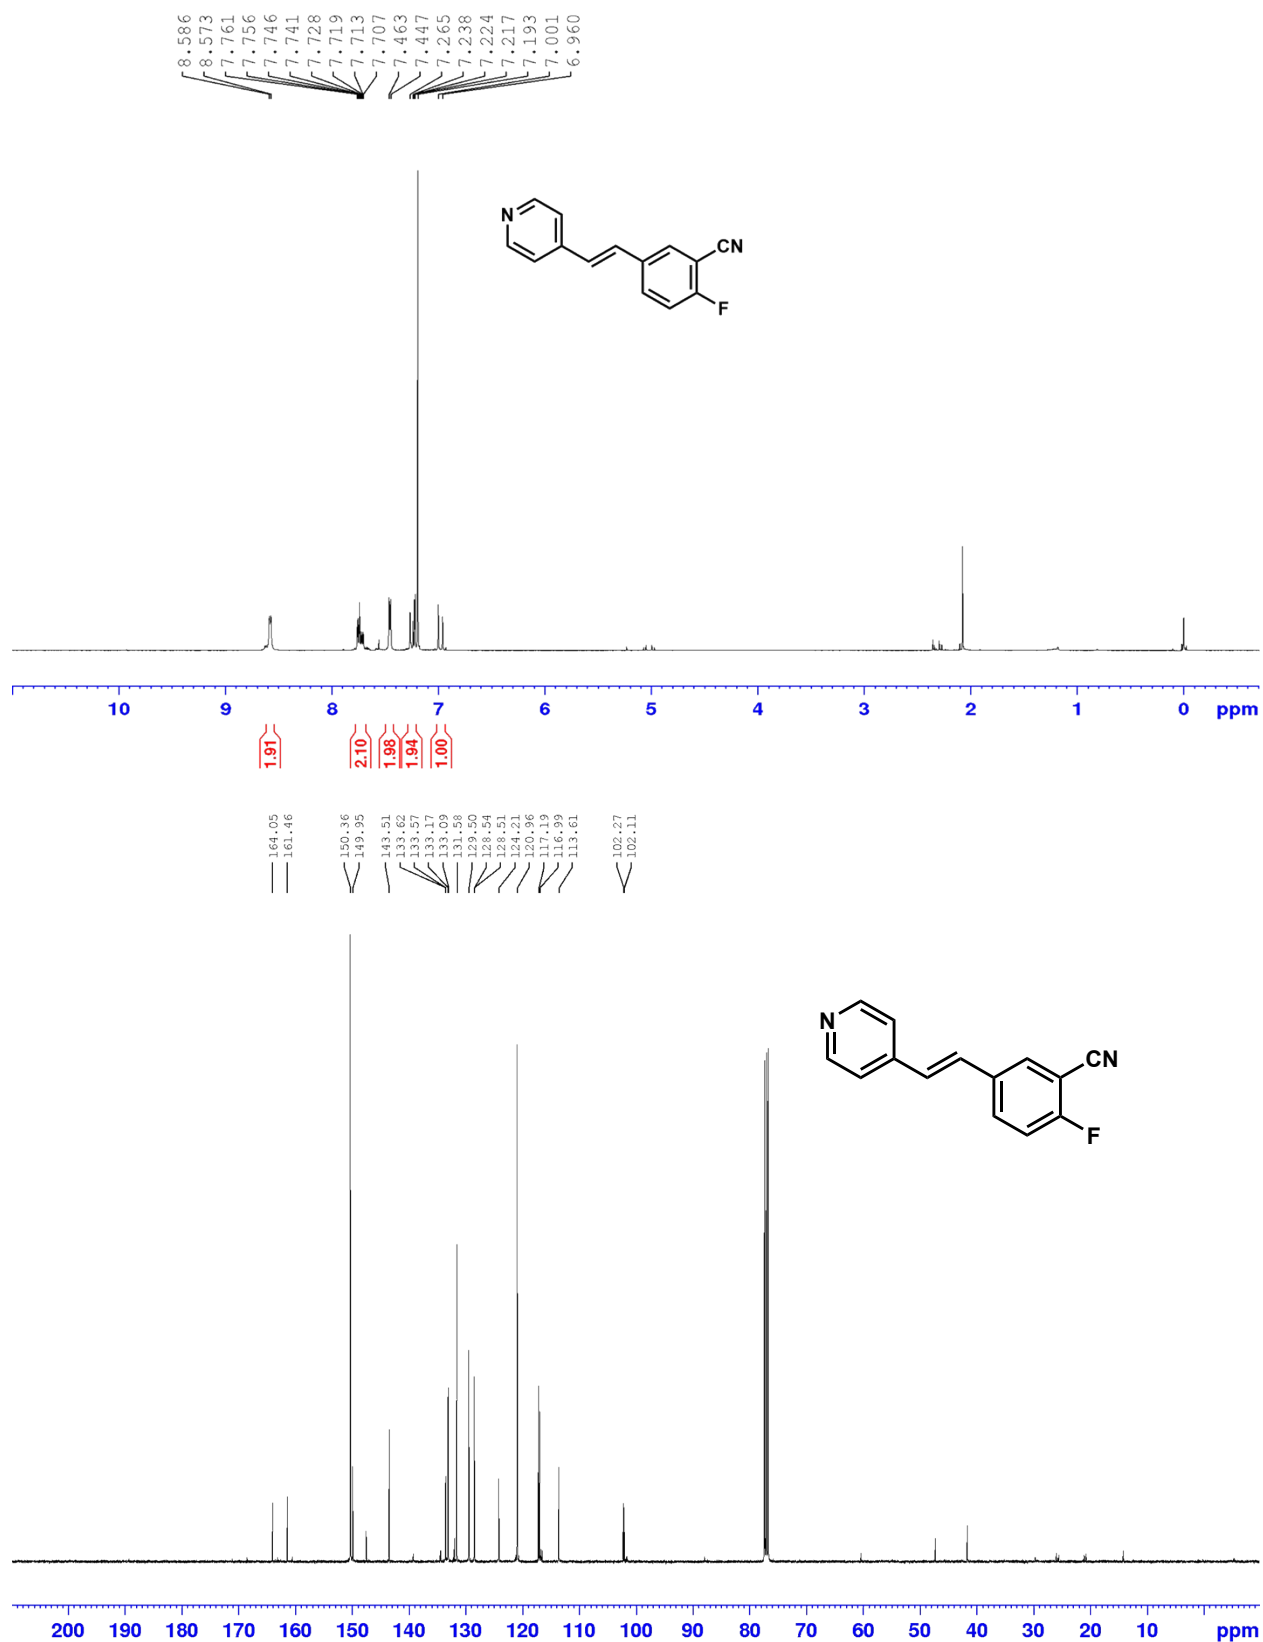

Figure S62:  $^1\text{H}$  and  $^{13}\text{C}$  NMR spectra of Y in  $\text{DMSO-}d_6$ .

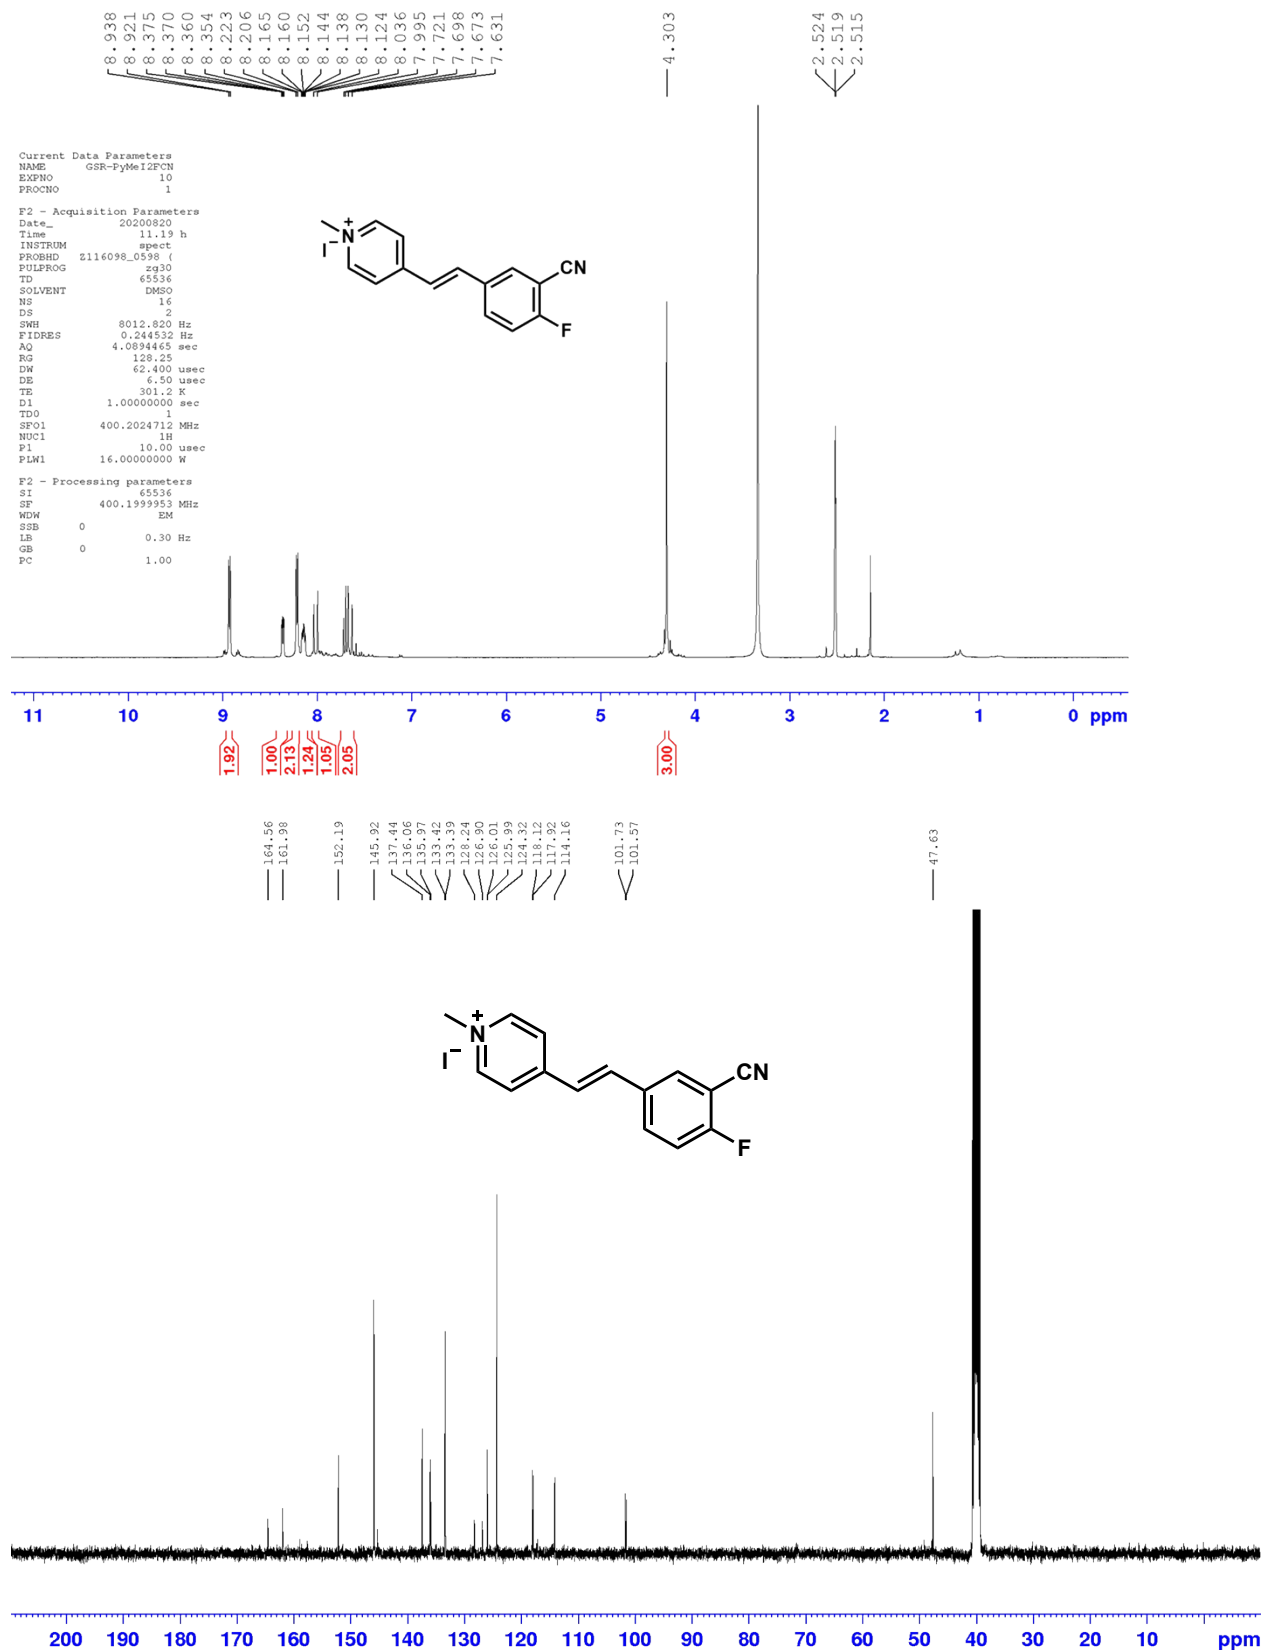

Figure S63:  $^1\text{H}$  and  $^{13}\text{C}$  NMR spectra of **Z** in  $\text{DMSO}-d_6$ .

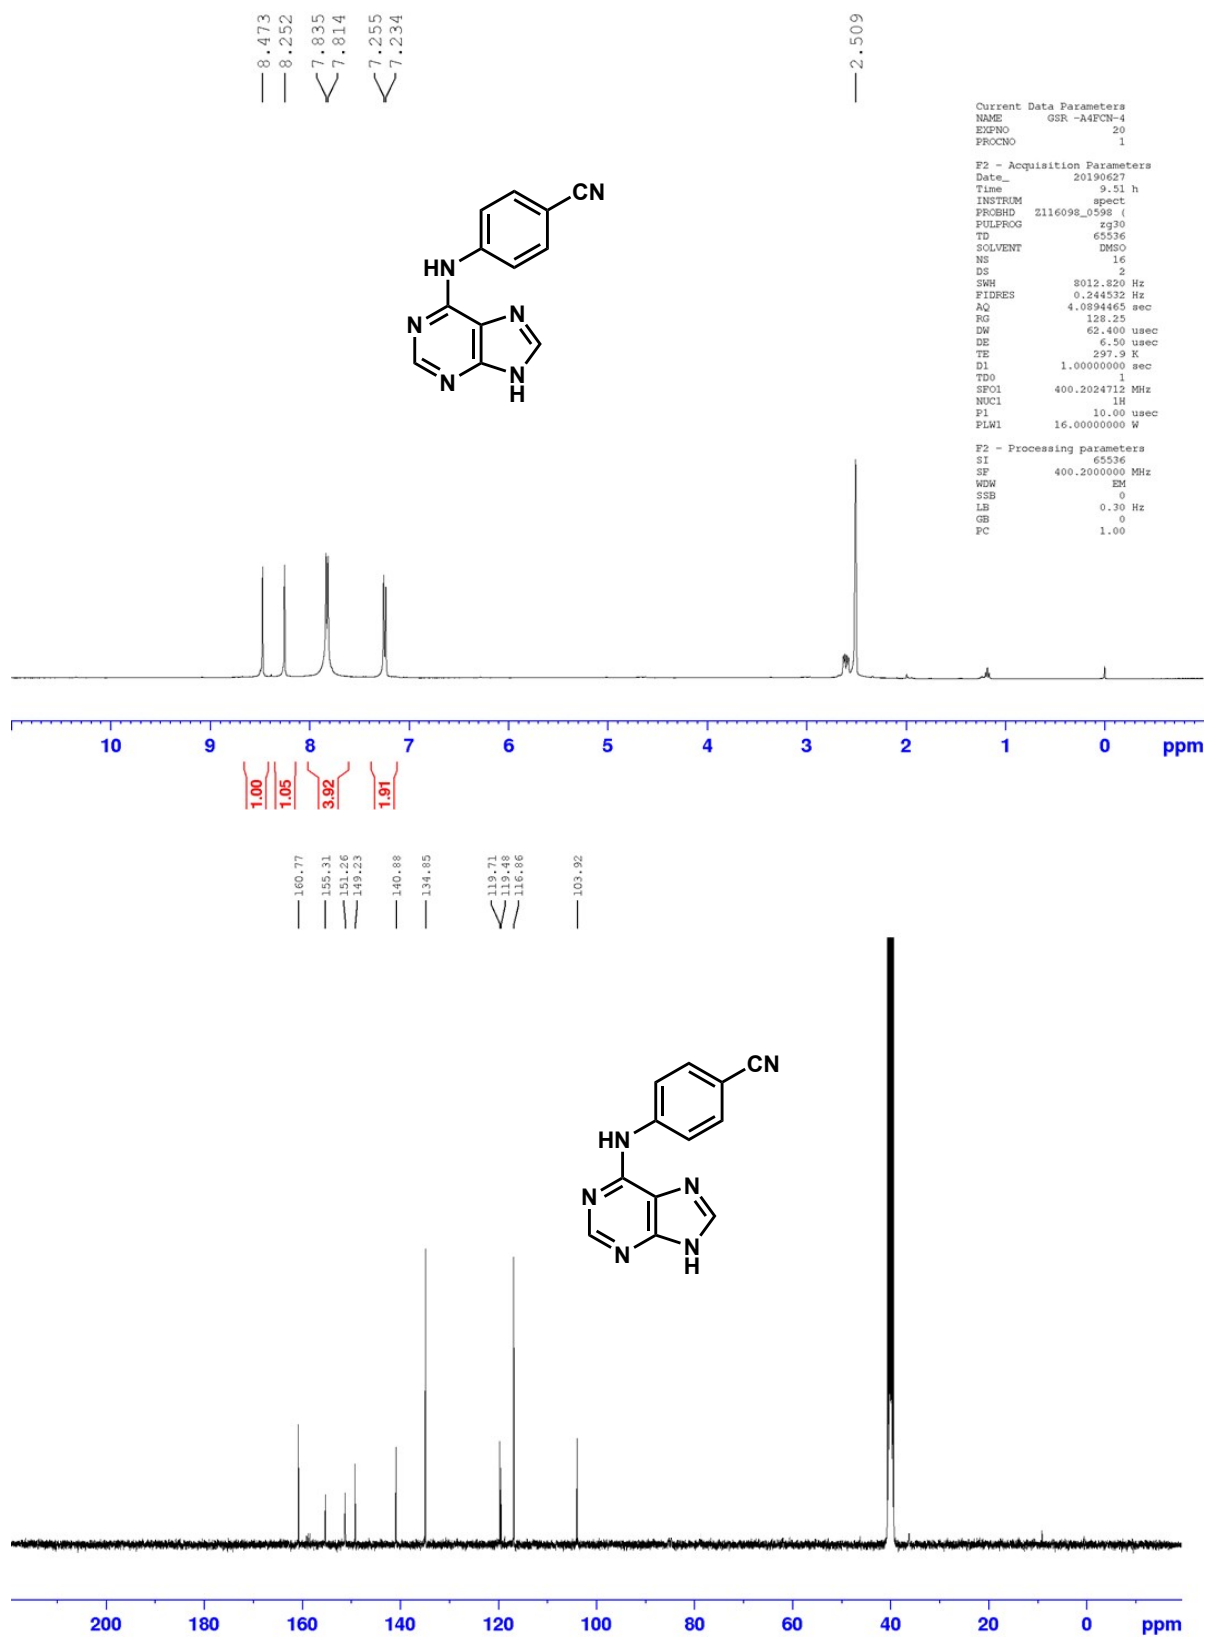

**Figure S64:**  $^1\text{H}$  and  $^{13}\text{C}$  NMR spectra of N-(4-Cyano Phenyl) Adenine in  $\text{DMSO-}d_6$ .
